# Supplementary material for: Straightforward chemoselective access to unsymmetrical dithioacetals through a thiosulfonate homologation-nucleophilic substitution sequence
Source: Royal Society of Chemistry journal article supplement (doi:10.1039/d0cc04896h), 2020-01-01

*Electronic Supporting Information*

*for*

**Straightforward Chemoselective Access to Unsymmetrical  
Dithioacetals through a Thiosulfonates Homologation-  
Nucleophilic Substitution Sequence**

Laura Ielo,<sup>a</sup> Veronica Pillari,<sup>a</sup> Natalie Gajic,<sup>b</sup> Wolfgang Holzer<sup>a</sup> and Vittorio Pace<sup>a,c\*</sup>

---

<sup>a</sup> *University of Vienna - Department of Pharmaceutical Chemistry. Althanstrasse, 14, 1090, Vienna, Austria. E-mail: [vittorio.pace@univie.ac.at](mailto:vittorio.pace@univie.ac.at); [vittorio.pace@unito.it](mailto:vittorio.pace@unito.it) Web: <http://drugsynthesis.univie.ac.at/>.*

<sup>b</sup> *University of Vienna – X-Ray Structure Analysis Center - Waehringerstrasse 42, 1090, Vienna, Austria.*

<sup>c</sup> *University of Turin – Department of Chemistry. Via P. Giuria 7, 10125, Turin, Italy.*

## Table of Contents

|                                                                                    |    |
|------------------------------------------------------------------------------------|----|
| 1. General Methods                                                                 | 3  |
| 2. General Procedure                                                               | 4  |
| 3. Spectral and Characterization Data                                              | 5  |
| 4. Applications                                                                    | 21 |
| 5. X-Ray Analysis of Compound 10, 15 and 28                                        | 23 |
| 6. References                                                                      | 28 |
| 7. Copies of $^1\text{H}$ - and $^{13}\text{C}$ -NMR Spectra for all the compounds | 29 |

## 1. General Methods

Melting points were determined on a Reichert–Kofler hot-stage microscope and are uncorrected. Mass spectra were obtained on a Shimadzu QP 1000 instrument (EI, 70 eV) and on a Bruker maXis 4G instrument (ESI-TOF, HRMS).  $^1\text{H}$ ,  $^{13}\text{C}$ ,  $^{19}\text{F}$  and  $^{15}\text{N}$  NMR spectra were recorded with a Bruker Avance III 400 spectrometer (400 MHz for  $^1\text{H}$ , 100 MHz for  $^{13}\text{C}$ , 376 MHz for  $^{19}\text{F}$  and 40 MHz for  $^{15}\text{N}$ ) at 298 K using a directly detecting broadband observe (BBFO) probe. The center of the (residual) solvent signal was used as an internal standard which was related to TMS with  $\delta$  7.26 ppm ( $^1\text{H}$  in  $\text{CDCl}_3$ ) and  $\delta$  77.0 ppm ( $^{13}\text{C}$  in  $\text{CDCl}_3$ ).  $^{19}\text{F}$  NMR spectra were referenced via the  $\Xi$  ratio (absolute referencing).  $^{15}\text{N}$  NMR spectra (gs-HMBC, gs-HSQC) were referenced against neat, external nitromethane. Spin-spin coupling constants ( $J$ ) are given in Hz. In nearly all cases, full and unambiguous assignment of all resonances was performed by combined application of standard NMR techniques, such as APT, HSQC, HMBC, HSQCTOCSY, COSY and NOESY experiments. The starting thiosulfonates were commercially available ( $\text{PhSSO}_2\text{Ph}$ ,  $\text{MeSSO}_2\text{Me}$ ) or prepared according to literature (for compound **33** and **34**).<sup>[1]</sup> Chemicals were purchased from Fluorochem, Acros, Alfa Aesar or Sigma-Aldrich and used as received. MeLi-LiBr (1.5 M ethereal solution) was titrated immediately prior to use according to literature.<sup>[2]</sup>

## 2. General procedure for the homologation of *S*-thiosulfonate ester to asymmetric dithioacetals (General Procedure 1, GP1)

The *S*-thiosulfonate ester (RSSO<sub>2</sub>R, 1.0 equiv) was dissolved in dry THF under Argon and cooled down to -78 °C. Chloriodomethane (2.0 equiv) was added and, after 5 min, MeLi-LiBr (2.2 M solution in Et<sub>2</sub>O, 1.8 equiv) was added *via* syringe pump (rate 0.2 mL/min) and then, the resulting mixture was stirred for 1 h. After increasing the temperature up to 0 °C, a solution of mercaptane (R<sup>1</sup>SH, 1.3 equiv) and NaI (0.1 equiv) in dry DMF was added dropwise. Upon reaching room temperature, the reaction mixture was further stirred for 6 h and, subsequently was quenched with aqueous saturated NH<sub>4</sub>Cl solution. The resulting organic phase was extracted 3 times with Et<sub>2</sub>O, washed with brine, dried over anhydrous Na<sub>2</sub>SO<sub>4</sub> and concentrated *in vacuo*. The crude compounds were purified as reported below through column chromatography.

### 3. Spectral and Characterization Data

#### 1-[(Benzylsulfanyl)methyl]-4-bromobenzene (2)

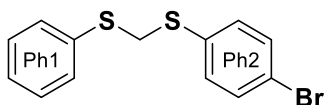

By following general procedure 1, starting from *S*-phenyl benzenesulfonothioate (250 mg, 0.20 mL, 1.0 mmol, 1.0 equiv), ClCH<sub>2</sub>I (353 mg, 0.15 mL, 2.0 mmol, 2.0 equiv), MeLi-LiBr complex (0.8 mL of 2.2 M in Et<sub>2</sub>O, 1.8 mmol, 1.8 equiv) in THF (5 mL), followed by the addition of 4-bromobenzene-1-thiol (246 mg, 1.3 mmol, 1.3 equiv) and NaI (15 mg, 0.1 mmol, 0.1 equiv) in dry DMF (3 mL), compound **2** was obtained in 93% yield (289 mg) as colourless oil after chromatography on silica gel (90:10 v/v, *n*-hexane/dichloromethane).

<sup>1</sup>H NMR (400 MHz, CDCl<sub>3</sub>) δ: 7.43 (m, 2H, Ph2 H-2,6), 7.41 (m, 2H, Ph1 H-2,6), 7.32 (m, 2H, Ph1 H-3,5), 7.27 (m, 3H, Ph1 H-4, Ph2 H-3,5), 4.31 (s, 2H, SCH<sub>2</sub>).

<sup>13</sup>C NMR (100 MHz, CDCl<sub>3</sub>) δ: 134.6 (Ph1 C-1), 134.0 (Ph2 C-4), 132.3 (Ph2 C-3,5), 132.1 (Ph2 C-2,6), 130.9 (Ph1 C-2,6), 129.1 (Ph1 C-3,5), 127.3 (Ph1 C-4), 121.3 (Ph2 C-1), 40.7 (SCH<sub>2</sub>).

HRMS (ESI), *m/z*: calcd. for C<sub>13</sub>H<sub>12</sub>BrS<sub>2</sub><sup>+</sup>: 292.9994 [M+H]<sup>+</sup>; found: 292.9992.

#### 1-Chloro-4-[[phenylsulfanyl)methyl]sulfanyl]benzene (3)<sup>[3]</sup>

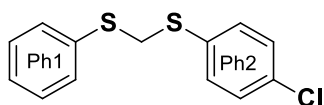

By following general procedure 1, starting from *S*-phenyl benzenesulfonothioate (250 mg, 0.20 mL, 1.0 mmol, 1.0 equiv), ClCH<sub>2</sub>I (353 mg, 0.15 mL, 2.0 mmol, 2.0 equiv), MeLi-LiBr complex (0.8 mL of 2.2 M in Et<sub>2</sub>O, 1.8 mmol, 1.8 equiv) in THF (5 mL), followed by the addition of 4-chlorobenzene-1-thiol (188 mg, 1.3 mmol, 1.3 equiv) and NaI (15 mg, 0.1 mmol, 0.1 equiv) in dry DMF (3 mL), compound **3** was obtained in 93% yield (248 mg) as colourless oil after chromatography on silica gel (90:10 v/v, *n*-hexane/dichloromethane).

<sup>1</sup>H NMR (400 MHz, CDCl<sub>3</sub>) δ: 7.42 (m, 2H, Ph1 H-2,6), 7.35 (m, 2H, Ph2 H-3,5), 7.32 (m, 2H, Ph1 H-3,5), 7.28 (m, 2H, Ph2 H-2,6), 7.27 (m, 1H, Ph1 H-4), 4.31 (s, 2H, SCH<sub>2</sub>).

<sup>13</sup>C NMR (100 MHz, CDCl<sub>3</sub>) δ: 134.6 (Ph1 C-1), 133.4 (Ph2 C-1), 133.3 (Ph2 C-4), 132.2 (Ph2 C-3,5), 130.9 (Ph1 C-2,6), 129.1 (Ph2 C-2,6), 129.0 (Ph1 C-3,5), 127.3 (Ph1 C-4), 40.9 (SCH<sub>2</sub>).

HRMS (ESI), *m/z*: calcd. for C<sub>13</sub>H<sub>12</sub>ClS<sub>2</sub><sup>+</sup>: 267.0063 [M+H]<sup>+</sup>; found: 267.0065.

#### 1,3-Dichloro-2-[[phenylsulfanyl)methyl]sulfanyl]benzene (4)

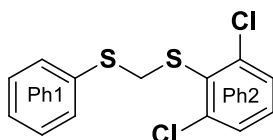

By following general procedure 1, starting from *S*-phenyl benzenesulfonylthioate (250 mg, 0.20 mL, 1.0 mmol, 1.0 equiv), ClCH<sub>2</sub>I (353 mg, 0.15 mL, 2.0 mmol, 2.0 equiv), MeLi-LiBr complex (0.8 mL of 2.2 M in Et<sub>2</sub>O, 1.8 mmol, 1.8 equiv) in THF (5 mL), followed by the addition of 2,6-dichlorobenzene-1-thiol (233 mg, 1.3 mmol, 1.3 equiv) and NaI (15 mg, 0.1 mmol, 0.1 equiv) in dry DMF (3 mL), compound **4** was obtained in 89% yield (268 mg) as orange solid (m.p.: 55-57 °C) after recrystallization with diethyl ether.

<sup>1</sup>H NMR (400 MHz, CDCl<sub>3</sub>) δ: 7.46 (m, 2H, Ph1 H-2,6), 7.36 (m, 2H, Ph2 H-4,6), 7.29 (m, 2H, Ph1 H-3,5), 7.22 (m, 1H, Ph1 H-4), 7.18 (m, 1H, Ph2 H-5), 4.40 (s, 2H, SCH<sub>2</sub>).

<sup>13</sup>C NMR (100 MHz, CDCl<sub>3</sub>) δ: 141.5 (Ph2 C-1,3), 134.8 (Ph1 C-1), 131.7 (Ph2 C-2), 130.4 (Ph2 C-5), 130.2 (Ph1 C-2,6), 128.9 (Ph1 C-3,5), 128.6 (Ph2 C-4,6), 127.0 (Ph1 C-4), 40.3 (SCH<sub>2</sub>).

HRMS (ESI), *m/z*: calcd. for C<sub>13</sub>H<sub>11</sub>Cl<sub>2</sub>S<sub>2</sub><sup>+</sup>: 300.9674 [M+H]<sup>+</sup>; found: 300.9673.

### 1-Fluoro-4-(((phenylsulfanyl)methyl)sulfanyl)benzene (5)

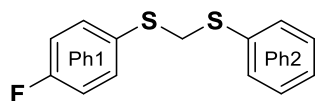

By following general procedure 1, starting from *S*-phenyl benzenesulfonylthioate (250 mg, 0.20 mL, 1.0 mmol, 1.0 equiv), ClCH<sub>2</sub>I (353 mg, 0.15 mL, 2.0 mmol, 2.0 equiv), MeLi-LiBr complex (0.8 mL of 2.2 M in Et<sub>2</sub>O, 1.8 mmol, 1.8 equiv) in THF (5 mL), followed by the addition of 4-fluorobenzene-1-thiol (167 mg, 0.14 mL, 1.3 mmol, 1.3 equiv) and NaI (15 mg, 0.1 mmol, 0.1 equiv) in dry DMF (3 mL), compound **5** was obtained in 91% yield (228 mg) as yellow oil after filtration on silica gel.

<sup>1</sup>H NMR (400 MHz, CDCl<sub>3</sub>) δ: 7.44 (m, 2H, Ph1 H-3,5), 7.41 (m, 2H, Ph2 H-2,6), 7.32 (m, 2H, Ph2 H-3,5), 7.26 (m, 1H, Ph2 H-4), 7.01 (m, 2H, Ph1 H-2,6), 4.29 (s, 2H, SCH<sub>2</sub>S).

<sup>13</sup>C NMR (100 MHz, CDCl<sub>3</sub>) δ: 162.5 (d, *J* = 247.9 Hz, Ph1 C-1), 134.8 (Ph2 C-1), 134.2 (d, *J* = 8.2 Hz, Ph1 C-5), 134.1 (d, *J* = 8.2 Hz, Ph1 C-3), 130.7 (Ph2 C-2,6), 129.6 (d, *J* = 3.3 Hz, Ph1 C-4), 129.0 (Ph2 C-3,5), 127.1 (Ph2 C-4), 116.1 (d, *J* = 21.9 Hz, Ph1 C-2,6), 41.9 (d, *J* = 1.2 Hz, SCH<sub>2</sub>S).

<sup>19</sup>F NMR (376 MHz, CDCl<sub>3</sub>) δ: -113.7 (m, F).

HRMS (ESI), *m/z*: calcd. for C<sub>13</sub>H<sub>12</sub>FS<sub>2</sub><sup>+</sup>: 251.0359 [M+H]<sup>+</sup>; found: 251.0361.

### 1-(((Phenylsulfanyl)methyl)sulfanyl)-2-(trifluoromethyl)benzene (6)

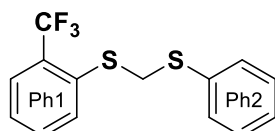

By following general procedure 1, starting from *S*-phenyl benzenesulfonylthioate (250 mg, 0.20 mL, 1.0 mmol, 1.0 equiv), ClCH<sub>2</sub>I (353 mg, 0.15 mL, 2.0 mmol, 2.0 equiv), MeLi-LiBr complex (0.8 mL of 2.2 M in Et<sub>2</sub>O, 1.8 mmol, 1.8 equiv) in THF (5 mL), followed by the addition of 2-

(trifluoromethyl)benzene-1-thiol (232 mg, 0.18 mL, 1.3 mmol, 1.3 equiv) and NaI (15 mg, 0.1 mmol, 0.1 equiv) in dry DMF (3 mL), compound **6** was obtained in 95% yield (285 mg) as yellow oil after filtration on silica gel.

<sup>1</sup>H NMR (400 MHz, CDCl<sub>3</sub>) δ: 7.68 (m, 1H, Ph1 H-3), 7.63 (m, 1H, Ph1 H-6), 7.50 (m, 1H, Ph1 H-5), 7.45 (m, 2H, Ph2 H-2,6), 7.35 (m, 1H, Ph1 H-4), 7.33 (m, 2H, Ph2 H-3,5), 7.27 (m, 1H, Ph2 H-4), 4.37 (s, 2H, SCH<sub>2</sub>S).

<sup>13</sup>C NMR (100 MHz, CDCl<sub>3</sub>) δ: 134.6 (Ph2 C-1), 134.3 (Ph1 C-1), 133.1 (Ph1 C-6), 132.0 (Ph1 C-5), 130.9 (q, *J* = 30.0 Hz, Ph1 C-2), 130.8 (Ph2 C-2,6), 129.1 (Ph2 C-3,5), 127.3 (Ph2 C-4), 127.1 (Ph1 C-4), 126.9 (q, *J* = 5.6 Hz, Ph1 C-3), 123.6 (q, *J* = 273.8 Hz, CF<sub>3</sub>), 40.9 (SCH<sub>2</sub>S).

<sup>19</sup>F NMR (376 MHz, CDCl<sub>3</sub>) δ: -60.5 (s, CF<sub>3</sub>).

HRMS (ESI), *m/z*: calcd. for C<sub>14</sub>H<sub>12</sub>F<sub>3</sub>S<sub>2</sub><sup>+</sup>: 301.0327 [M+H]<sup>+</sup>; found: 301.0330.

#### 1-Nitro-4-[(phenylsulfanyl)methyl]sulfanylbenzene (**7**)

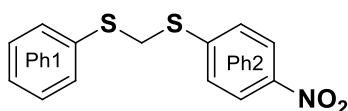

By following general procedure 1, starting from *S*-phenyl benzenesulfonothioate (250 mg, 0.20 mL, 1.0 mmol, 1.0 equiv), ClCH<sub>2</sub>I (353 mg, 0.15 mL, 2.0 mmol, 2.0 equiv), MeLi-LiBr complex (0.8 mL of 2.2 M in Et<sub>2</sub>O, 1.8 mmol, 1.8 equiv) in THF (5 mL), followed by the addition of 4-nitrobenzene-1-thiol (202 mg, 1.3 mmol, 1.3 equiv) and NaI (15 mg, 0.1 mmol, 0.1 equiv) in dry DMF (3 mL), compound **7** was obtained in 85% yield (236 mg) as yellow oil after chromatography on silica gel (70:30 v/v, *n*-hexane/dichloromethane).

<sup>1</sup>H NMR (400 MHz, CDCl<sub>3</sub>) δ: 8.14 (m, 2H, Ph2 H-2,6), 7.45 (m, 2H, Ph1 H-2,6), 7.41 (m, 2H, Ph2 H-3,5), 7.34 (m, 2H, Ph1 H-3,5), 7.30 (m, Ph1 H-4), 4.43 (s, 2H, SCH<sub>2</sub>).

<sup>13</sup>C NMR (100 MHz, CDCl<sub>3</sub>) δ: 145.7 (Ph2 C-1), 145.4 (Ph2 C-4), 133.7 (Ph1 C-1), 131.5 (Ph1 C-2,6), 129.2 (Ph1 C-3,5), 127.9 (Ph1 C-4), 127.4 (Ph2 C-3,5), 123.9 (Ph2 C-2,6), 38.6 (SCH<sub>2</sub>).

HRMS (ESI), *m/z*: calcd. for C<sub>13</sub>H<sub>12</sub>NO<sub>2</sub>S<sub>2</sub><sup>+</sup>: 278.0304 [M+H]<sup>+</sup>; found: 278.0306.

#### 4-[(Phenylsulfanyl)methyl]sulfanyl aniline (**8**)

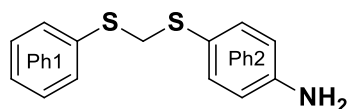

By following general procedure 1, starting from *S*-phenyl benzenesulfonothioate (250 mg, 0.20 mL, 1.0 mmol, 1.0 equiv), ClCH<sub>2</sub>I (353 mg, 0.15 mL, 2.0 mmol, 2.0 equiv), MeLi-LiBr complex (0.8 mL of 2.2 M in Et<sub>2</sub>O, 1.8 mmol, 1.8 equiv) in THF (5 mL), followed by the addition of 4-aminobenzene-1-thiol (168 mg, 1.3 mmol, 1.3 equiv) and NaI (15 mg, 0.1 mmol, 0.1 equiv) in dry DMF (3 mL),

compound **8** was obtained in 88% yield (218 mg) as yellow solid (m.p.: 50 °C) after chromatography on silica gel (70:30 v/v, dichloromethane/*n*-hexane).

**<sup>1</sup>H NMR** (400 MHz, CDCl<sub>3</sub>) δ: 7.40 (m, 2H, Ph1 H-2,6), 7.31 (m, 2H, Ph2 H-3,5), 7.30 (m, 2H, Ph1 H-3,5), 7.23 (m, 1H, Ph1 H-4); 6.64 (m, 2H, Ph2 H-2,6), 4.21 (s, 2H, SCH<sub>2</sub>), 3.78 (brs, 2H, NH<sub>2</sub>).

**<sup>13</sup>C NMR** (100 MHz, CDCl<sub>3</sub>) δ: 146.5 (Ph2 C-1), 135.4 (Ph1 C-1), 135.2 (Ph2 C-3,5), 130.2 (Ph1 C-2,6), 128.9 (Ph1 C-3,5), 126.7 (Ph1 C-4), 122.1 (Ph2 C-4), 115.6 (Ph2 C-2,6), 42.8 (SCH<sub>2</sub>).

**HRMS (ESI)**, *m/z*: calcd. for C<sub>13</sub>H<sub>14</sub>NS<sub>2</sub><sup>+</sup>: 248.0562 [M+H]<sup>+</sup>; found: 248.0562.

### 1,1'-(Methylenedisulfanyldiyl)dibenzene (**9**)<sup>[4]</sup>

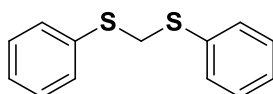

By following general procedure 1, starting from *S*-phenyl benzenesulfonylthioate (250 mg, 0.20 mL, 1.0 mmol, 1.0 equiv), ClCH<sub>2</sub>I (353 mg, 0.15 mL, 2.0 mmol, 2.0 equiv), MeLi-LiBr complex (0.8 mL of 2.2 M in Et<sub>2</sub>O, 1.8 mmol, 1.8 equiv) in THF (5 mL), followed by the addition of benzenethiol (143 mg, 0.13 mL, 1.3 mmol, 1.3 equiv) and NaI (15 mg, 0.1 mmol, 0.1 equiv) in dry DMF (3 mL), compound **9** was obtained in 93% yield (216 mg) as orange oil after filtration on silica gel.

**<sup>1</sup>H NMR** (400 MHz, CDCl<sub>3</sub>) δ: 7.43 (m, 4H, Ph H-2,6), 7.32 (m, 4H, Ph H-3,5), 7.25 (m, 2H, Ph H-4), 4.35 (s, 2H, SCH<sub>2</sub>).

**<sup>13</sup>C NMR** (100 MHz, CDCl<sub>3</sub>) δ: 135.0 (Ph C-1), 130.7 (Ph C-2,6), 129.0 (Ph C-3,5), 127.1 (Ph C-4), 40.6 (SCH<sub>2</sub>).

**HRMS (ESI)**, *m/z*: calcd. for C<sub>13</sub>H<sub>12</sub>NaS<sub>2</sub><sup>+</sup>: 255.0273 [M+Na]<sup>+</sup>; found: 255.0272.

### 2-[[Phenylsulfanyl)methyl]sulfanyl]naphthalene (**10**)

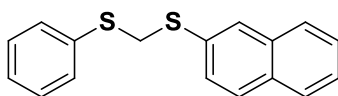

By following general procedure 1, starting from *S*-phenyl benzenesulfonylthioate (250 mg, 0.20 mL, 1.0 mmol, 1.0 equiv), ClCH<sub>2</sub>I (353 mg, 0.15 mL, 2.0 mmol, 2.0 equiv), MeLi-LiBr complex (0.8 mL of 2.2 M in Et<sub>2</sub>O, 1.8 mmol, 1.8 equiv) in THF (5 mL), followed by the addition of naphthalene-2-thiol (208 mg, 1.3 mmol, 1.3 equiv) and NaI (15 mg, 0.1 mmol, 0.1 equiv) in dry DMF (3 mL), compound **10** was obtained in 95% yield (268 mg) as orange solid (m.p.: 29 °C) after recrystallization with diethyl ether.

**<sup>1</sup>H NMR** (400 MHz, CDCl<sub>3</sub>) δ: 7.87 (m, 1H, Naph H-1), 7.81 (m, 1H, Naph H-5), 7.78 (m, 1H, Naph H-4), 7.77 (m, 1H, Naph H-8), 7.49 (m, 1H, Naph H-7), 7.48 (m, 1H, Naph H-3), 7.47 (m, 1H, Naph H-6), 7.45 (m, 2H, Ph H-2,6), 7.32 (m, 2H, Ph H-3,5), 7.26 (m, Ph H-4), 4.45 (s, 2H, SCH<sub>2</sub>).



**<sup>13</sup>C NMR** (100 MHz, CDCl<sub>3</sub>) δ: 134.9 (Ph C-1), 133.6 (Naph C-8a), 132.4 (Naph C-2), 132.2 (Naph C-4a), 130.8 (Ph C-2,6), 129.1 (Naph C-1), 129.0 (Ph C-3,5), 128.6 (Naph C-4), 128.1 (Naph C-3), 127.7 (Naph C-5), 127.4 (Naph C-8), 127.2 (Ph C-4), 126.6 (Naph C-7), 126.1 (Naph C-6), 40.5 (SCH<sub>2</sub>).

**HRMS (ESI)**, *m/z*: calcd. for C<sub>17</sub>H<sub>14</sub>NaS<sub>2</sub><sup>+</sup>: 305.0429 [M+Na]<sup>+</sup>; found: 305.0429.

### {[(Cyclopentylsulfanyl)methyl]sulfanyl}benzene (**11**)

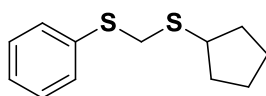

By following general procedure 1, starting from *S*-phenyl benzenesulfonylthioate (250 mg, 0.20 mL, 1.0 mmol, 1.0 equiv), ClCH<sub>2</sub>I (353 mg, 0.15 mL, 2.0 mmol, 2.0 equiv), MeLi-LiBr complex (0.8 mL of 2.2 M in Et<sub>2</sub>O, 1.8 mmol, 1.8 equiv) in THF (5 mL), followed by the addition of cyclopentanethiol (133 mg, 0.14 mL, 1.3 mmol, 1.3 equiv) and NaI (15 mg, 0.1 mmol, 0.1 equiv) in dry DMF (3 mL), compound **11** was obtained in 87% yield (213 mg) as colourless oil after chromatography on silica gel (*n*-hexane).

**<sup>1</sup>H NMR** (400 MHz, CDCl<sub>3</sub>) δ: 7.42 (m, 2H, Ph H-2,6), 7.31 (m, 2H, Ph H-3,5), 7.23 (m, 1H, Ph H-4), 4.05 (s, 2H, SCH<sub>2</sub>), 3.37 (m, 1H, Cyclopent H-1), 2.03 (m, 2H, Cyclopent H-2,5), 1.74 (m, 2H, Cyclopent H-3,4), 1.59 (m, 2H, Cyclopent H-3,4), 1.56 (m, 2H, Cyclopent H-2,5).

**<sup>13</sup>C NMR** (100 MHz, CDCl<sub>3</sub>) δ: 135.7 (Ph C-1), 130.2 (Ph C-2,6), 128.9 (Ph C-3,5), 126.7 (Ph C-4), 43.7 (Cyclopent C-1), 37.8 (SCH<sub>2</sub>), 33.4 (Cyclopent C-2,5), 24.8 (Cyclopent C-3,4).

**HRMS (ESI)**, *m/z*: calcd. for C<sub>12</sub>H<sub>16</sub>NaS<sub>2</sub><sup>+</sup>: 247.0586 [M+Na]<sup>+</sup>; found: 247.0587.

### {[(Cyclohexylsulfanyl)methyl]sulfanyl}benzene (**12**)<sup>[5]</sup>

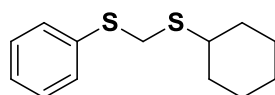

By following general procedure 1, starting from *S*-phenyl benzenesulfonylthioate (250 mg, 0.20 mL, 1.0 mmol, 1.0 equiv), ClCH<sub>2</sub>I (353 mg, 0.15 mL, 2.0 mmol, 2.0 equiv), MeLi-LiBr complex (0.8 mL of 2.2 M in Et<sub>2</sub>O, 1.8 mmol, 1.8 equiv) in THF (5 mL), followed by the addition of cyclohexanethiol (151 mg, 0.16 mL, 1.3 mmol, 1.3 equiv) and NaI (15 mg, 0.1 mmol, 0.1 equiv) in dry DMF (3 mL), compound **12** was obtained in 85% yield (203 mg) as colourless oil after chromatography on silica gel (95:05 *v/v*, *n*-hexane/dichloromethane).

**<sup>1</sup>H NMR** (400 MHz, CDCl<sub>3</sub>) δ: 7.42 (m, 2H, Ph H-2,6), 7.31 (m, 2H, Ph H-3,5), 7.23 (m, 1H, Ph H-4), 4.05 (s, 2H, SCH<sub>2</sub>), 2.93 (m, 1H, Cyclohex H-1), 1.99 (m, 2H, Cyclohex H-2,6), 1.77 (m, 2H, Cyclohex H-3,5), 1.62 (m, 1H, Cyclohex H-4), 1.36 (m, 2H, Cyclohex H-2,6), 1.31 (m, 2H, Cyclohex H-3,5), 1.30 (m, H, Cyclohex H-4).

**<sup>13</sup>C NMR** (100 MHz, CDCl<sub>3</sub>) δ: 135.8 (Ph C-1), 130.2 (Ph C-2,6), 128.9 (Ph C-3,5), 126.8 (Ph C-4), 43.3 (Cyclohex C-1), 36.1 (SCH<sub>2</sub>), 33.2 (Cyclohex C-2,6), 26.0 (Cyclohex C-3,5), 25.8 (Cyclohex C-4).

**HRMS (ESI),  $m/z$ :** calcd. for  $C_{13}H_{19}S_2^+$ : 239.0923  $[M+H]^+$ ; found: 239.0925.

**1,1',1''-{[(Phenylsulfanyl)methyl]sulfanyl}methanetriyl}tribenzene (13)**

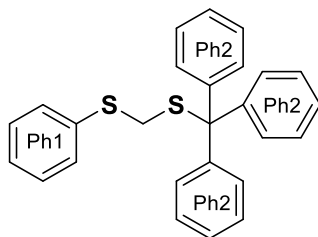

By following general procedure 1, starting from *S*-phenyl benzenesulfonylthioate (250 mg, 0.20 mL, 1.0 mmol, 1.0 equiv),  $ClCH_2I$  (353 mg, 0.15 mL, 2.0 mmol, 2.0 equiv), MeLi-LiBr complex (0.8 mL of 2.2 M in  $Et_2O$ , 1.8 mmol, 1.8 equiv) in THF (5 mL), followed by the addition of triphenylmethanethiol (359 mg, 1.3 mmol, 1.3 equiv) and NaI (15 mg, 0.1 mmol, 0.1 equiv) in dry DMF (3 mL), compound **13** was obtained in 96% yield (383 mg) as white solid (m.p.: 100 °C) after chromatography on silica gel (85:15 v/v, *n*-hexane/dichloromethane).

**$^1H$  NMR** (400 MHz,  $CDCl_3$ )  $\delta$ : 7.41 (m, 6H, Ph2 H-2,6), 7.33-7.22 (m, 5H, Ph1 H-2,3,4,5,6), 7.30 (m, 6H, Ph2 H-3,5), 7.24 (m, 3H, Ph H-4), 3.55 (s, 2H,  $SCH_2$ ).

**$^{13}C$  NMR** (100 MHz,  $CDCl_3$ )  $\delta$ : 144.2 (Ph2 C-1), 134.9 (Ph1 C-1), 130.1 (Ph1 C-2,6), 129.5 (Ph2 C-2,6), 128.8 (Ph1 C-3,5), 128.0 (Ph2 C-3,5), 126.80 (Ph1 C-4), 126.76 (Ph2 C-4), 68.0 ( $SC(Ph)_3$ ), 36.5 ( $SCH_2$ ).

**HRMS (ESI),  $m/z$ :** calcd. for  $C_{26}H_{22}NaS_2^+$ : 421.1055  $[M+Na]^+$ ; found: 421.1057.

**{[(Benzylsulfanyl)methyl]sulfanyl}benzene (14)<sup>[6]</sup>**

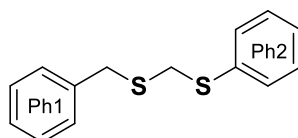

By following general procedure 1, starting from *S*-phenyl benzenesulfonylthioate (250 mg, 0.20 mL, 1.0 mmol, 1.0 equiv),  $ClCH_2I$  (353 mg, 0.15 mL, 2.0 mmol, 2.0 equiv), MeLi-LiBr complex (0.8 mL of 2.2 M in  $Et_2O$ , 1.8 mmol, 1.8 equiv) in THF (5 mL), followed by the addition of phenylmethanethiol (180 mg, 0.17 mL, 1.3 mmol, 1.3 equiv) and NaI (15 mg, 0.1 mmol, 0.1 equiv) in dry DMF (3 mL), compound **14** was obtained in 91% (224 mg) as a colorless oil after chromatography on silica gel (95:05 v/v, *n*-hexane/dichloromethane).

**$^1H$  NMR** (400 MHz,  $CDCl_3$ )  $\delta$ : 7.41 (m, 2H, Ph2 H-2,6), 7.32 (m, 6H, Ph2 H-3,5, Ph1 H-2,3,5,6), 7.25 (m, 2H, Ph2 H-4, Ph1 H-4), 3.88 (s, 2H,  $CH_2S$ ), 3.85 (s, 2H,  $SCH_2S$ ).

**$^{13}C$  NMR** (100 MHz,  $CDCl_3$ )  $\delta$ : 137.4 (Ph1 C-1), 135.0 (Ph2 C-1), 130.6 (Ph2 C-2,6), 129.1 (Ph1 C-2,6), 129.0 (Ph2 C-3,5), 128.6 (Ph1 C-3,5), 127.2 (Ph2 C-4), 127.0 (Ph1 C-4), 36.8 ( $SCH_2S$ ), 35.0 ( $CH_2S$ ).

**HRMS (ESI),  $m/z$ :** calcd. for  $C_{14}H_{15}S_2^+$ : 247.0610  $[M+H]^+$ ; found: 247.0612.

## 2-[[Phenylsulfanyl)methyl]sulfanyl]-1,3-benzoxazole (15)

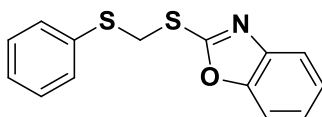

By following general procedure 1, starting from *S*-phenyl benzenesulfonothioate (250 mg, 0.20 mL, 1.0 mmol, 1.0 equiv), ClCH<sub>2</sub>I (353 mg, 0.15 mL, 2.0 mmol, 2.0 equiv), MeLi-LiBr complex (0.8 mL of 2.2 M in Et<sub>2</sub>O, 1.8 mmol, 1.8 equiv) in THF (5 mL), followed by the addition of 1,3-benzoxazole-2-thiol (197 mg, 1.3 mmol, 1.3 equiv) and NaI (15 mg, 0.1 mmol, 0.1 equiv) in dry DMF (3 mL), compound **15** was obtained in 86% yield (235 mg) as white solid (m.p.: 54 °C) after chromatography on silica gel (80:20 v/v, *n*-hexane/dichloromethane).

<sup>1</sup>H NMR (400 MHz, CDCl<sub>3</sub>) δ: 7.62 (m, 1H, Benzox H-4), 7.51 (m, 2H, Ph H-2,6), 7.43 (m, 1H, Benzox H-7), 7.33 (m, 2H, Ph H-3,5), 7.29 (m, 1H, Benzox H-5), 7.27 (m, 1H, Ph H-4), 7.25 (m, 1H, Benzox H-6), 4.77 (s, 2H, SCH<sub>2</sub>).

<sup>13</sup>C NMR (100 MHz, CDCl<sub>3</sub>) δ: 163.4 (Benzox C-2), 151.9 (Benzox C-7a), 141.8 (Benzox C-3a), 133.7 (Ph C-1), 131.5 (Ph C-2,6), 129.2 (Ph C-3,5), 127.9 (Ph C-4), 124.4 (Benzox C-5), 124.1 (Benzox C-6), 118.7 (Benzox C-4), 110.0 (Benzox C-7). 38.6 (SCH<sub>2</sub>).

HRMS (ESI), *m/z*: calcd. for C<sub>14</sub>H<sub>11</sub>NNaOS<sub>2</sub><sup>+</sup>: 296.0174 [M+Na]<sup>+</sup>; found:296.0174

## 1-Bromo-4-[[methylsulfanyl)methyl]sulfanyl]benzene (16)<sup>[7]</sup>

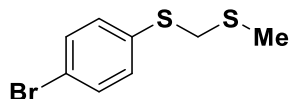

By following general procedure 1, starting from *S*-methyl methanesulfonothioate (126 mg, 0.11 mL, 1.0 mmol, 1.0 equiv), ClCH<sub>2</sub>I (353 mg, 0.15 mL, 2.0 mmol, 2.0 equiv), MeLi-LiBr complex (0.8 mL of 2.2 M in Et<sub>2</sub>O, 1.8 mmol, 1.8 equiv) in THF (5 mL), followed by the addition of 4-bromobenzene-1-thiol (246 mg, 1.3 mmol, 1.3 equiv) and NaI (15 mg, 0.1 mmol, 0.1 equiv) in dry DMF (3 mL), compound **16** was obtained in 95% yield (237 mg) as yellow oil after filtration on silica gel.

<sup>1</sup>H NMR (400 MHz, CDCl<sub>3</sub>) δ: 7.43 (m, 2H, Ph H-2,6), 7.29 (m, 2H, Ph H-3,5), 3.97 (s, 2H, SCH<sub>2</sub>S), 2.22 (s, 3H, SCH<sub>3</sub>).

<sup>13</sup>C NMR (100 MHz, CDCl<sub>3</sub>) δ: 134.2 (Ph C-4), 132.2 (Ph C-3,5), 132.0 (Ph C-2,6), 121.0 (Ph C-1), 40.4 (SCH<sub>2</sub>S), 15.1 (SCH<sub>3</sub>).

HRMS (ESI), *m/z*: calcd. for C<sub>8</sub>H<sub>10</sub>BrS<sub>2</sub><sup>+</sup>: 248.9402 [M+H]<sup>+</sup>; found: 248.9405.

## 1-Chloro-4-[[methylsulfanyl)methyl]sulfanyl]benzene (17)<sup>[8]</sup>

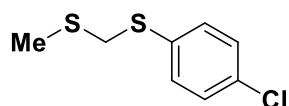

By following general procedure 1, starting from *S*-methyl methanesulfonylthioate (126 mg, 0.11 mL, 1.0 mmol, 1.0 equiv), ClCH<sub>2</sub>I (353 mg, 0.15 mL, 2.0 mmol, 2.0 equiv), MeLi-LiBr complex (0.8 mL of 2.2 M in Et<sub>2</sub>O, 1.8 mmol, 1.8 equiv) in THF (5 mL), followed by the addition of 4-chlorobenzene-1-thiol (188 mg, 1.3 mmol, 1.3 equiv) and NaI (15 mg, 0.1 mmol, 0.1 equiv) in dry DMF (3 mL), compound **17** was obtained in 93% yield (190 mg) as yellow oil after filtration on silica gel.

<sup>1</sup>H NMR (400 MHz, CDCl<sub>3</sub>) δ: 7.36 (m, 2H, Ph H-3,5), 7.29 (m, 2H, Ph H-2,6), 3.97 (s, 2H, SCH<sub>2</sub>), 2.22 (s, 3H, CH<sub>3</sub>S).

<sup>13</sup>C NMR (100 MHz, CDCl<sub>3</sub>) δ: 133.5 (Ph C-4), 133.2 (Ph C-1), 132.1 (Ph C-3,5), 129.1 (Ph C-2,6), 40.7 (SCH<sub>2</sub>), 15.1 (CH<sub>3</sub>S).

HRMS (ESI), *m/z*: calcd. for C<sub>8</sub>H<sub>10</sub>ClS<sub>2</sub><sup>+</sup>: 204.9907 [M+H]<sup>+</sup>; found: 204.9905.

### 1,3-Dichloro-2-[[[(methylsulfonyl)methyl]sulfonyl]benzene (**18**)

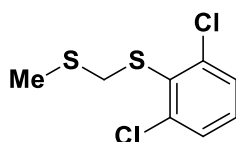

By following general procedure 1, starting from *S*-methyl methanesulfonylthioate (126 mg, 0.11 mL, 1.0 mmol, 1.0 equiv), ClCH<sub>2</sub>I (353 mg, 0.15 mL, 2.0 mmol, 2.0 equiv), MeLi-LiBr complex (0.8 mL of 2.2 M in Et<sub>2</sub>O, 1.8 mmol, 1.8 equiv) in THF (5 mL), followed by the addition of 2,6-dichlorobenzene-1-thiol (233 mg, 1.3 mmol, 1.3 equiv) and NaI (15 mg, 0.1 mmol, 0.1 equiv) in dry DMF (3 mL), compound **18** was obtained in 91% yield (218 mg) as yellow oil after filtration on silica gel.

<sup>1</sup>H NMR (400 MHz, CDCl<sub>3</sub>) δ: 7.39 (m, 2H, Ph H-4,6), 7.21 (m, 1H, Ph H-5), 4.04 (s, 2H, SCH<sub>2</sub>), 2.30 (s, 3H, SCH<sub>3</sub>).

<sup>13</sup>C NMR (100 MHz, CDCl<sub>3</sub>) δ: 141.6 (Ph C-1,3), 131.9 (Ph C-2), 130.3 (Ph C-5), 128.6 (Ph C-4,6), 41.1 (SCH<sub>2</sub>), 15.6 (CH<sub>3</sub>S).

HRMS (ESI), *m/z*: calcd. for C<sub>8</sub>H<sub>9</sub>Cl<sub>2</sub>S<sub>2</sub><sup>+</sup>: 238.9517 [M+H]<sup>+</sup>; found: 238.9518.

### 1-Fluoro-3-[[[(methylsulfonyl)methyl]sulfonyl]benzene (**19**)

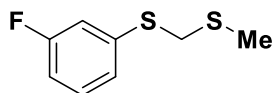

By following general procedure 1, starting from *S*-methyl methanesulfonylthioate (126 mg, 0.11 mL, 1.0 mmol, 1.0 equiv), ClCH<sub>2</sub>I (353 mg, 0.15 mL, 2.0 mmol, 2.0 equiv), MeLi-LiBr complex (0.8 mL of 2.2 M in Et<sub>2</sub>O, 1.8 mmol, 1.8 equiv) in THF (5 mL), followed by the addition of 3-fluorobenzene-1-thiol (167 mg, 0.14 mL, 1.3 mmol, 1.3 equiv) and NaI (15 mg, 0.1 mmol, 0.1 equiv) in dry DMF (3 mL), compound **19** was obtained in 94% yield (177 mg) as brown oil after filtration on silica gel.

<sup>1</sup>H NMR (400 MHz, CDCl<sub>3</sub>) δ: 7.27 (m, 1H, Ph H-5), 7.17 (m, 1H, Ph H-4), 7.13 (m, 1H, Ph H-2), 6.92 (m, 1H, Ph H-6), 4.01 (s, 2H, SCH<sub>2</sub>S), 2.24 (s, 3H, SCH<sub>3</sub>).

**<sup>13</sup>C NMR** (100 MHz, CDCl<sub>3</sub>) δ: 162.7 (d, *J* = 248.4 Hz, Ph C-1), 137.6 (d, *J* = 7.8 Hz, Ph C-3), 130.1 (d, *J* = 8.5 Hz, Ph C-5), 125.4 (d, *J* = 3.0 Hz, Ph C-4), 116.7 (d, *J* = 23.0 Hz, Ph C-2), 113.7 (d, *J* = 21.2 Hz, Ph C-6), 39.8 (SCH<sub>2</sub>S), 15.2 (SCH<sub>3</sub>).

**<sup>19</sup>F NMR** (376 MHz, CDCl<sub>3</sub>) δ: -112.0 (m, F).

**HRMS (ESI)**, *m/z*: calcd. for C<sub>8</sub>H<sub>10</sub>FS<sub>2</sub><sup>+</sup>: 189.0202 [M+H]<sup>+</sup>; found: 189.0201.

#### 1-[[[(Methylsulfonyl)methyl]sulfonyl]-4-nitrobenzene (20)

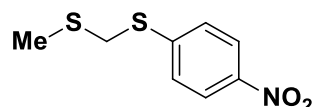

By following general procedure 1, starting from *S*-methyl methanesulfonylthioate (126 mg, 0.11 mL, 1.0 mmol, 1.0 equiv), ClCH<sub>2</sub>I (353 mg, 0.15 mL, 2.0 mmol, 2.0 equiv), MeLi-LiBr complex (0.8 mL of 2.2 M in Et<sub>2</sub>O, 1.8 mmol, 1.8 equiv) in THF (5 mL), followed by the addition of 4-nitrobenzene-1-thiol (202 mg, 1.3 mmol, 1.3 equiv) and NaI (15 mg, 0.1 mmol, 0.1 equiv) in dry DMF (3 mL), compound **20** was obtained in 85% yield (183 mg) as orange oil after filtration on silica gel.

**<sup>1</sup>H NMR** (400 MHz, CDCl<sub>3</sub>) δ: 8.16 (m, 2H, Ph H-3,5), 7.43 (m, 2H, Ph H-2,6), 4.11 (s, 2H, SCH<sub>2</sub>), 2.26 (s, 3H, CH<sub>3</sub>S).

**<sup>13</sup>C NMR** (100 MHz, CDCl<sub>3</sub>) δ: 145.7 (Ph C-1), 127.5 (Ph C-2,6), 123.9 (Ph C-3,5), 38.0 (SCH<sub>2</sub>), 15.4 (CH<sub>3</sub>S).

**<sup>15</sup>N NMR** (40MHz, CDCl<sub>3</sub>) δ: -12.8 (NO<sub>2</sub>).

**HRMS (ESI)**, *m/z*: calcd. for C<sub>8</sub>H<sub>10</sub>NO<sub>2</sub>S<sub>2</sub><sup>+</sup>: 216.0147 [M+H]<sup>+</sup>; found: 216.0149.

#### 4-[[[(Methylsulfonyl)methyl]sulfonyl]aniline (21)

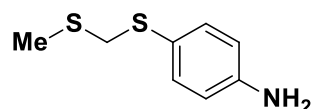

By following general procedure 1, starting from *S*-methyl methanesulfonylthioate (126 mg, 0.11 mL, 1.0 mmol, 1.0 equiv), ClCH<sub>2</sub>I (353 mg, 0.15 mL, 2.0 mmol, 2.0 equiv), MeLi-LiBr complex (0.8 mL of 2.2 M in Et<sub>2</sub>O, 1.8 mmol, 1.8 equiv) in THF (5 mL), followed by the addition of 4-aminobenzene-1-thiol (168 mg, 1.3 mmol, 1.3 equiv) and NaI (15 mg, 0.1 mmol, 0.1 equiv) in dry DMF (3 mL), compound **21** was obtained in 87% yield (161 mg) as brown oil after chromatography on silica gel (70:30 v/v, dichloromethane/*n*-hexane).

**<sup>1</sup>H NMR** (400 MHz, CDCl<sub>3</sub>) δ: 7.31 (m, 2H, Ph H-3,5), 6.64 (m, 2H, Ph H-2,6), 4.20-3.20 (brs, 2H, NH<sub>2</sub>), 3.84 (s, 2H, SCH<sub>2</sub>), 2.20 (s, 3H, CH<sub>3</sub>S).

**<sup>13</sup>C NMR** (100 MHz, CDCl<sub>3</sub>) δ: 146.5 (Ph C-1), 135.1 (Ph C-3,5), 122.1 (Ph C-4), 115.5 (Ph C-2,6), 43.0 (SCH<sub>2</sub>), 15.0 (CH<sub>3</sub>S).

**HRMS (ESI)**, *m/z*: calcd. for C<sub>8</sub>H<sub>12</sub>NS<sub>2</sub><sup>+</sup>: 186.0406 [M+H]<sup>+</sup>; found: 186.0408.

### 1-((Methylsulfanyl)methyl)sulfanylbenzene (**22**)<sup>[9]</sup>

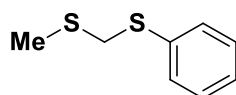

By following general procedure 1, starting from *S*-methyl methanesulfonylthioate (126 mg, 0.11 mL, 1.0 mmol, 1.0 equiv), ClCH<sub>2</sub>I (353 mg, 0.15 mL, 2.0 mmol, 2.0 equiv), MeLi-LiBr complex (0.8 mL of 2.2 M in Et<sub>2</sub>O, 1.8 mmol, 1.8 equiv) in THF (5 mL), followed by the addition of benzenethiol (143 mg, 0.13 mL, 1.3 mmol, 1.3 equiv) and NaI (15 mg, 0.1 mmol, 0.1 equiv) in dry DMF (3 mL), compound **22** was obtained in 96% yield (163 mg) as light yellow oil after filtration on silica gel.

<sup>1</sup>H NMR (400 MHz, CDCl<sub>3</sub>) δ: 7.43 (m, 2H, Ph H-2,6), 7.32 (m, 2H, Ph H-3,5), 7.25 (m, 1H, Ph H-4), 4.01 (s, 2H, SCH<sub>2</sub>), 2.23 (s, 3H, SCH<sub>3</sub>).

<sup>13</sup>C NMR (100 MHz, CDCl<sub>3</sub>) δ: 135.1 (Ph C-1), 130.6 (Ph C-2,6), 128.9 (Ph C-3,5), 127.0 (Ph C-4), 40.4 (SCH<sub>2</sub>), 15.2 (CH<sub>3</sub>S).

HRMS (ESI), *m/z*: calcd. for C<sub>8</sub>H<sub>10</sub>NaS<sub>2</sub><sup>+</sup>: 193.0116 [M+Na]<sup>+</sup>; found: 193.0117.

### 1-Methyl-4-(((methylsulfanyl)methyl)sulfanyl)benzene (**23**)<sup>[8]</sup>

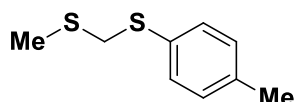

By following general procedure 1, starting from *S*-methyl methanesulfonylthioate (126 mg, 0.11 mL, 1.0 mmol, 1.0 equiv), ClCH<sub>2</sub>I (353 mg, 0.15 mL, 2.0 mmol, 2.0 equiv), MeLi-LiBr complex (0.8 mL of 2.2 M in Et<sub>2</sub>O, 1.8 mmol, 1.8 equiv) in THF (5 mL), followed by the addition of 4-methylbenzene-1-thiol (162 mg, 1.3 mmol, 1.3 equiv) and NaI (15 mg, 0.1 mmol, 0.1 equiv) in dry DMF (3 mL), compound **23** was obtained in 94% yield (173 mg) as yellow oil after filtration on silica gel.

<sup>1</sup>H NMR (400 MHz, CDCl<sub>3</sub>) δ: 7.35 (m, 2H, Ph H-3,5), 7.14 (m, 2H, Ph H-2,6), 3.96 (s, 2H, SCH<sub>2</sub>), 2.34 (s, 3H, CH<sub>3</sub>), 2.22 (s, 3H, CH<sub>3</sub>S).

<sup>13</sup>C NMR (100 MHz, CDCl<sub>3</sub>) δ: 137.3 (Ph C-1), 131.5 (Ph C-3,5), 131.2 (Ph C-4), 129.7 (Ph C-2,6), 41.2 (SCH<sub>2</sub>), 21.1 (CH<sub>3</sub>), 15.1 (CH<sub>3</sub>S).

HRMS (ESI), *m/z*: calcd. for C<sub>9</sub>H<sub>13</sub>S<sub>2</sub><sup>+</sup>: 185.0453 [M+H]<sup>+</sup>; found: 185.0456.

### 1-(2-Methyl-2-propanyl)-4-(((methylsulfanyl)methyl)sulfanyl)methylbenzene (**24**)

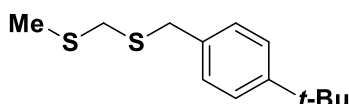

By following general procedure 1, starting from *S*-methyl methanesulfonylthioate (126 mg, 0.11 mL, 1.0 mmol, 1.0 equiv), ClCH<sub>2</sub>I (353 mg, 0.15 mL, 2.0 mmol, 2.0 equiv), MeLi-LiBr complex (0.8 mL of 2.2 M in Et<sub>2</sub>O, 1.8 mmol, 1.8 equiv) in THF (5 mL), followed by the addition of (4-*tert*-butylphenyl)methanethiol (234 mg, 0.24 mL, 1.3 mmol, 1.3 equiv) and NaI (15 mg, 0.1 mmol, 0.1

equiv) in dry DMF (3 mL), compound **24** was obtained in 89% yield (214 mg) as yellow oil after chromatography on silica gel (90:10 v/v, *n*-hexane/dichloromethane).

**<sup>1</sup>H NMR** (400 MHz, CDCl<sub>3</sub>) δ: 7.34 (m, 2H, Ph H-2,6), 7.26 (m, 2H, Ph H-3,5), 3.80 (s, 2H, CH<sub>2</sub>S), 3.52 (s, 2H, SCH<sub>2</sub>S), 2.18 (s, 3H, SCH<sub>3</sub>), 1.32 (s, 9H, C(CH<sub>3</sub>)<sub>3</sub>).

**<sup>13</sup>C NMR** (100 MHz, CDCl<sub>3</sub>) δ: 149.9(Ph C-1), 134.5 (Ph C-4), 128.7 (Ph C-3,5), 125.4 (Ph C-2,6), 36.8 (SCH<sub>2</sub>S), 34.5 (C(CH<sub>3</sub>)<sub>3</sub>), 33.7 (CH<sub>2</sub>S), 31.3 (C(CH<sub>3</sub>)<sub>3</sub>) 14.4 (SCH<sub>3</sub>).

**HRMS (ESI)**, *m/z*: calcd. for C<sub>13</sub>H<sub>21</sub>S<sub>2</sub><sup>+</sup>: 241.1079 [M+H]<sup>+</sup>; found: 241.1078.

### 1-Chloro-4-(((methylsulfonyl)methyl)sulfonyl)methyl)benzene (**25**)

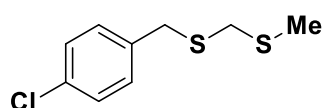

By following general procedure 1, starting from *S*-methyl methanesulfonylthioate (126 mg, 0.11 mL, 1.0 mmol, 1.0 equiv), ClCH<sub>2</sub>I (353 mg, 0.15 mL, 2.0 mmol, 2.0 equiv), MeLi-LiBr complex (0.8 mL of 2.2 M in Et<sub>2</sub>O, 1.8 mmol, 1.8 equiv) in THF (5 mL), followed by the addition of (4-chlorophenyl)methanethiol (206 mg, 0.17 mL, 1.3 mmol, 1.3 equiv) and NaI (15 mg, 0.1 mmol, 0.1 equiv) in dry DMF (3 mL), compound **25** was obtained in 87% yield (190 mg) as colourless oil after chromatography on silica gel (80:20 v/v, *n*-hexane/dichloromethane).

**<sup>1</sup>H NMR** (400 MHz, CDCl<sub>3</sub>) δ: 7.28 (m, 4H, Ph H-2,3,5,6), 3.78 (s, 2H, CH<sub>2</sub>S), 3.47 (s, 2H, SCH<sub>2</sub>S), 2.16 (s, 3H, SCH<sub>3</sub>).

**<sup>13</sup>C NMR** (100 MHz, CDCl<sub>3</sub>) δ: 136.2 (Ph C-4), 132.8 (Ph C-1), 130.4 (Ph C-3,5), 128.6 (Ph C-2,6), 36.6 (SCH<sub>2</sub>S), 33.4 (CH<sub>2</sub>S), 14.3 (SCH<sub>3</sub>).

**HRMS (ESI)**, *m/z*: calcd. for C<sub>9</sub>H<sub>12</sub>ClS<sub>2</sub><sup>+</sup>: 219.0063 [M+H]<sup>+</sup>; found: 219.0060.

### (((Methylsulfonyl)methyl)sulfonyl)cyclopentane (**26**)

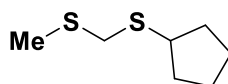

By following general procedure 1, starting from *S*-methyl methanesulfonylthioate (126 mg, 0.11 mL, 1.0 mmol, 1.0 equiv), ClCH<sub>2</sub>I (353 mg, 0.15 mL, 2.0 mmol, 2.0 equiv), MeLi-LiBr complex (0.8 mL of 2.2 M in Et<sub>2</sub>O, 1.8 mmol, 1.8 equiv) in THF (5 mL), followed by the addition of cyclopentanethiol (133 mg, 0.14 mL, 1.3 mmol, 1.3 equiv) and NaI (15 mg, 0.1 mmol, 0.1 equiv) in dry DMF (3 mL), compound **26** was obtained in 83% yield (135mg) as colourless oil after chromatography on silica gel (*n*-hexane).

**<sup>1</sup>H NMR** (400 MHz, CDCl<sub>3</sub>) δ: 3.66 (s, 2H, SCH<sub>2</sub>), 3.30 (m, 1H, Cyclopent H-1), 2.19 (s, 3H, CH<sub>3</sub>S), 2.02 (m, 2H, Cyclopent H-2,5), 1.74 (m, 2H, Cyclopent H-3,4), 1.59 (m, 2H, Cyclopent H-3,4).1.55 (m, 2H, Cyclopent H-2,5).

**<sup>13</sup>C NMR** (100 MHz, CDCl<sub>3</sub>) δ: 42.9 (Cyclopent C-1), 37.7 (SCH<sub>2</sub>), 33.4 (Cyclopent C-2,5), 24.8 (Cyclopent C-3,4), 14.8 (CH<sub>3</sub>S).

**HRMS (ESI)**, *m/z*: calcd. for C<sub>7</sub>H<sub>15</sub>S<sub>2</sub><sup>+</sup>: 163.0610 [M+H]<sup>+</sup>; found: 163.0608.

### {[(Methylsulfanyl)methyl]sulfanyl}cyclohexane (**27**)

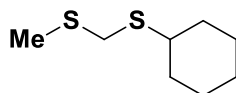

By following general procedure 1, starting from *S*-methyl methanesulfonylthioate (126 mg, 0.11 mL, 1.0 mmol, 1.0 equiv), ClCH<sub>2</sub>I (353 mg, 0.15 mL, 2.0 mmol, 2.0 equiv), MeLi-LiBr complex (0.8 mL of 2.2 M in Et<sub>2</sub>O, 1.8 mmol, 1.8 equiv) in THF (5 mL), followed by the addition of cyclohexanethiol (151 mg, 0.16 mL, 1.3 mmol, 1.3 equiv) and NaI (15 mg, 0.1 mmol, 0.1 equiv) in dry DMF (3 mL), compound **27** was obtained in 88% yield (155 mg) as colourless oil after chromatography on silica gel (95:05 *v/v*, *n*-hexane/dichloromethane).

**<sup>1</sup>H NMR** (400 MHz, CDCl<sub>3</sub>) δ: 3.67 (s, 2H, SCH<sub>2</sub>), 2.87 (m, 1H, Cyclohex H-1), 2.18 (s, 3H, CH<sub>3</sub>S), 1.97 (m, 2H, Cyclohex H-2,6), 1.77 (m, 2H, Cyclohex H-3,5), 1.61 (m, 1H, Cyclohex H-4), 1.37 (m, 2H, Cyclohex H-2,6), 1.31 (m, 2H, Cyclohex H-3,5), 1.28 (m, 1H, Cyclohex H-4).

**<sup>13</sup>C NMR** (100 MHz, CDCl<sub>3</sub>) δ: 42.4 (Cyclohex C-1), 36.0 (SCH<sub>2</sub>), 33.2 (Cyclohex C-2,6), 26.0 (Cyclohex C-3,5), 25.8 (Cyclohex C-4), 14.7 (CH<sub>3</sub>S).

**HRMS (ESI)**, *m/z*: calcd. for C<sub>8</sub>H<sub>16</sub>NaS<sub>2</sub><sup>+</sup>: 199.0586 [M+Na]<sup>+</sup>; found:199.0587.

### 1,1',1''-{[(Methylsulfanyl)methyl]sulfanyl}methanetriyltribenzene (**28**)

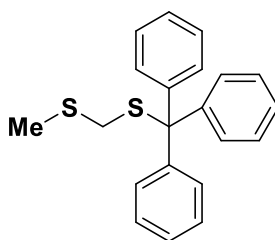

By following general procedure 1, starting from *S*-methyl methanesulfonylthioate (126 mg, 0.11 mL, 1.0 mmol, 1.0 equiv), ClCH<sub>2</sub>I (353 mg, 0.15 mL, 2.0 mmol, 2.0 equiv), MeLi-LiBr complex (0.8 mL of 2.2 M in Et<sub>2</sub>O, 1.8 mmol, 1.8 equiv) in THF (5 mL), followed by the addition of triphenylmethanethiol (359 mg, 1.3 mmol, 1.3 equiv) and NaI (15 mg, 0.1 mmol, 0.1 equiv) in dry DMF (3 mL), compound **28** was obtained in 91% yield (306 mg) as white solid (m.p.: 83 °C) after chromatography on silica gel (70:30 *v/v*, *n*-hexane/dichloromethane).

**<sup>1</sup>H NMR** (400 MHz, CDCl<sub>3</sub>) δ: 7.42 (m, 6H, Ph H-2,6), 7.29 (m, 6H, Ph H-3,5), 7.22 (m, 3H, Ph H-4), 3.17 (s, 2H, SCH<sub>2</sub>), 2.10 (s, 3H, CH<sub>3</sub>S).

**<sup>13</sup>C NMR** (100 MHz, CDCl<sub>3</sub>) δ: 144.4 (Ph C-1), 129.5 (Ph C-2,6), 128.0 (Ph C-3,5), 126.8 (Ph C-4), 67.7 (SC(Ph)<sub>3</sub>), 36.4 (SCH<sub>2</sub>), 15.7 (CH<sub>3</sub>S).



**HRMS (ESI),  $m/z$ :** calcd. for  $C_{21}H_{20}NaS_2^+$ : 359.0899  $[M+Na]^+$ ; found: 359.0898

### 1-[[[(Methylsulfonyl)methyl]sulfonyl]adamantane (29)

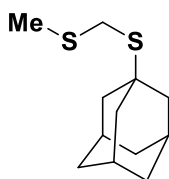

By following general procedure 1, starting from *S*-methyl methanesulfonylthioate (126 mg, 0.11 mL, 1.0 mmol, 1.0 equiv),  $ClCH_2I$  (353 mg, 0.15 mL, 2.0 mmol, 2.0 equiv), MeLi-LiBr complex (0.8 mL of 2.2 M in  $Et_2O$ , 1.8 mmol, 1.8 equiv) in THF (5 mL), followed by the addition of adamantane-1-thiol (219 mg, 1.3 mmol, 1.3 equiv) and NaI (15 mg, 0.1 mmol, 0.1 equiv) in dry DMF (3 mL), compound **29** was obtained in 87% yield (199 mg) as yellow oil after chromatography on silica gel (90:10 v/v, *n*-hexane/dichloromethane).

**$^1H$  NMR** (400 MHz,  $CDCl_3$ )  $\delta$ : 3.61 (s, 2H,  $SCH_2$ ), 2.14 (s, 3H,  $CH_3S$ ), 1.99 (m, 3H, Adam H-3,5,7), 1.86 (m, 6H, Adam H-2,8,9), 1.63 (m, 6H, Adam H-4,6,10).

**$^{13}C$  NMR** (100 MHz,  $CDCl_3$ )  $\delta$ : 45.4 (Adam C-1), 43.3 (Adam C-2,8,9), 36.1 (Adam C-4,6,10), 31.6 ( $SCH_2$ ), 29.5 (Adam C-3,5,7), 15.2 ( $CH_3S$ ).

**HRMS (ESI),  $m/z$ :** calcd. for  $C_{12}H_{20}NaS_2^+$ : 251.0899  $[M+Na]^+$ ; found: 251.0901.

### 2-[[[(Methylsulfonyl)methyl]sulfonyl]-1,3-benzoxazole (30)

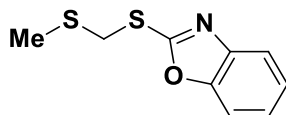

By following general procedure 1, starting from *S*-methyl methanesulfonylthioate (126 mg, 0.11 mL, 1.0 mmol, 1.0 equiv),  $ClCH_2I$  (353 mg, 0.15 mL, 2.0 mmol, 2.0 equiv), MeLi-LiBr complex (0.8 mL of 2.2 M in  $Et_2O$ , 1.8 mmol, 1.8 equiv) in THF (5 mL), followed by the addition of 1,3-benzoxazole-2-thiol (197 mg, 1.3 mmol, 1.3 equiv) and NaI (15 mg, 0.1 mmol, 0.1 equiv) in dry DMF (3 mL), compound **30** was obtained in 85% yield (180 mg) as colourless oil after chromatography on silica gel (94:06 v/v, *n*-hexane/ethyl acetate).

**$^1H$  NMR** (400 MHz,  $CDCl_3$ )  $\delta$ : 7.62 (m, 1H, Benzox H-4), 7.45 (m, 1H, Benzox H-7), 7.29 (m, 1H, Benzox H-5), 7.26 (m, 1H, Benzox H-6), 4.47 (s, 2H,  $SCH_2$ ), 2.30 (s, 3H,  $CH_3S$ ).

**$^{13}C$  NMR** (100 MHz,  $CDCl_3$ )  $\delta$ : 163.7 (Benzox C-2), 151.9 (Benzox C-7a), 141.8 (Benzox C-3a), 124.4 (Benzox C-5), 124.1 (Benzox C-6), 118.6 (Benzox C-4), 110.0 (Benzox C-7), 38.3 ( $SCH_2$ ), 15.8 ( $CH_3S$ ).

**HRMS (ESI),  $m/z$ :** calcd. for  $C_9H_9NNaOS_2^+$ : 234.0018  $[M+Na]^+$ ; found: 234.0021.

### 4,6-Dimethyl-2-[[[(methylsulfonyl)methyl]sulfonyl]pyrimidine (31)

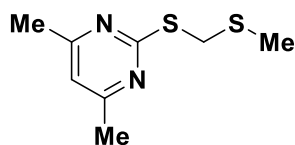

By following general procedure 1, starting from *S*-methyl methanesulfonothioate (126 mg, 0.11 mL, 1.0 mmol, 1.0 equiv), ClCH<sub>2</sub>I (353 mg, 0.15 mL, 2.0 mmol, 2.0 equiv), MeLi-LiBr complex (0.8 mL of 2.2 M in Et<sub>2</sub>O, 1.8 mmol, 1.8 equiv) in THF (5 mL), followed by the addition of 4,6-dimethylpyrimidine-2-thiol (182 mg, 1.3 mmol, 1.3 equiv) and NaI (15 mg, 0.1 mmol, 0.1 equiv) in dry DMF (3 mL), compound **31** was obtained in 91% yield (182 mg) as colourless oil after filtration on silica gel.

<sup>1</sup>H NMR (400 MHz, CDCl<sub>3</sub>) δ: 6.71 (s, 1H, Pyr H-5), 4.33 (s, 2H, SCH<sub>2</sub>S), 2.40 (s, 6H, CH<sub>3</sub>), 2.24 (s, 3H, SCH<sub>3</sub>).

<sup>13</sup>C NMR (100 MHz, CDCl<sub>3</sub>) δ: 169.9 (Pyr C-2), 167.1 (Pyr C-4,6), 116.0 (Pyr C-5), 36.3 (SCH<sub>2</sub>S), 23.8 (CH<sub>3</sub>), 15.4 (SCH<sub>3</sub>).

HRMS (ESI), *m/z*: calcd. for C<sub>8</sub>H<sub>13</sub>N<sub>2</sub>S<sub>2</sub><sup>+</sup>: 201.0515 [M+H]<sup>+</sup>; found: 201.0517.

### 2-[[[(Methylsulfanyl)methyl]sulfanyl]-5-[[3-(trifluoromethyl)benzyl]sulfanyl]-1,3,4-thiadiazole (32)

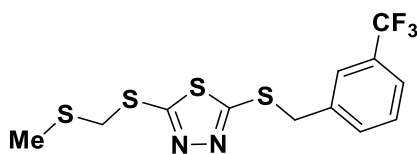

By following general procedure 1, starting from *S*-methyl methanesulfonothioate (126 mg, 0.11 mL, 1.0 mmol, 1.0 equiv), ClCH<sub>2</sub>I (353 mg, 0.15 mL, 2.0 mmol, 2.0 equiv), MeLi-LiBr complex (0.8 mL of 2.2 M in Et<sub>2</sub>O, 1.8 mmol, 1.8 equiv) in THF (5 mL), followed by the addition of 5-[[[3-(trifluoromethyl)phenyl]methyl]sulfanyl]-1,3,4-thiadiazole-2-thiol (401 mg, 1.3 mmol, 1.3 equiv) and NaI (15 mg, 0.1 mmol, 0.1 equiv) in dry DMF (3 mL), compound **32** was obtained in 95% yield (320 mg) as yellow oil after filtration on silica gel.

<sup>1</sup>H NMR (400 MHz, CDCl<sub>3</sub>) δ: 7.66 (brs, 1H, Ph H-2), 7.63 (brd, *J* = 7.7 Hz, 1H, Ph H-6), 7.54 (brd, *J* = 7.7 Hz, 1H, Ph H-4), 7.45 (m, 1H, Ph H-5), 4.57 (s, 2H, SCH<sub>2</sub>), 4.36 (s, 2H, SCH<sub>2</sub>S), 2.27 (s, 3H, CH<sub>3</sub>S).

<sup>13</sup>C NMR (100 MHz, CDCl<sub>3</sub>) δ: 164.5 (Thiadiaz C-5), 164.3 (Thiadiaz C-2), 137.1 (Ph C-1), 132.6 (q, *J* = 1.3 Hz, Ph C-6), 131.1 (q, *J* = 32.4 Hz, Ph C-3), 129.2 (Ph C-5), 125.9 (q, *J* = 3.8 Hz, Ph C-2), 124.7 (q, *J* = 3.8 Hz, Ph C-4), 123.8 (q, *J* = 272.4, CF<sub>3</sub>), 40.3 (SCH<sub>2</sub>S), 37.5 (SCH<sub>2</sub>), 15.7 (CH<sub>3</sub>S).

<sup>19</sup>F NMR (376 MHz, CDCl<sub>3</sub>) δ: -62.7 (s, CF<sub>3</sub>).

HRMS (ESI), *m/z*: calcd. for C<sub>12</sub>H<sub>12</sub>F<sub>3</sub>N<sub>2</sub>S<sub>4</sub><sup>+</sup>: 368.9830 [M+H]<sup>+</sup>; found: 368.9834.

### 1-Methoxy-4-[[[(phenylsulfanyl)methyl]sulfanyl]methyl]benzene (33)

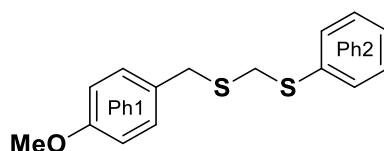

By following general procedure 1, starting from *S*-[(4-methoxyphenyl)methyl] 4-methylbenzene-1-sulfonothioate (308 mg, 0.20 mL, 1.0 mmol, 1.0 equiv),  $\text{ClCH}_2\text{I}$  (353 mg, 0.15 mL, 2.0 mmol, 2.0 equiv), MeLi-LiBr complex (0.8 mL of 2.2 M in  $\text{Et}_2\text{O}$ , 1.8 mmol, 1.8 equiv) in THF (5 mL), followed by the addition of benzenethiol (143 mg, 0.13 mL, 1.3 mmol, 1.3 equiv) and NaI (15 mg, 0.1 mmol, 0.1 equiv) in dry DMF (3 mL), compound **33** was obtained in 92% yield (254 mg) as pink oil after chromatography on silica gel (70:30 v/v, *n*-hexane/dichloromethane).

$^1\text{H NMR}$  (400 MHz,  $\text{CDCl}_3$ )  $\delta$ : 7.42 (m, 2H, Ph2 H-2,6), 7.32 (m, 2H, Ph2 H-3,5), 7.25 (m, 1H, Ph2 H-4), 7.24 (m, 2H, Ph1 H-3,5), 6.85 (m, 2H, Ph1 H-2,6), 3.86 (s, 2H,  $\text{SCH}_2\text{S}$ ), 3.85 (s, 2H,  $\text{CH}_2\text{S}$ ), 3.80 (s, 3H,  $\text{OCH}_3$ ).

$^{13}\text{C NMR}$  (100 MHz,  $\text{CDCl}_3$ )  $\delta$ : 158.7 (Ph1 C-1), 135.2 (Ph2 C-1), 130.5 (Ph2 C-2,6), 130.2 (Ph1 C-3,5), 129.2 (Ph1 C-4, Ph2 C-3,5), 126.9 (Ph2 C-4), 113.9 (Ph1 C-2,6), 55.2 ( $\text{OCH}_3$ ), 36.6 ( $\text{SCH}_2\text{S}$ ), 34.4 ( $\text{CH}_2\text{S}$ ).

**HRMS (ESI)**,  $m/z$ : calcd. for  $\text{C}_{15}\text{H}_{17}\text{OS}_2^+$ : 277.0715  $[\text{M}+\text{H}]^+$ ; found: 277.0716.

#### 1,1'-[Methylenebis(sulfanedimethylene)]dibenzene (**34**)<sup>[6]</sup>

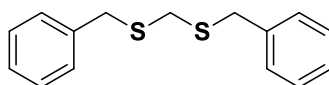

By following general procedure 1, starting from *S*-benzyl phenylmethanesulfonothioate (278 mg, 0.22 mL, 1.0 mmol, 1.0 equiv),  $\text{ClCH}_2\text{I}$  (353 mg, 0.15 mL, 2.0 mmol, 2.0 equiv), MeLi-LiBr complex (0.8 mL of 2.2 M in  $\text{Et}_2\text{O}$ , 1.8 mmol, 1.8 equiv) in THF (5 mL), followed by the addition of phenylmethanethiol (180 mg, 0.17 mL, 1.3 mmol, 1.3 equiv) and NaI (15 mg, 0.1 mmol, 0.1 equiv) in dry DMF (3 mL), compound **34** was obtained in 89% (232 mg) as a white solid (m.p.: 54 °C, lit. 55 °C) after chromatography on silica gel (95:05 v/v, *n*-hexane/dichloromethane).

$^1\text{H NMR}$  (400 MHz,  $\text{CDCl}_3$ )  $\delta$ : 7.31 (m, 8H, Ph H-2,3,5,6), 7.25 (m, 2H, Ph H-4), 3.84 (s, 4H,  $\text{PhCH}_2\text{S}$ ), 3.38 (s, 2H,  $\text{SCH}_2\text{S}$ ).

$^{13}\text{C NMR}$  (100 MHz,  $\text{CDCl}_3$ )  $\delta$ : 137.7 (Ph C-1), 129.1 (Ph C-2,6), 128.5 (Ph C-3,5), 127.0 (Ph C-4), 34.4 ( $\text{PhCH}_2\text{S}$ ), 33.4 ( $\text{SCH}_2\text{S}$ ).

**HRMS (ESI)**,  $m/z$ : calcd. for  $\text{C}_{15}\text{H}_{17}\text{S}_2^+$ : 261.0766  $[\text{M}+\text{H}]^+$ ; found: 261.0764.

#### Methyl 2-[[[(methylsulfanyl)methyl]sulfanyl]benzoate (**35**)

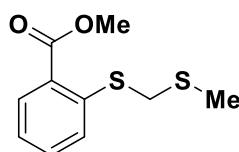

By following general procedure 1, starting from *S*-methyl methanesulfonylthioate (126 mg, 0.11 mL, 1.0 mmol, 1.0 equiv), ClCH<sub>2</sub>I (353 mg, 0.15 mL, 2.0 mmol, 2.0 equiv), MeLi-LiBr complex (0.8 mL of 2.2 M in Et<sub>2</sub>O, 1.8 mmol, 1.8 equiv) in THF (5 mL), followed by the addition of methyl 2-sulfanylbenzoate (219 mg, 0.18 mL, 1.3 mmol, 1.3 equiv) and NaI (15 mg, 0.1 mmol, 0.1 equiv) in dry DMF (3 mL), compound **35** was obtained in 95% yield (274 mg) as yellow oil after filtration on silica gel.

<sup>1</sup>H NMR (400 MHz, CDCl<sub>3</sub>) δ: 7.96 (m, 1H, Ph H-6), 7.47 (m, 1H, Ph H-4), 7.44 (m, 1H, Ph H-3), 7.20 (m, 1H, Ph H-5), 4.02 (s, 2H, SCH<sub>2</sub>S), 3.91 (s, 3H, OCH<sub>3</sub>), 2.26 (s, 3H, SCH<sub>3</sub>).

<sup>13</sup>C NMR (100 MHz, CDCl<sub>3</sub>) δ: 166.8 (C=O), 140.3 (Ph C-2), 132.3 (Ph C-4), 131.2 (Ph C-6), 128.3 (Ph C-1), 126.6 (Ph C-3), 124.5 (Ph C-5), 52.1 (OCH<sub>3</sub>), 37.6 (SCH<sub>2</sub>S), 15.6 (SCH<sub>3</sub>).

HRMS (ESI), *m/z*: calcd. for C<sub>10</sub>H<sub>13</sub>O<sub>2</sub>S<sub>2</sub><sup>+</sup>: 229.0351 [M+H]<sup>+</sup>; found: 229.0348.

### (((Prop-2-en-1-yl)sulfanyl)methyl)sulfanyl)benzene (**36**)<sup>[10]</sup>

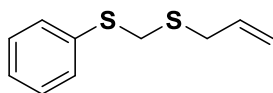

By following general procedure 1, starting from *S*-phenyl benzenesulfonylthioate (250 mg, 0.20 mL, 1.0 mmol, 1.0 equiv), ClCH<sub>2</sub>I (353 mg, 0.15 mL, 2.0 mmol, 2.0 equiv), MeLi-LiBr complex (0.8 mL of 2.2 M in Et<sub>2</sub>O, 1.8 mmol, 1.8 equiv) in THF (5 mL), followed by the addition of prop-2-ene-1-thiol (96 mg, 0.11 mL, 1.3 mmol, 1.3 equiv) and NaI (15 mg, 0.1 mmol, 0.1 equiv) in dry DMF (3 mL), compound **36** was obtained in 87% yield (171 mg) as yellow oil after chromatography on silica gel (80:20 v/v, *n*-hexane/dichloromethane).

<sup>1</sup>H NMR (200 MHz, CDCl<sub>3</sub>) δ: 7.45 (m, 2H, Ph H-2,6), 7.33 (m, 3H, Ph H-3,4,5), 5.79 (m, 1H, CH<sub>2</sub>CH=CH<sub>2</sub>), 5.15 (m, 2H, CH<sub>2</sub>CH=CH<sub>2</sub>), 3.99 (s, 2H, SCH<sub>2</sub>S), 3.33 (m, 2H, CH<sub>2</sub>CH=CH<sub>2</sub>).

<sup>13</sup>C NMR (50 MHz, CDCl<sub>3</sub>) δ: 135.1 (Ph C-1), 133.1 (CH<sub>2</sub>CH=CH<sub>2</sub>), 130.6 (Ph C-2,6), 128.9 (Ph C-3,5), 126.9 (Ph C-4), 118.1 (CH<sub>2</sub>CH=CH<sub>2</sub>), 36.3 (SCH<sub>2</sub>S), 33.6 (CH<sub>2</sub>CH=CH<sub>2</sub>).

HRMS (ESI), *m/z*: calcd. for C<sub>10</sub>H<sub>13</sub>S<sub>2</sub><sup>+</sup>: 197.0453 [M+H]<sup>+</sup>; found: 197.0457.

## 4. Applications

### 2,4-Dimethyl-3-(2-[[[(methylsulfonyl)methyl]sulfonyl]phenyl]-3-pentanol (37)

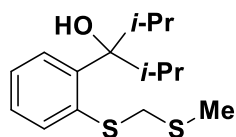

Methyl 2-[[[(methylsulfonyl)methyl]sulfonyl]benzoate (228 mg, 1.0 mmol, 1.0 equiv)) was solubilized in dry 2-MeTHF (5 mL) under Argon atmosphere and *i*-PrMgCl (1.0 mL of 2.0 M in THF, 2.0 mmol, 2.0 equiv) was added dropwise and the reaction was carried out at 0 °C for 1 hour. Subsequently it was quenched with aqueous saturated NH<sub>4</sub>Cl solution. The resulting organic phase was extracted 3 times with Et<sub>2</sub>O, washed with brine, dried over anhydrous Na<sub>2</sub>SO<sub>4</sub> and concentrated *in vacuo*. Compound **37** was obtained in 87% yield (248 mg) as colourless oil after chromatography on silica gel (90:10 v/v, *n*-hexane/ethyl acetate).

<sup>1</sup>H NMR (400 MHz, CDCl<sub>3</sub>) δ: 7.49 (m, 1H, Ph H-3), 7.25 (m, 2H, Ph H-5,6), 7.19 (m, 1H, Ph-4), 5.41 (brs, 1H, OH), 3.98 (s, 2H, SCH<sub>2</sub>S), 2.36 (brs, 2H, CH(CH<sub>3</sub>)<sub>2</sub>), 2.24 (s, 3H, SCH<sub>3</sub>), 0.91 (d, *J* = 6.7 Hz, 6H, CH(CH<sub>3</sub>)<sub>2</sub>), 0.80 (d, *J* = 6.8 Hz, 6H, CH(CH<sub>3</sub>)<sub>2</sub>).

<sup>13</sup>C NMR (100 MHz, CDCl<sub>3</sub>) δ: 143.4 (br, Ph C-1), 136.8 (br, Ph C-3), 133.1 (Ph C-2), 128.8 (Ph C-6), 127.2 (Ph C-5), 126.7 (Ph C-4), 85.0 (CHOH), 43.6 (br, SCH<sub>2</sub>S), 35.6 (br, CH(CH<sub>3</sub>)<sub>2</sub>), 18.1 (CH(CH<sub>3</sub>)<sub>2</sub>), 16.8 (CH(CH<sub>3</sub>)<sub>2</sub>), 15.8 (SCH<sub>3</sub>).

HRMS (ESI), *m/z*: calcd. for C<sub>18</sub>H<sub>25</sub>OS<sub>2</sub><sup>+</sup>: 285.1341 [M+H]<sup>+</sup>; found: 285.1338.

### 2-Methyl-1-(2-[[[(methylsulfonyl)methyl]sulfonyl]phenyl]-1-propanone (38)

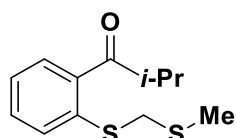

Methyl 2-[[[(methylsulfonyl)methyl]sulfonyl]benzoate (228 mg, 1.0 mmol, 1.0 equiv)) was solubilized in dry CPME (5 mL) under Argon atmosphere and *N*-methoxymethanamine hydrogen chloride (195 mg, 2.0 mmol, 2.0 equiv) was added at 0 °C. After that *i*-PrMgCl (0.9 mL of 2.0 M in THF, 1.8 mmol, 1.8 equiv) was added dropwise and the reaction was carried out at 0 °C to room temperature for 2 hours. Subsequently, additional *i*-PrMgCl (0.65 mL of 2.0 M in THF, 1.3 mmol, 1.3 equiv) was added and, the resulting mixture was allowed to react for 1 h before it was quenched with aqueous saturated NH<sub>4</sub>Cl solution. The resulting organic phase was extracted 3 times with Et<sub>2</sub>O, washed with brine, dried over anhydrous Na<sub>2</sub>SO<sub>4</sub> and concentrated *in vacuo*. Compound **38** was obtained in 85% yield (204 mg) as colourless oil after chromatography on silica gel (90:10 v/v, *n*-hexane/ethyl acetate).

<sup>1</sup>H NMR (400 MHz, CDCl<sub>3</sub>) δ: 7.62 (m, 1H, Ph H-6), 7.52 (m, 1H, Ph H-3), 7.44 (m, 1H, Ph-4), 7.26 (m, 1H, Ph H-5), 3.98 (s, 2H, SCH<sub>2</sub>S), 3.43 (sept, *J* = 6.9 Hz, 1H, CH(CH<sub>3</sub>)<sub>2</sub>), 2.22 (s, 3H, SCH<sub>3</sub>), 1.20 (d, *J* = 6.9 Hz, 6H, CH(CH<sub>3</sub>)<sub>2</sub>).

**<sup>13</sup>C NMR** (100 MHz, CDCl<sub>3</sub>) δ: 207.0 (C=O), 138.4 (Ph C-1), 137.2 (Ph C-2), 131.2 (Ph C-4), 129.2 (Ph C-3), 128.8 (Ph C-6), 125.4 (Ph C-5), 39.2 (SCH<sub>2</sub>S), 38.1 (CH(CH<sub>3</sub>)<sub>2</sub>), 18.7 (CH(CH<sub>3</sub>)<sub>2</sub>), 15.5 (SCH<sub>3</sub>).

**HRMS (ESI)**, *m/z*: calcd. for C<sub>12</sub>H<sub>17</sub>OS<sub>2</sub><sup>+</sup>: 241.0715 [M+H]<sup>+</sup>; found: 241.07119.

### 2-Methyl-1-(2-[[[(methylsulfonyl)methyl]sulfonyl]phenyl]-1-propanol (39)

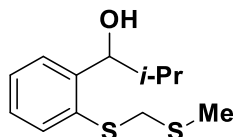

2-Methyl-1-(2-[[[(methylsulfonyl)methyl]sulfonyl]phenyl]-1-propanone (240 mg, 1.0 mmol, 1.0 equiv) was solubilized in AcOEt (5 mL) and NaBH<sub>4</sub> (76 mg, 2.0 mmol, 2.0 equiv) was added and the reaction was carried out at 0 °C for 2 hours. Subsequently it was quenched with aqueous saturated NH<sub>4</sub>Cl solution. The resulting organic phase was extracted 3 times with Et<sub>2</sub>O, washed with brine, dried over anhydrous Na<sub>2</sub>SO<sub>4</sub> and concentrated *in vacuo*. C

Compound **39** was obtained in 93% yield (225 mg) as colourless oil after chromatography on silica gel (90:10 v/v, *n*-hexane/ethyl acetate).

**<sup>1</sup>H NMR** (400 MHz, CDCl<sub>3</sub>) δ: 7.47 (m, 2H, Ph H-3,6), 7.29 (m, 1H, Ph H), 7.24 (m, 1H, Ph H), 4.96 (d, *J* = 6.9 Hz, 1H, CHOH), 3.95 (A-part of an AB-system, <sup>2</sup>*J*<sub>AB</sub> = 13.3 Hz, 1H, SCH<sub>2</sub>S), 3.92 (B-part of an AB-system, <sup>2</sup>*J*<sub>AB</sub> = 13.3 Hz, 1H, SCH<sub>2</sub>S), 2.22 (s, 3H, SCH<sub>3</sub>), 2.22 (brs, 1H, OH), 2.02 (m, 1H, CH(CH<sub>3</sub>)<sub>2</sub>), 1.02 (d, *J* = 6.6 Hz, 3H, CH(CH<sub>3</sub>)<sub>2</sub>), 0.83 (d, *J* = 6.9 Hz, 3H, CH(CH<sub>3</sub>)<sub>2</sub>).

**<sup>13</sup>C NMR** (100 MHz, CDCl<sub>3</sub>) δ: 145.5 (Ph C-1), 133.0 (Ph C-2), 131.9 (Ph C-3), 127.7 (Ph C-4), 127.6 (Ph C-5), 127.0 (Ph C-6), 76.0 (CHOH), 41.7 (SCH<sub>2</sub>S), 34.5 (CH(CH<sub>3</sub>)<sub>2</sub>), 19.4 (CH(CH<sub>3</sub>)<sub>2</sub>), 15.4 (SCH<sub>3</sub>).

**HRMS (ESI)**, *m/z*: calcd. for C<sub>12</sub>H<sub>19</sub>OS<sub>2</sub><sup>+</sup>: 243.0872 [M+H]<sup>+</sup>; found: 243.0875.

## 5. X-Ray Analysis of Compound 10, 15 and 28

The X-ray intensity data were measured on Bruker D8 Venture diffractometer equipped with multilayer monochromator, Mo K/ $\alpha$  INCOATEC micro focus sealed tube and Oxford cooling system. The structures were solved by *Direct Methods*. Non-hydrogen atoms were refined with *anisotropic displacement parameters*. Hydrogen atoms were inserted at calculated positions and refined with riding model. The following software was used: *Bruker SAINT software package*<sup>[11]</sup> using a narrow-frame algorithm for frame integration, *SADABS*<sup>[12]</sup> for absorption correction, *OLEX2*<sup>[13]</sup> for structure solution, refinement, molecular diagrams and graphical user-interface, *Shelxle*<sup>[14]</sup> for refinement and graphical user-interface *SHELXS-2015*<sup>[15]</sup> for structure solution, *SHELXL-2015*<sup>[15]</sup> for refinement, *Platon*<sup>[16]</sup> for symmetry check. Experimental data and CCDC-Codes Experimental data (Available online: <http://www.ccdc.cam.ac.uk/conts/retrieving.html>) can be found in Table 1. Crystal data, data collection parameters, and structure refinement details are given in Tables 2 to 9. Asymmetric Unit visualized in Figures 1 to 4. Samples for X-ray analysis were recrystallized from ethanol.

**Table 1** Experimental parameter and CCDC-Code.

| Sample    | Machine | Source | Temp. | Detector Distance | Time/Frame | #Frames | Frame width | CCDC    |
|-----------|---------|--------|-------|-------------------|------------|---------|-------------|---------|
|           | Bruker  |        | [K]   | [mm]              | [s]        |         | [°]         |         |
| <b>10</b> | D8      | Mo     | 100   | 30                | 8          | 1050    | 0.300       | 2016505 |
| <b>15</b> | D8      | Mo     | 100   | 30                | 60         | 1853    | 0.300       | 2016506 |
| <b>28</b> | D8      | Mo     | 100   | 30                | 15         | 1864    | 0.300       | 2016507 |

## 2-[[Phenylsulfanyl)methyl]sulfanyl]naphthalene

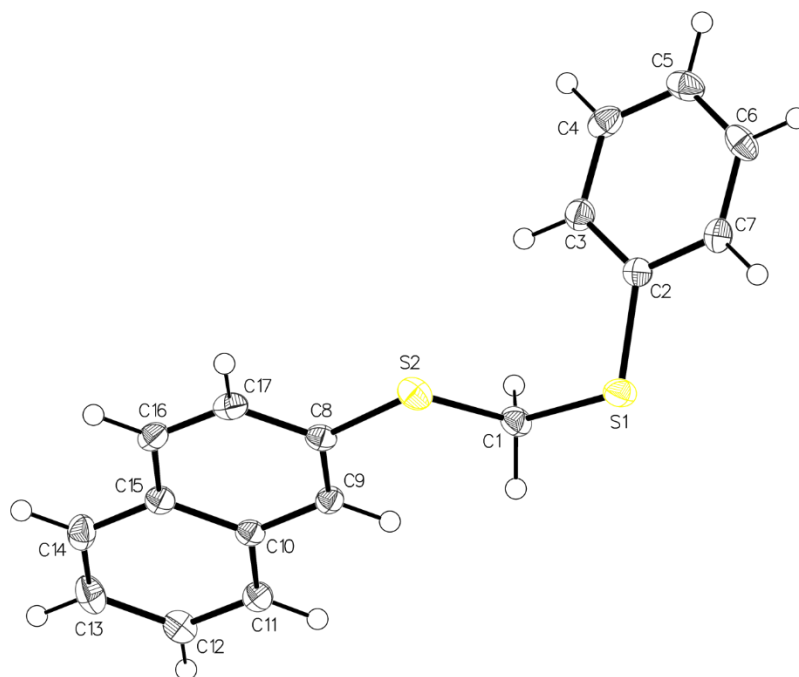

**Figure 1** Crystal structure, drawn with 50% displacement ellipsoid. The bond precision for C-C single bonds is 0.0030Å.

**Table 2** Sample and crystal data. [10]

|                                 |                                                |                          |             |                                            |                 |
|---------------------------------|------------------------------------------------|--------------------------|-------------|--------------------------------------------|-----------------|
| Radiation [Å]                   | MoK $\alpha$ ( $\lambda = 0.71073$ )           | Z                        | 4           | Measurement method                         | \f and \w scans |
| Crystal habit                   | clear colourless stick                         | a [Å]                    | 14.9903(9)  |                                            |                 |
| Crystal size [mm <sup>3</sup> ] | 0.1 × 0.05 × 0.02                              | b [Å]                    | 5.9477(4)   | Abs. correction type                       | multiscan       |
| Empirical formula               | C <sub>17</sub> H <sub>14</sub> S <sub>2</sub> | c [Å]                    | 16.5251(15) | Abs. correction Tmin                       | 0.6474          |
| Formula weight [g/mol]          | 282.40                                         | $\alpha$ [°]             | 90          | Abs. correction Tmax                       | 0.7460          |
| Temperature [K]                 | 100.0                                          | $\beta$ [°]              | 110.467(4)  | Density (calculated) [g/cm <sup>3</sup> ]  | 1.359           |
| Crystal system                  | monoclinic                                     | $\gamma$ [°]             | 90          | Absorption coefficient [mm <sup>-1</sup> ] | 0.368           |
| Space group                     | P2 <sub>1</sub> /c                             | Volume [Å <sup>3</sup> ] | 1380.33(18) | F (000) [e]                                | 592.0           |

**Table 3** Data collection and structure refinement. [10]

|                                          |                 |                 |                              |                                                       |                            |
|------------------------------------------|-----------------|-----------------|------------------------------|-------------------------------------------------------|----------------------------|
| 2 $\theta$ range for data collection [°] | 5.042 to 50.696 | Index ranges    |                              | Goodness-of-fit on F <sup>2</sup>                     | 1.052                      |
| Reflections collected                    | 12148           | h               | -18 ≤ h ≤ 17                 | Diff. peak and hole [e <sup>-</sup> Å <sup>-3</sup> ] | 0.24/-0.26                 |
| Data / restraints / parameters           | 2513/0/0172     | k               | -6 ≤ k ≤ 7                   |                                                       |                            |
| Refinement method                        | Direct Methods  | l               | -19 ≤ l ≤ 19                 | Function minimized                                    | $\sum w (F_o^2 - F_c^2)^2$ |
|                                          |                 | all data        | R1 = 0.0414,<br>wR2 = 0.0776 | Weighting scheme                                      | where                      |
|                                          |                 | >2 $\sigma$ (I) | R1 = 0.0324,<br>wR2 = 0.0722 | $w=1/[\sigma^2(F_o^2) + (0.0257P)^2 + 0.8649P]$       | $P=(F_o^2+2F_c^2)/3$       |



## 2-[[Phenylsulfanyl)methyl]sulfanyl]-1,3-benzoxazole

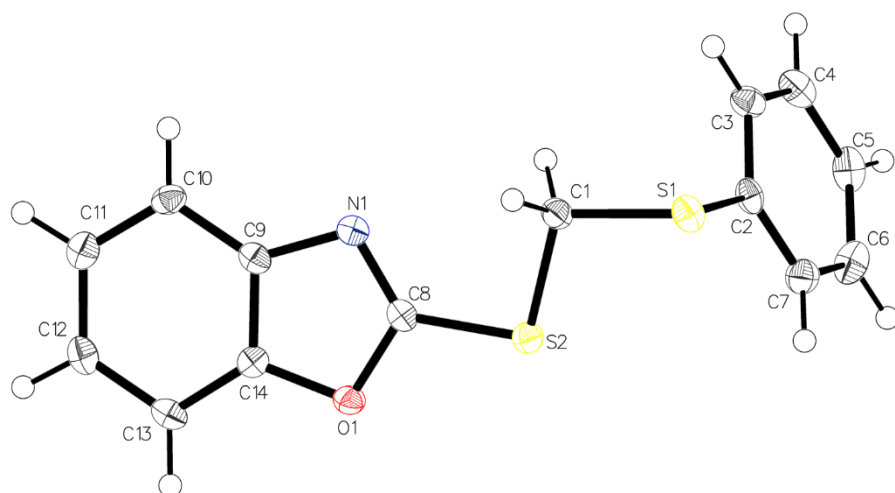

**Figure 2** Crystal structure, drawn with 50% displacement ellipsoid. The bond precision for C-C single bonds is 0.0038Å.

**Table 4** Sample and crystal data. [15]

|                                 |                                                  |                          |             |                                            |                 |
|---------------------------------|--------------------------------------------------|--------------------------|-------------|--------------------------------------------|-----------------|
| Radiation [Å]                   | MoK $\alpha$ ( $\lambda = 0.71073$ )             | Z                        | 2           | Measurement method                         | \f and \w scans |
| Crystal habit                   | clear colourless block                           | a [Å]                    | 9.5155(11)  |                                            |                 |
| Crystal size [mm <sup>3</sup> ] | 0.045 $\times$ 0.04 $\times$ 0.03                | b [Å]                    | 4.8412(4)   | Abs. correction type                       | multiscan       |
| Empirical formula               | C <sub>14</sub> H <sub>11</sub> NOS <sub>2</sub> | c [Å]                    | 13.9736(18) | Abs. correction Tmin                       | 0.7062          |
| Formula weight [g/mol]          | 273.36                                           | $\alpha$ [°]             | 90          | Abs. correction Tmax                       | 0.7460          |
| Temperature [K]                 | 100.0                                            | $\beta$ [°]              | 96.436(5)   | Density (calculated) [g/cm <sup>3</sup> ]  | 1.419           |
| Crystal system                  | monoclinic                                       | $\gamma$ [°]             | 90          | Absorption coefficient [mm <sup>-1</sup> ] | 0.401           |
| Space group                     | P21                                              | Volume [Å <sup>3</sup> ] | 639.66(12)  | F (000) [e <sup>-</sup> ]                  | 284.0           |

**Table 5** Data collection and structure refinement. [15]

|                                          |                 |                  |                              |                                                       |                              |
|------------------------------------------|-----------------|------------------|------------------------------|-------------------------------------------------------|------------------------------|
| 2 $\theta$ range for data collection [°] | 4.932 to 60.168 | Index ranges     |                              | Goodness-of-fit on F <sup>2</sup>                     | 1.148                        |
| Reflections collected                    | 15673           | h                | -13 $\leq$ h $\leq$ 13       | Diff. peak and hole [e <sup>-</sup> Å <sup>-3</sup> ] | 0.30/-0.28                   |
| Data / restraints / parameters           | 3715/1/163      | k                | -6 $\leq$ k $\leq$ 6         |                                                       |                              |
| Refinement method                        | Direct Methods  | l                | -19 $\leq$ l $\leq$ 19       | Function minimized                                    | $\Sigma w (F_o^2 - F_c^2)^2$ |
|                                          |                 | all data         | R1 = 0.0423,<br>wR2 = 0.0680 | Weighting scheme                                      | where                        |
|                                          |                 | $l > 2\sigma(l)$ | R1 = 0.0303,<br>wR2 = 0.0555 | $w = 1 / [\sigma^2(F_o^2) + (0.0109P)^2 + 0.3131P]$   | $P = (F_o^2 + 2F_c^2) / 3$   |

1,1',1''-(((Methylsulfonyl)methyl)sulfonyl)methanetriyl)tribenzene

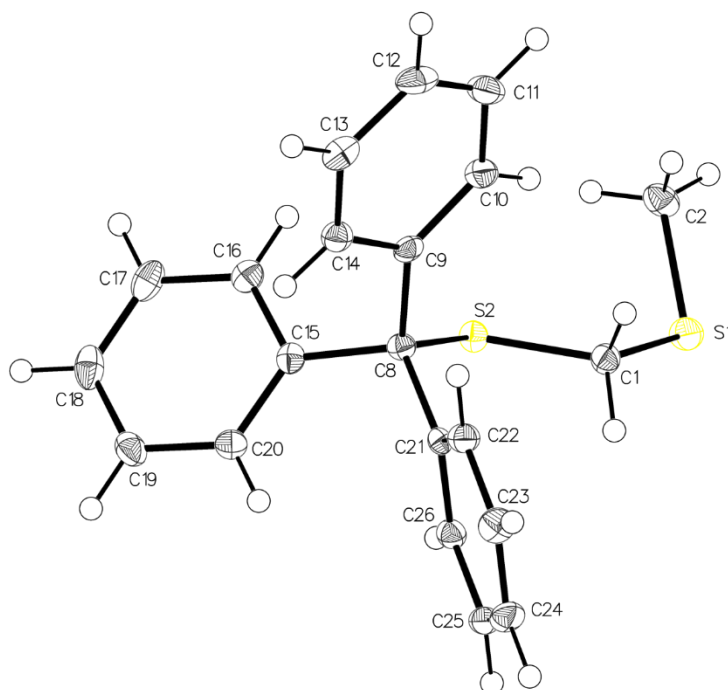

Figure 3 Crystal structure, drawn with 50% displacement ellipsoid. The bond precision for C-C single bonds is 0.0022Å.

Table 6 Sample and crystal data. [28]

|                                 |                                                |                          |              |                                            |                 |
|---------------------------------|------------------------------------------------|--------------------------|--------------|--------------------------------------------|-----------------|
| Radiation [Å]                   | MoK $\alpha$ ( $\lambda = 0.71073$ )           | Z                        | 4            | Measurement method                         | \f and \w scans |
| Crystal habit                   | clear colourless block                         | a [Å]                    | 16.4219(5)   |                                            |                 |
| Crystal size [mm <sup>3</sup> ] | 0.1 $\times$ 0.05 $\times$ 0.03                | b [Å]                    | 7.1899(2)    | Abs. correction type                       | multiscan       |
| Empirical formula               | C <sub>21</sub> H <sub>20</sub> S <sub>2</sub> | c [Å]                    | 16.4782(7)   | Abs. correction Tmin                       | 0.6709          |
| Formula weight [g/mol]          | 336.49                                         | $\alpha$ [°]             | 90           | Abs. correction Tmax                       | 0.7460          |
| Temperature [K]                 | 100.0                                          | $\beta$ [°]              | 118.3742(10) | Density (calculated) [g/cm <sup>3</sup> ]  | 1.306           |
| Crystal system                  | monoclinic                                     | $\gamma$ [°]             | 90           | Absorption coefficient [mm <sup>-1</sup> ] | 0.308           |
| Space group                     | P2 <sub>1</sub> /n                             | Volume [Å <sup>3</sup> ] | 1711.87(10)  | F (000) [e <sup>-</sup> ]                  | 712.0           |

Table 7 Data collection and structure refinement. [28]

|                                          |                |                  |                              |                                                       |                            |
|------------------------------------------|----------------|------------------|------------------------------|-------------------------------------------------------|----------------------------|
| 2 $\theta$ range for data collection [°] | 4.834 to 50.7  | Index ranges     |                              | Goodness-of-fit on F <sup>2</sup>                     | 1.069                      |
| Reflections collected                    | 32414          | h                | -19 $\leq$ h $\leq$ 19       | Diff. peak and hole [e <sup>-</sup> Å <sup>-3</sup> ] | 0.29/-0.25                 |
| Data / restraints / parameters           | 3136/0/209     | k                | -8 $\leq$ k $\leq$ 8         |                                                       |                            |
| Refinement method                        | Direct Methods | l                | -19 $\leq$ l $\leq$ 19       | Function minimized                                    | $\sum w (F_o^2 - F_c^2)^2$ |
|                                          |                | all data         | R1 = 0.0335,<br>wR2 = 0.0732 | Weighting scheme                                      | where                      |
|                                          |                | $I > 2\sigma(I)$ | R1 = 0.0287,<br>wR2 = 0.0702 | $w = 1 / [\sigma^2(F_o^2) + (0.0270P)^2 + 1.2512P]$   | $P = (F_o^2 + 2F_c^2) / 3$ |

**Table 8** The main characteristic of the common backbone (C2-S1-C1-S2-C8) is the difference in the two C-S bonds. All three compounds show smaller values on C1-S1.

|           | <b>C1-S1</b> | <b>C1-S2</b> | <b>S1-S2</b> | <b>S2-C1-S1</b> | <b>C2-S1</b> | <b>C8-S2</b> |
|-----------|--------------|--------------|--------------|-----------------|--------------|--------------|
| <b>10</b> | 1.795 Å      | 1.814 Å      | 2.943 Å      | 109.249         | 1.774 Å      | 1.766 Å      |
| <b>15</b> | 1.801 Å      | 1.819 Å      | 2.932 Å      | 108.179         | 1.782 Å      | 1.735 Å      |
| <b>28</b> | 1.804 Å      | 1.816 Å      | 2.945 Å      | 105.846         | 1.803 Å      | 1.863 Å      |

## 6. References

- [1] M. Musiejuk, J. Doroszuk, B. Jędrzejewski, G. Ortiz Nieto, M. Marin Navarro, D. Witt, *Adv. Synth. Catal.* **2020**, *362*, 618-626.
- [2] J. Suffert, *J. Org. Chem.* **1989**, *54*, 509-510.
- [3] K. Kobayashi, M. Kawakita, H. Akamatsu, O. Morikawa, H. Konishi, *B Chem Soc Jpn* **1996**, *69*, 2645-2647.
- [4] Z. G. Guo, B. Zhang, X. H. Wei, C. J. Xi, *Org Lett* **2018**, *20*, 6678-6681.
- [5] C. Silva-Cuevas, E. Paleo, D. F. Leon-Raygo, J. A. Lujan-Montelongo, *Rsc Adv* **2018**, *8*, 24654-24659.
- [6] V. Pace, A. Pelosi, D. Antermite, O. Rosati, M. Curini, W. Holzer, *Chem Commun* **2016**, *52*, 2639-2642.
- [7] J. L. Wardell, D. W. Grant, *J Organomet Chem* **1980**, *198*, 121-129.
- [8] P. G. Gassman, T. Miura, *Tetrahedron Lett* **1981**, *22*, 4787-4790.
- [9] J. H. Zaidi, F. Naeem, K. M. Khan, R. Iqbal, Z. Ullah, *Synthetic Commun* **2004**, *34*, 2641-2653.
- [10] C. Huynh, V. Ratovelomanana, S. Julia, *B Soc Chim Fr li-Ch* **1977**, 710-716.
- [11] Bruker SAINT v8.38B Copyright © 2005-2019 Bruker AXS.
- [12] G. M. Sheldrick, **1996**, SHELXS. University of Göttingen, Germany.
- [13] O. V. Dolomanov, L. J. Bourhis, R. J. Gildea, J. A. K. Howard, H. Puschmann, *Journal of Applied Crystallography* **2009**, *42*, 339-341.
- [14] C. B. Hübschle, G. M. Sheldrick, B. Dittrich, *Journal of Applied Crystallography* **2011**, *44*, 1281-1284.
- [15] G. M. Sheldrick, *Acta Cryst.* **2015**, *C71*, 3-8.
- [16] A. Spek, *Acta Cryst. D* **2009**, *65*, 148-155.

## 7. Copies of $^1\text{H}$ - and $^{13}\text{C}$ -NMR Spectra for all the compounds

### 1-[(Benzylsulfanyl)methyl]-4-bromobenzene (2)

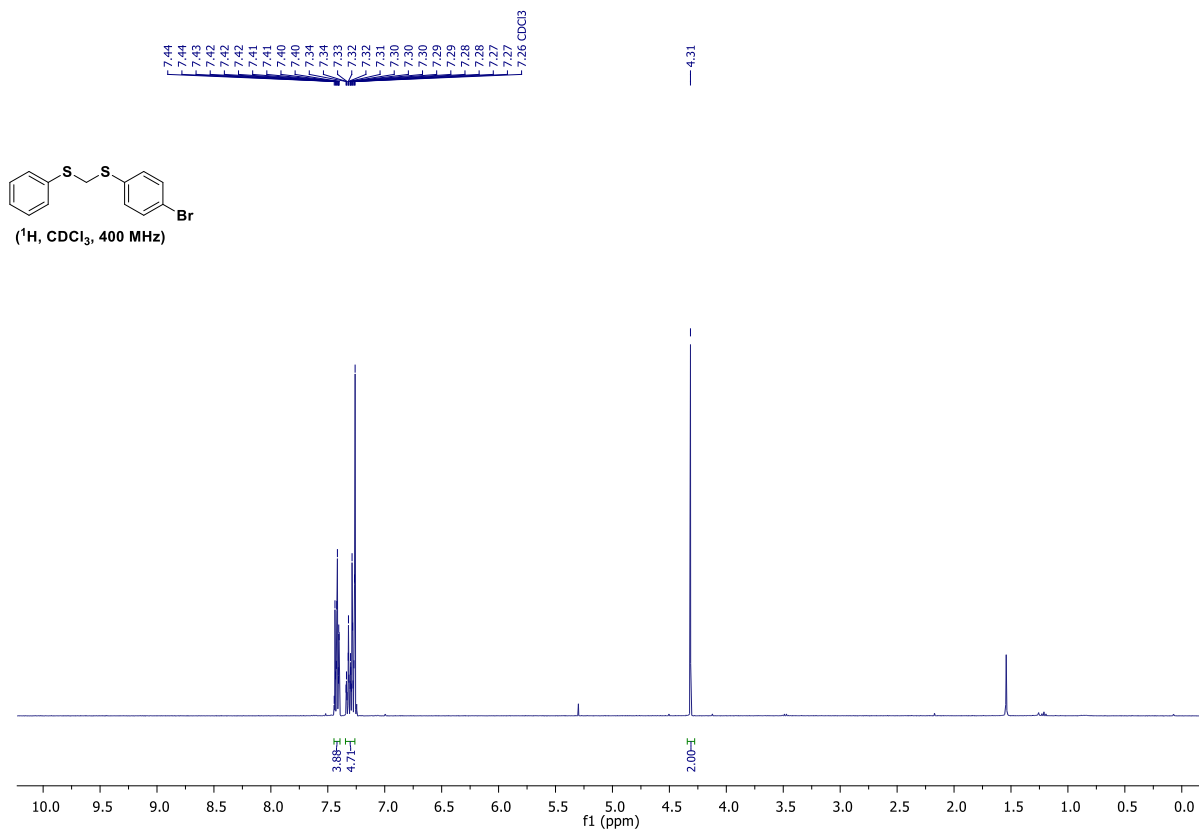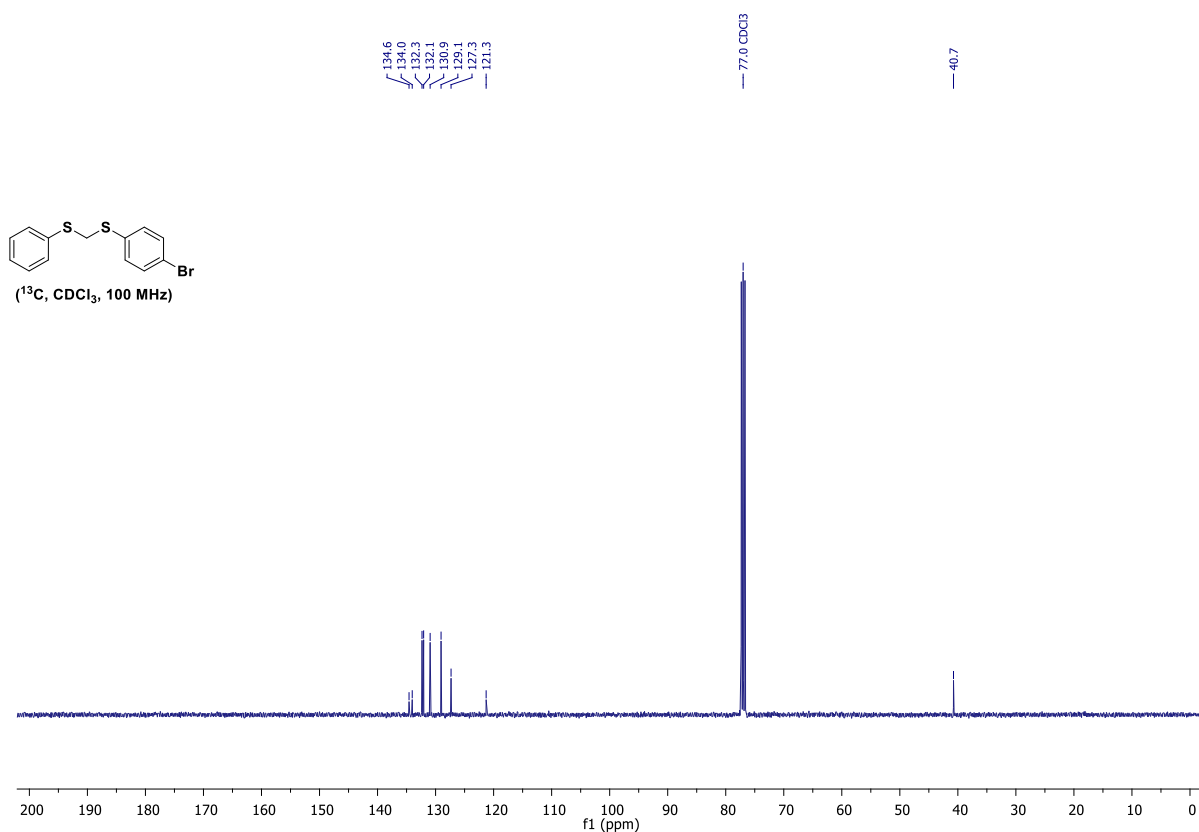

# 1-Chloro-4-[[[(phenylsulfanyl)methyl]sulfanyl]benzene (3)

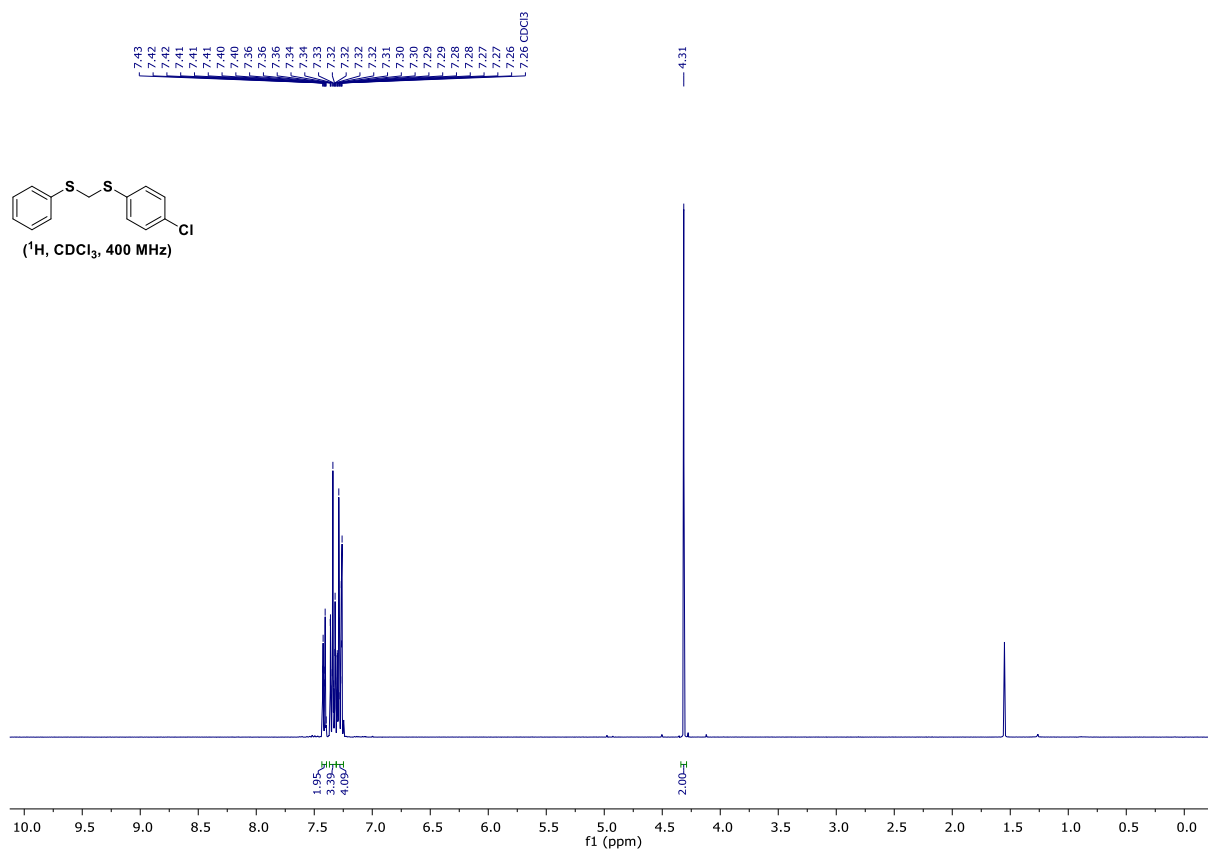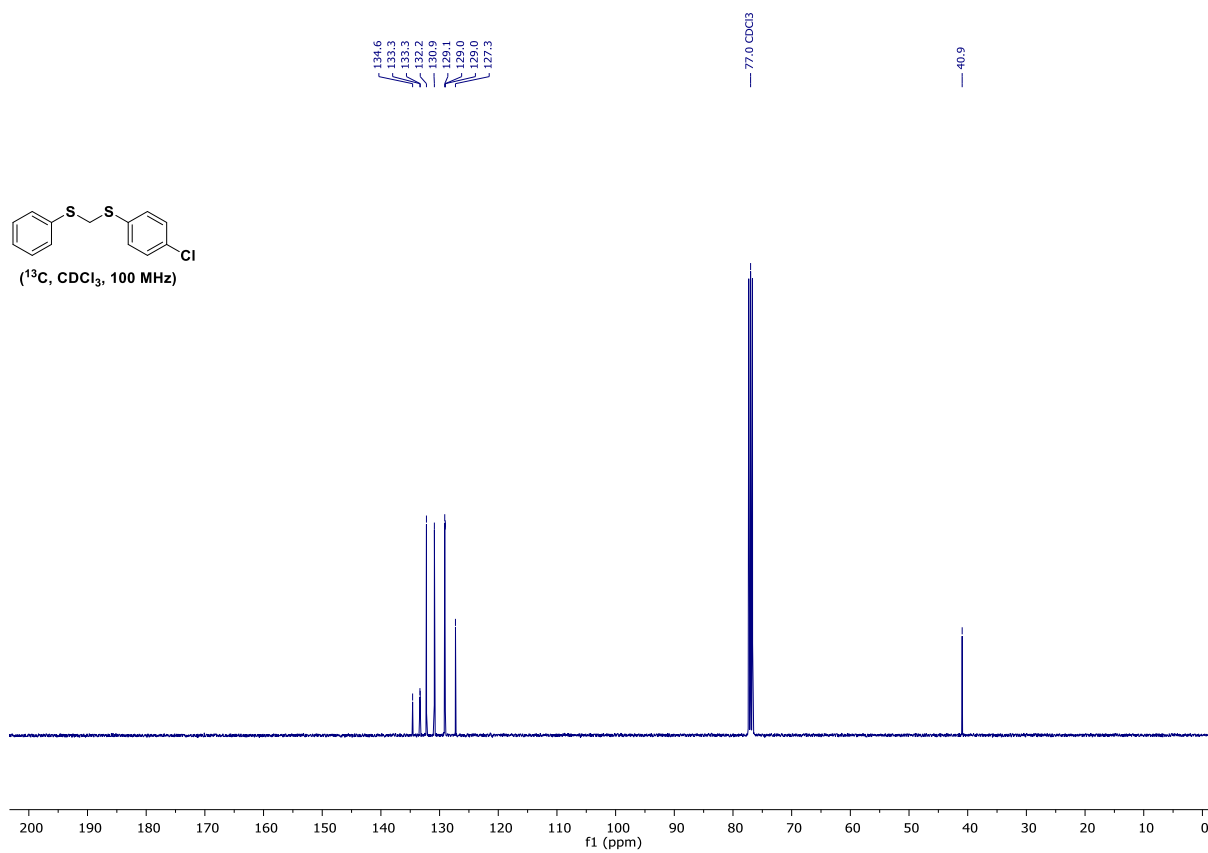

# 1,3-Dichloro-2-[[[(phenylsulfanyl)methyl]sulfonyl]benzene (4)

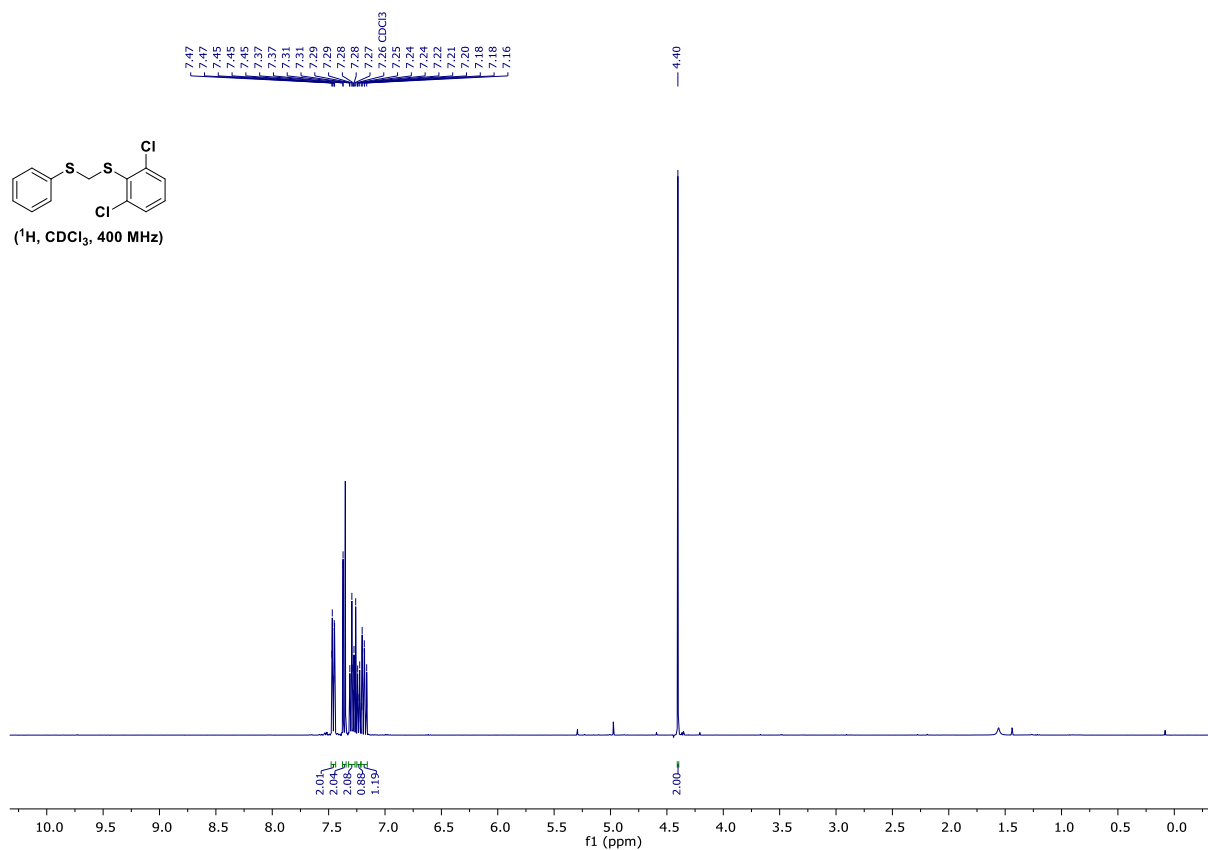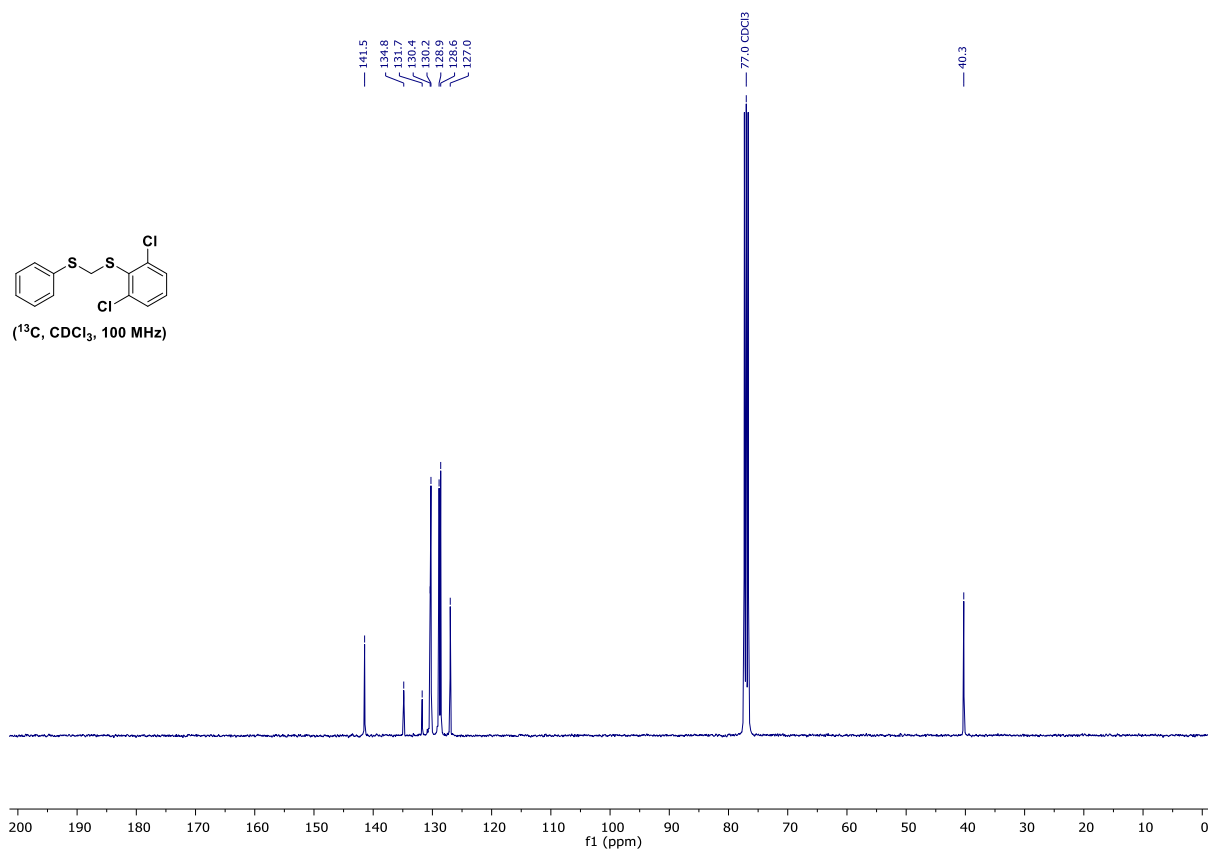

# 1-Fluoro-4-(((phenylsulfanyl)methyl)sulfanyl)benzene (5)

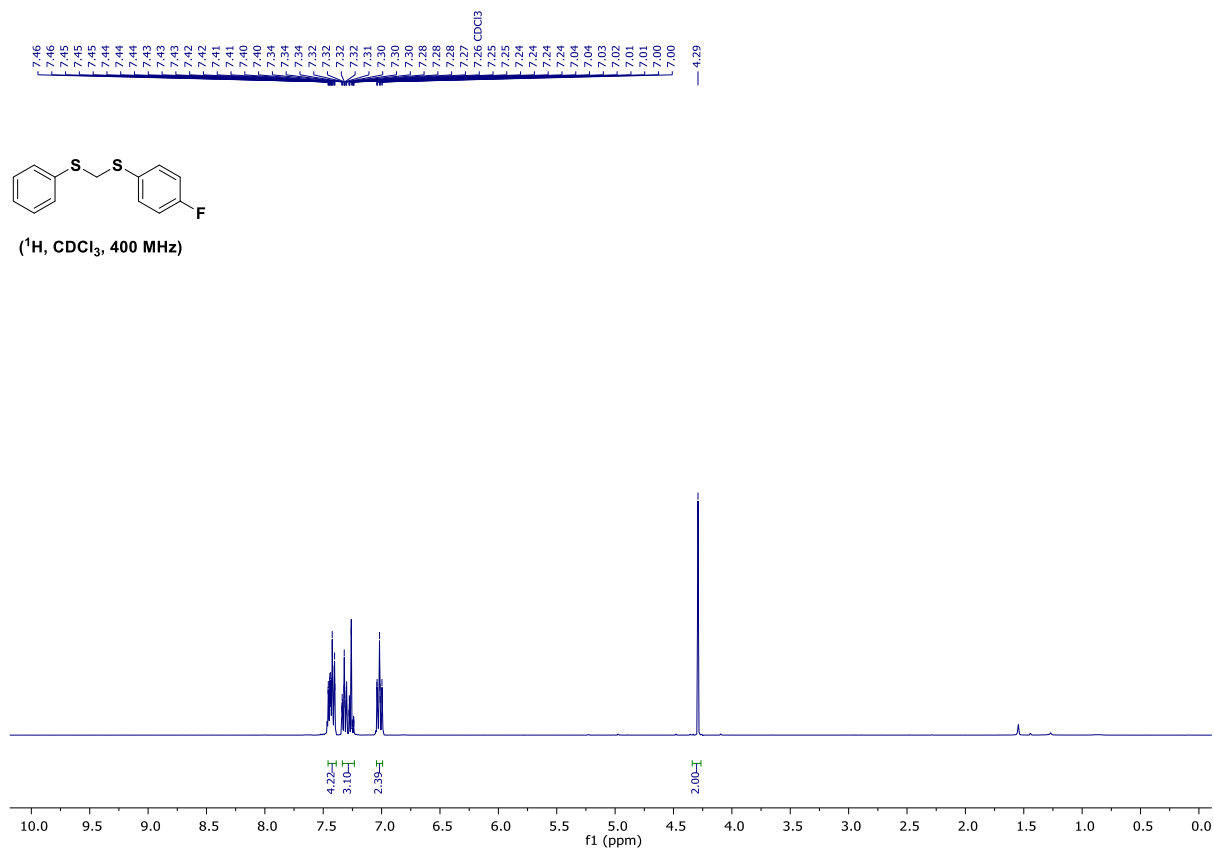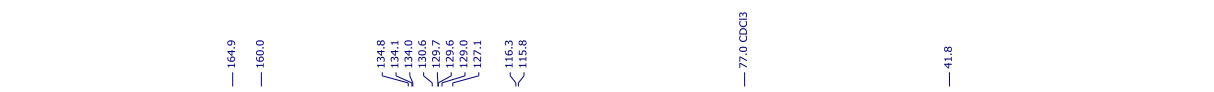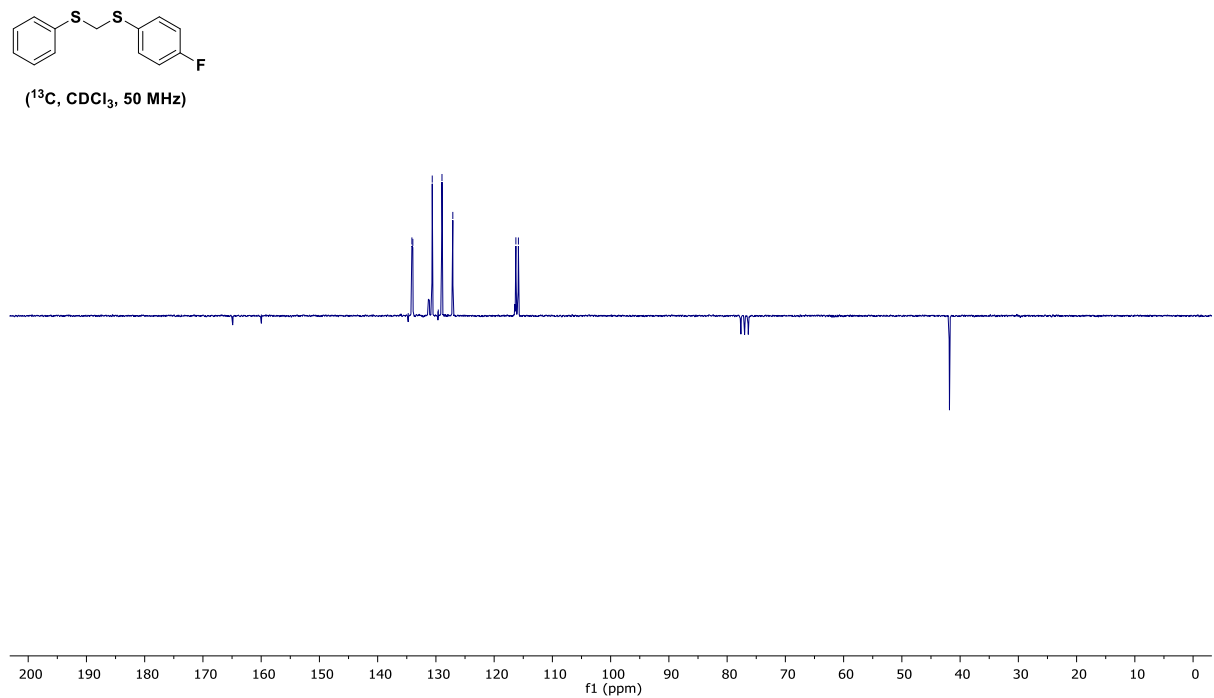



# 1-[[Phenylsulfanyl)methyl]sulfanyl]-2-(trifluoromethyl)benzene (6)

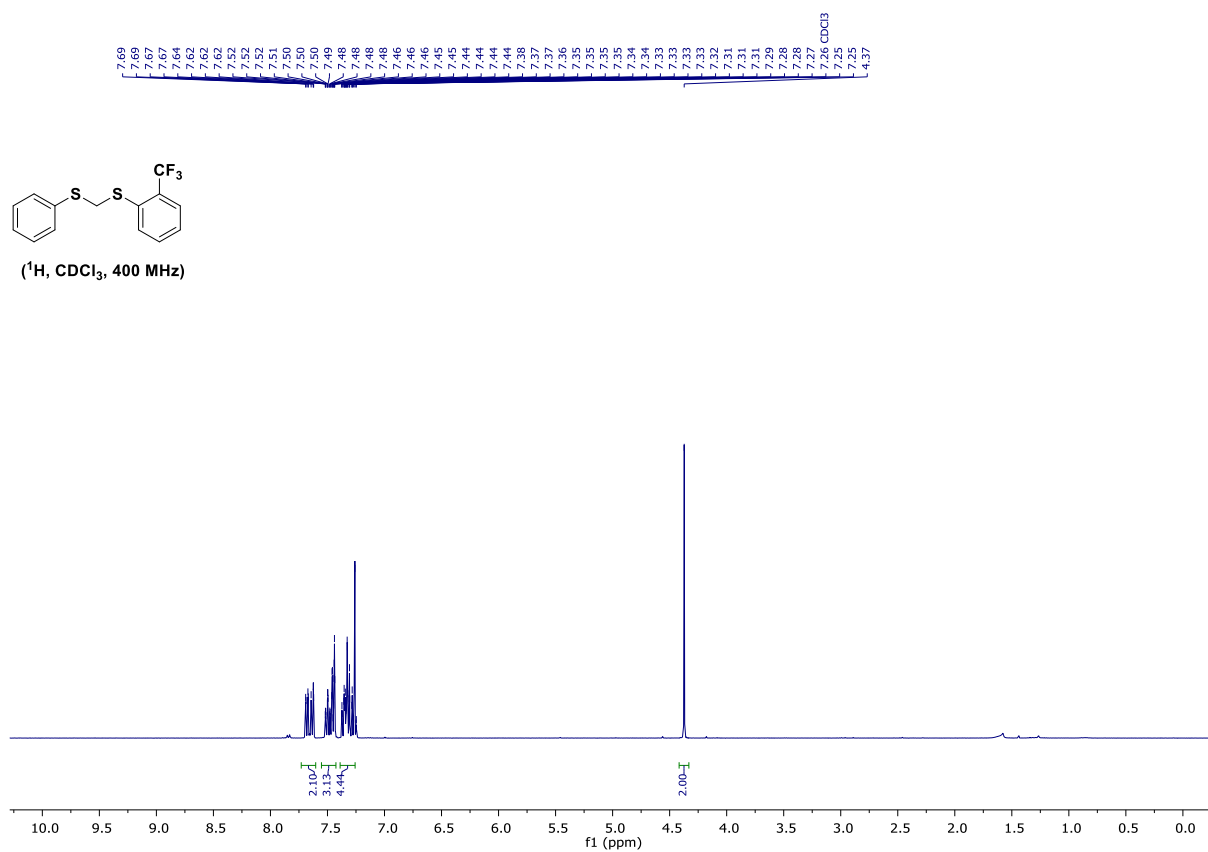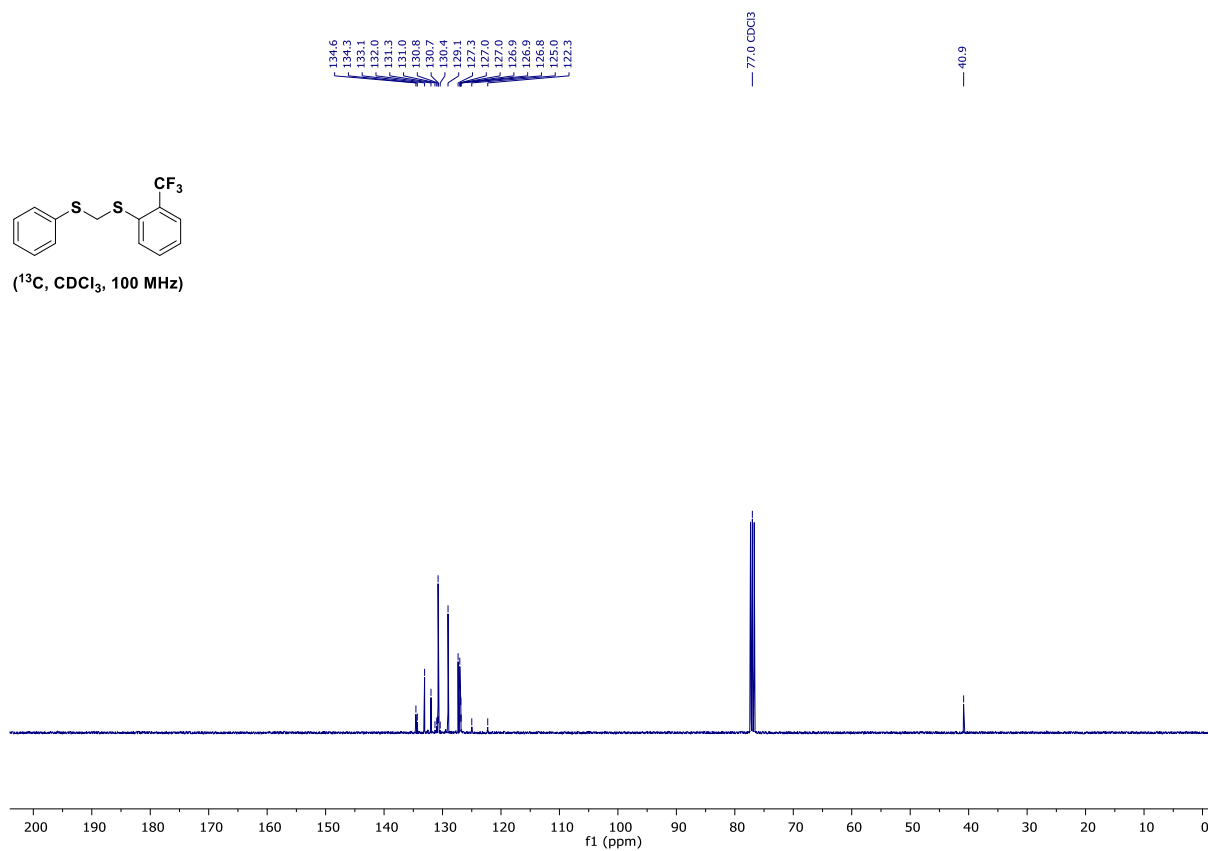

# 1-Nitro-4-[[[(phenylsulfanyl)methyl]sulfonyl]benzene (7)

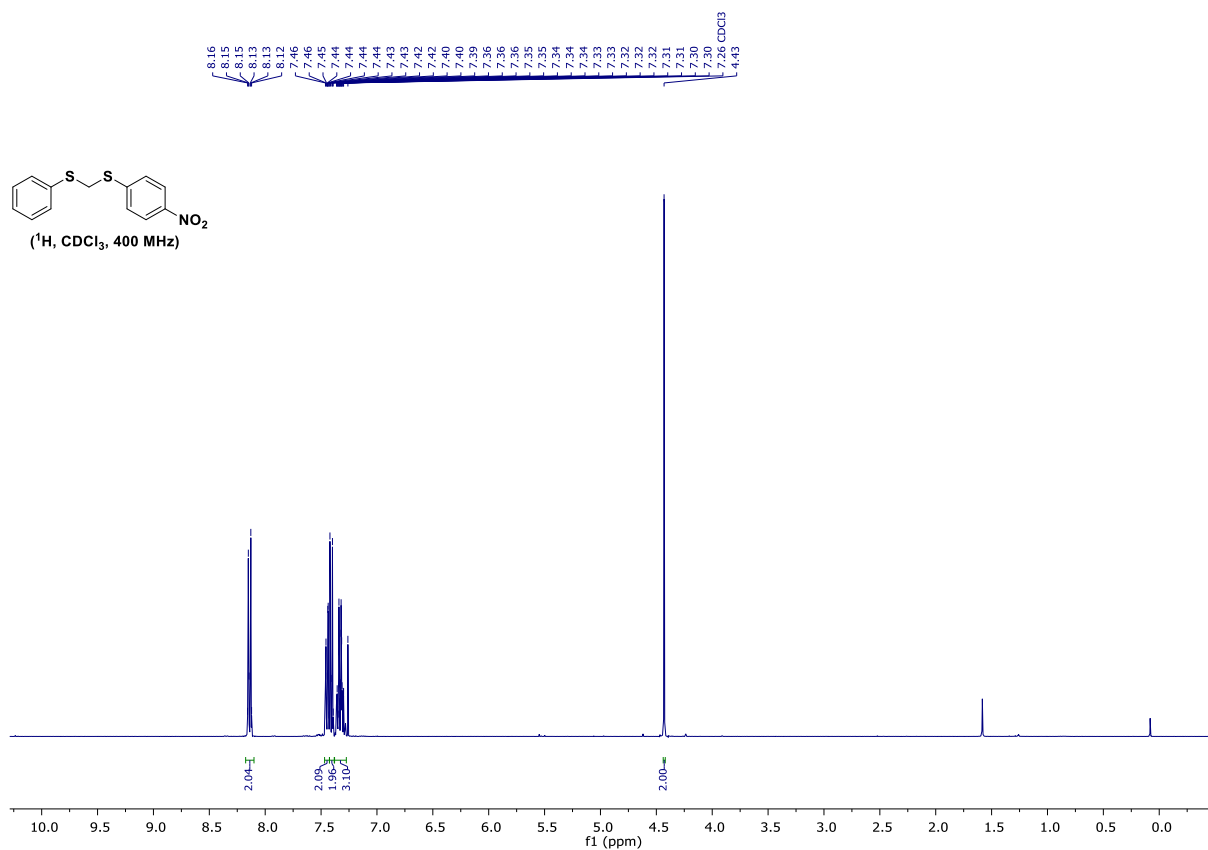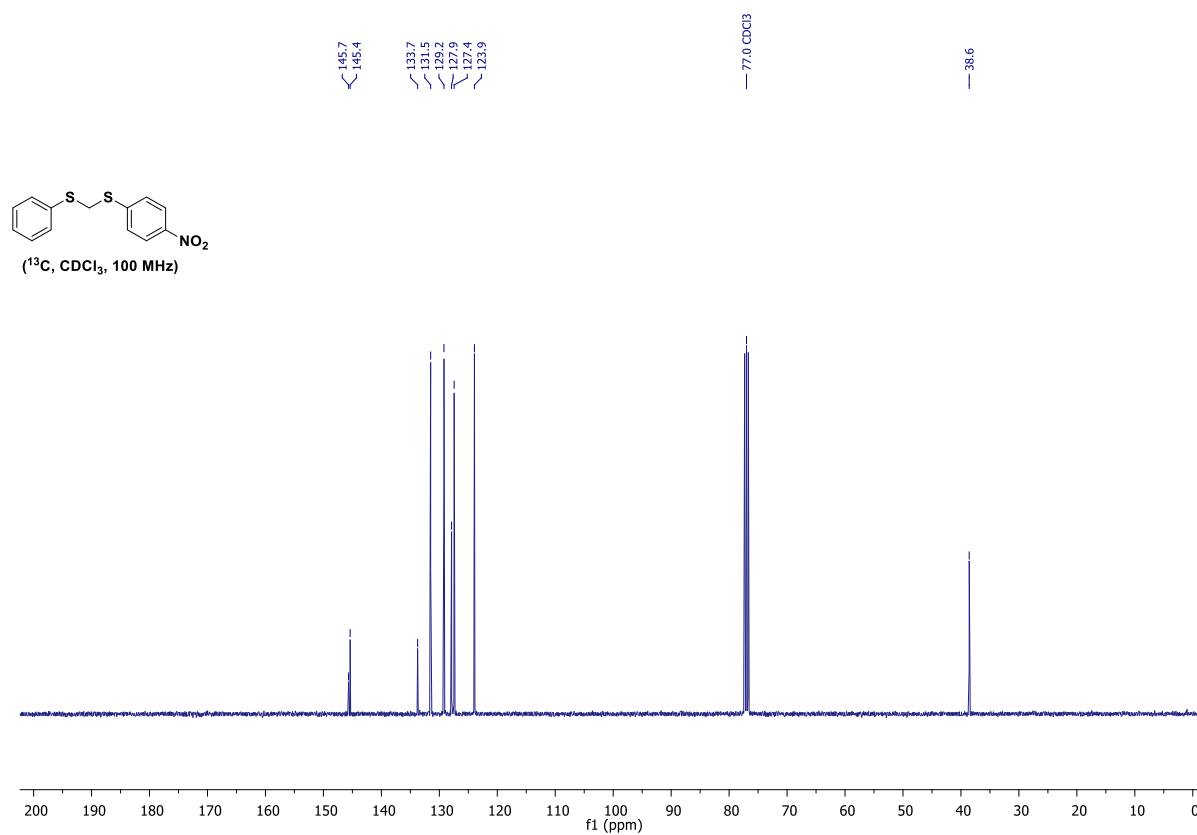

# 4-[[Phenylsulfanyl)methyl]sulfanyl]aniline (8)

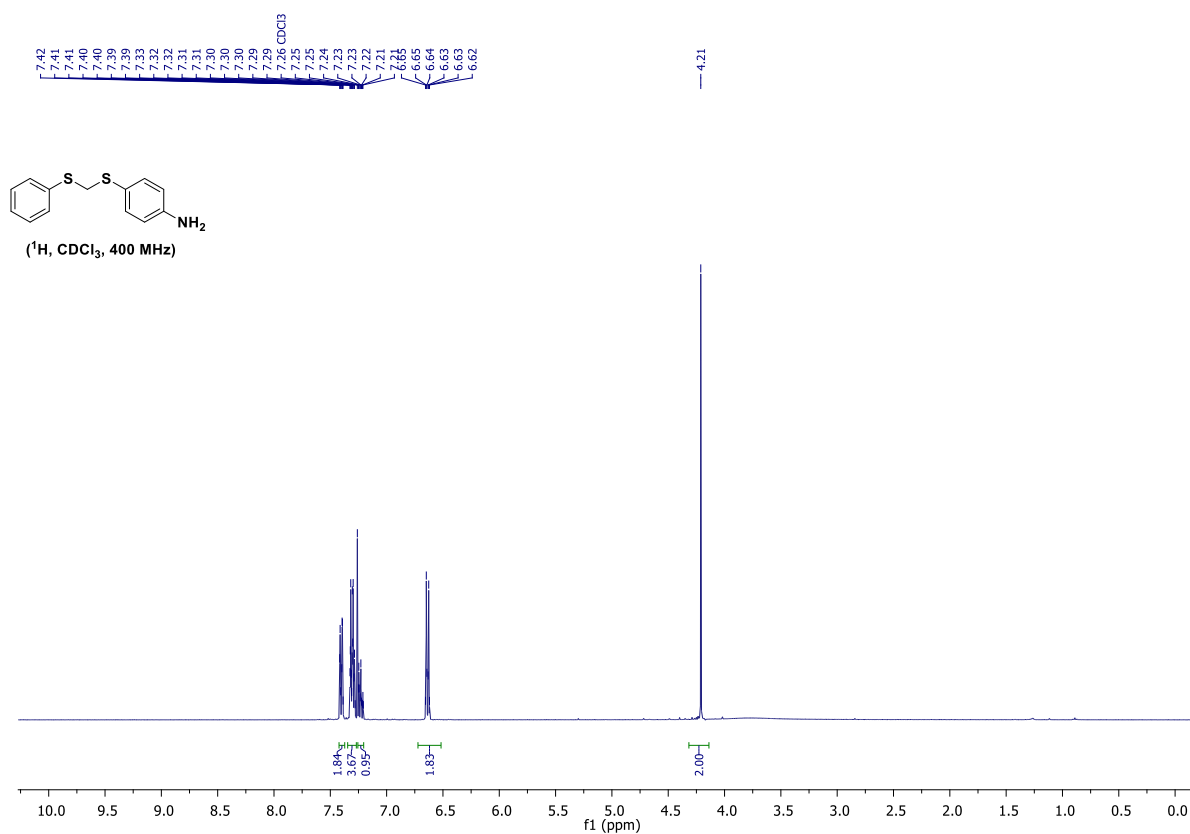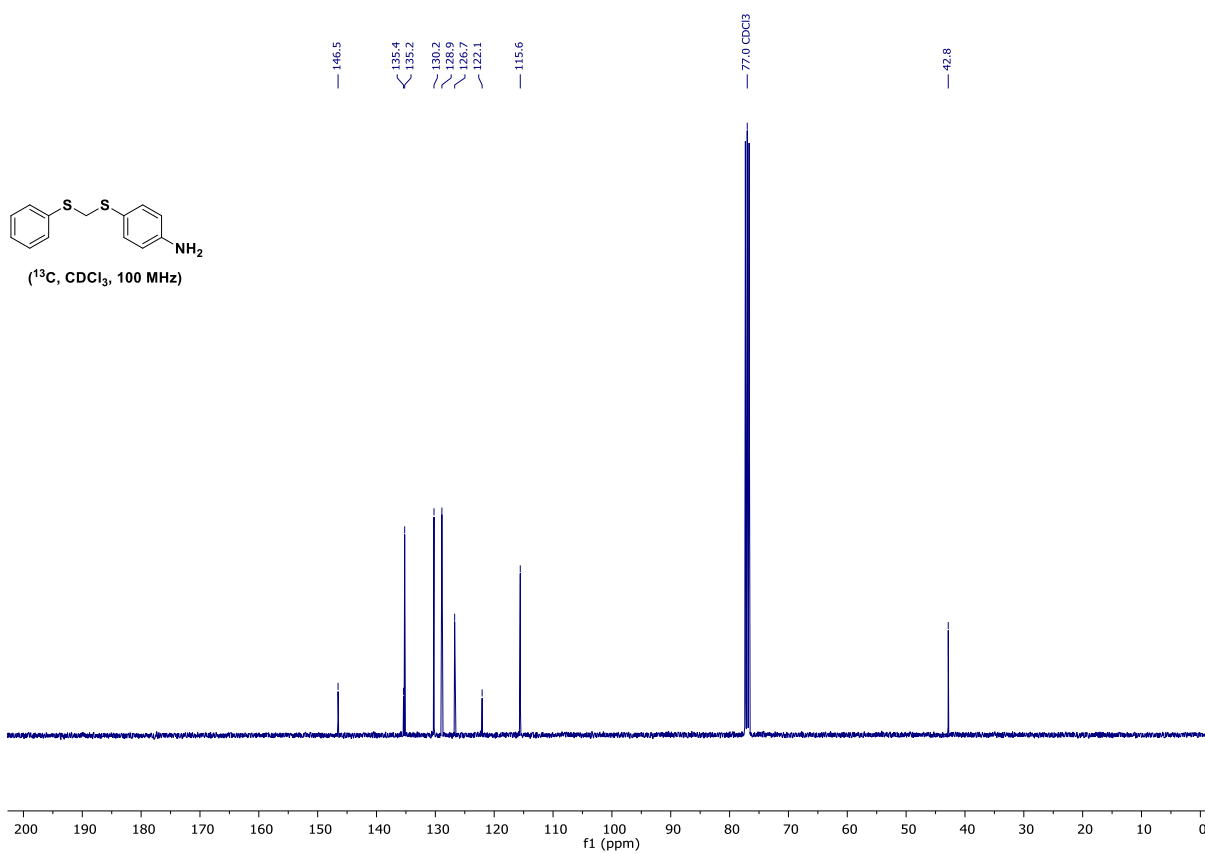

# 1,1'-(Methylenedisulfanyldiyl)dibenzene (9)

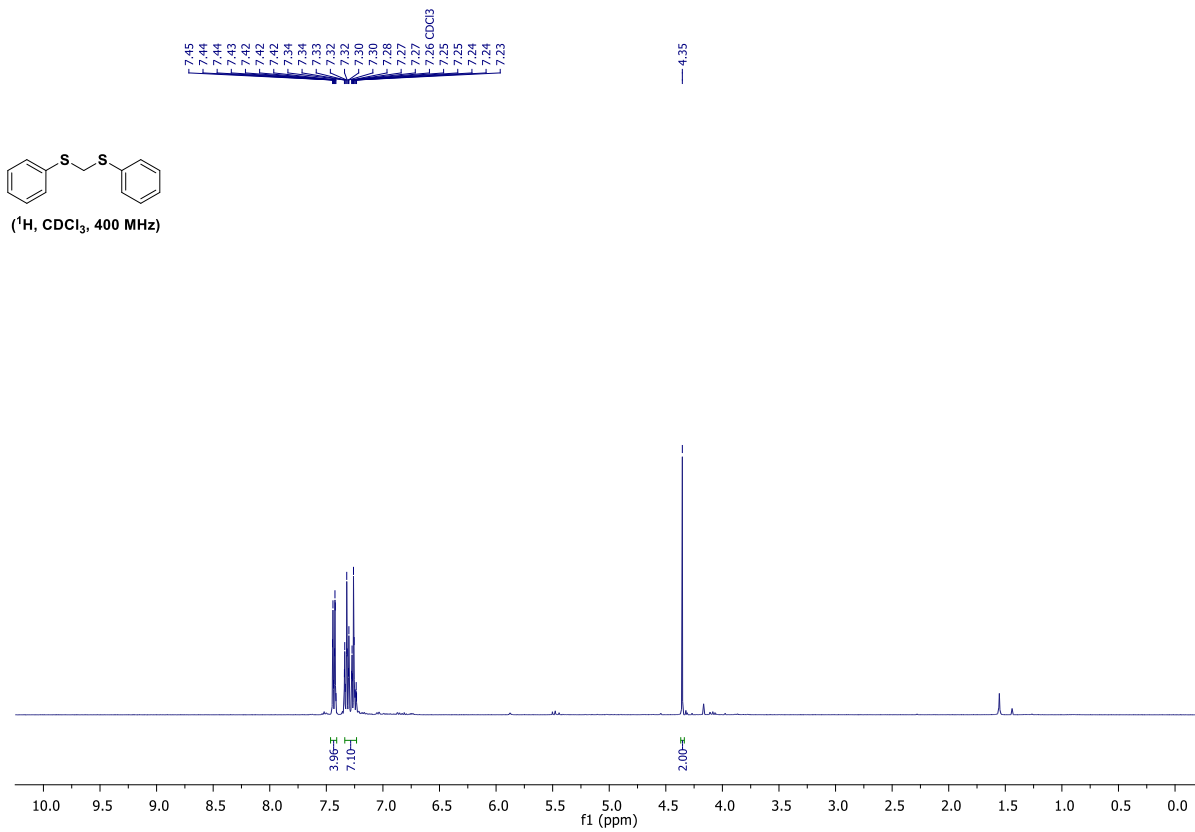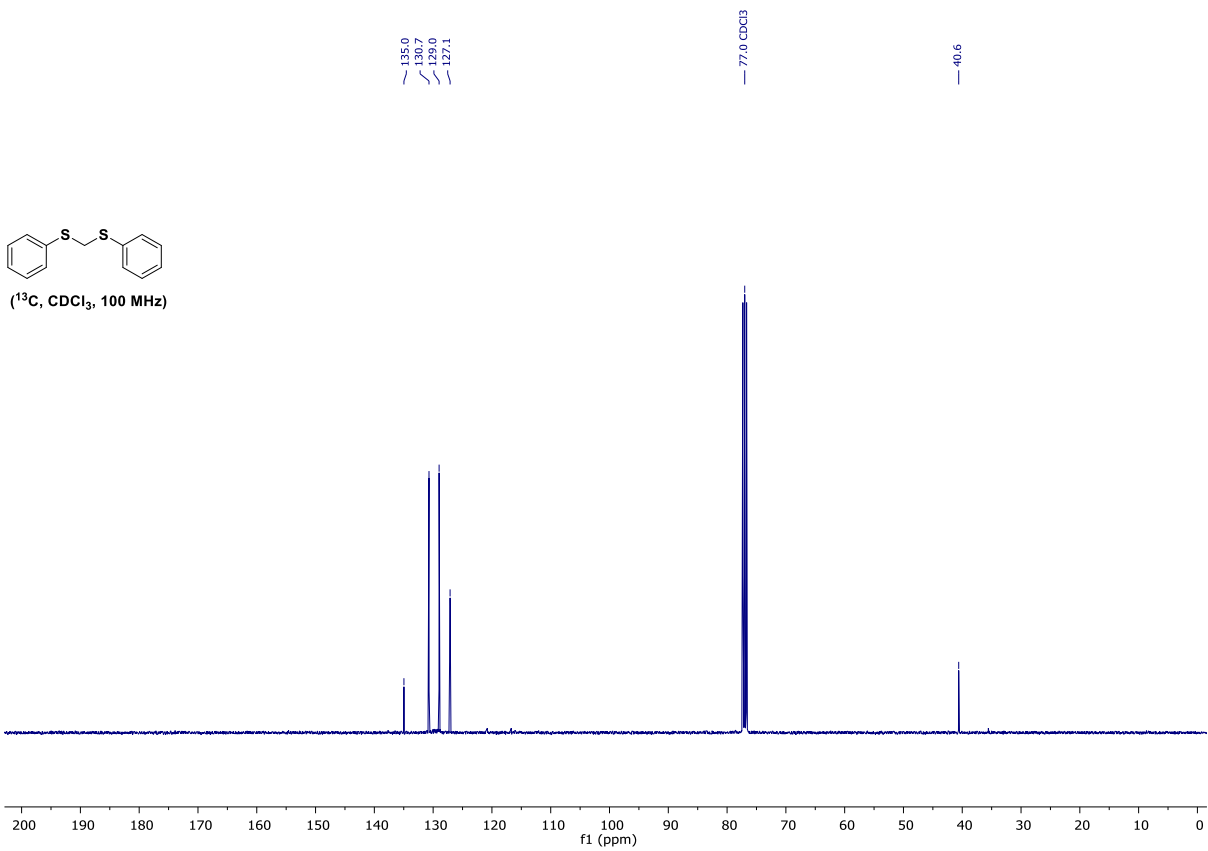

## 2-[[Phenylsulfanyl)methyl]sulfanyl]naphthalene (10)

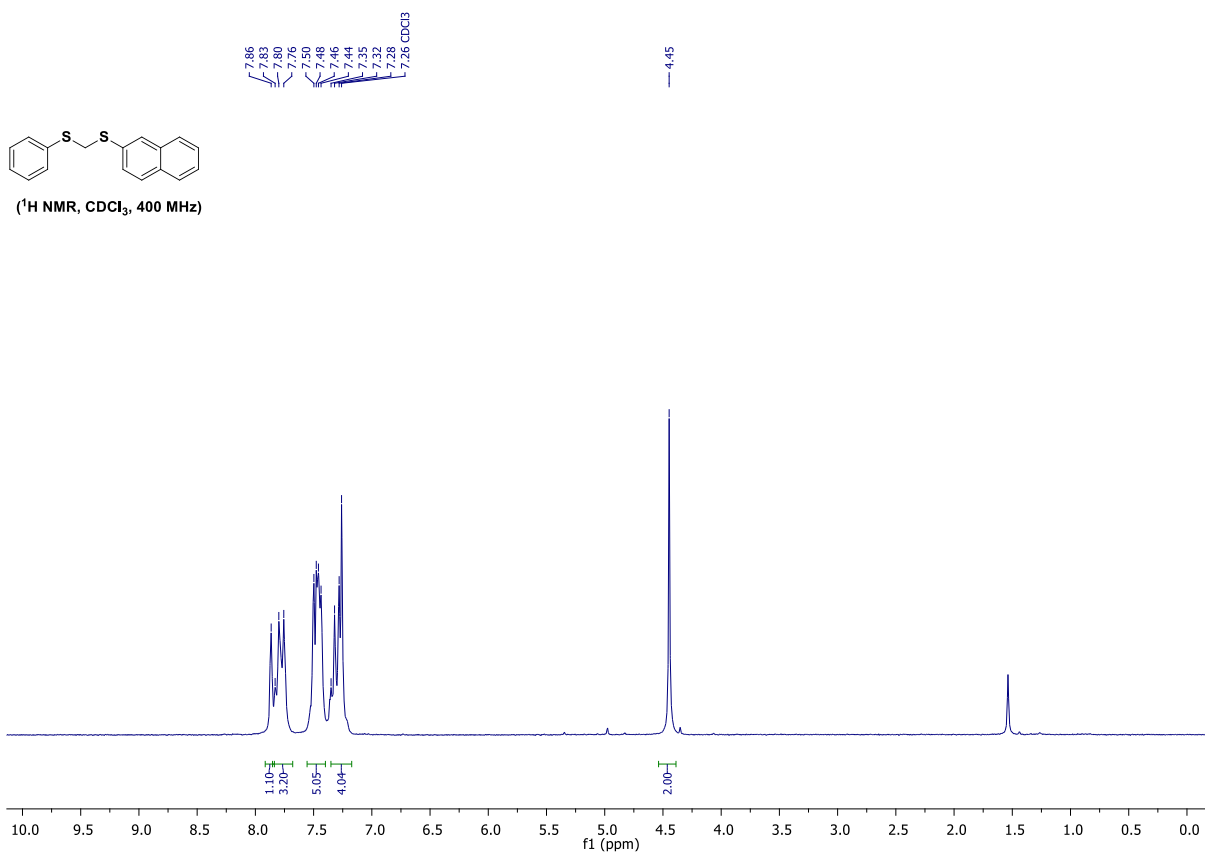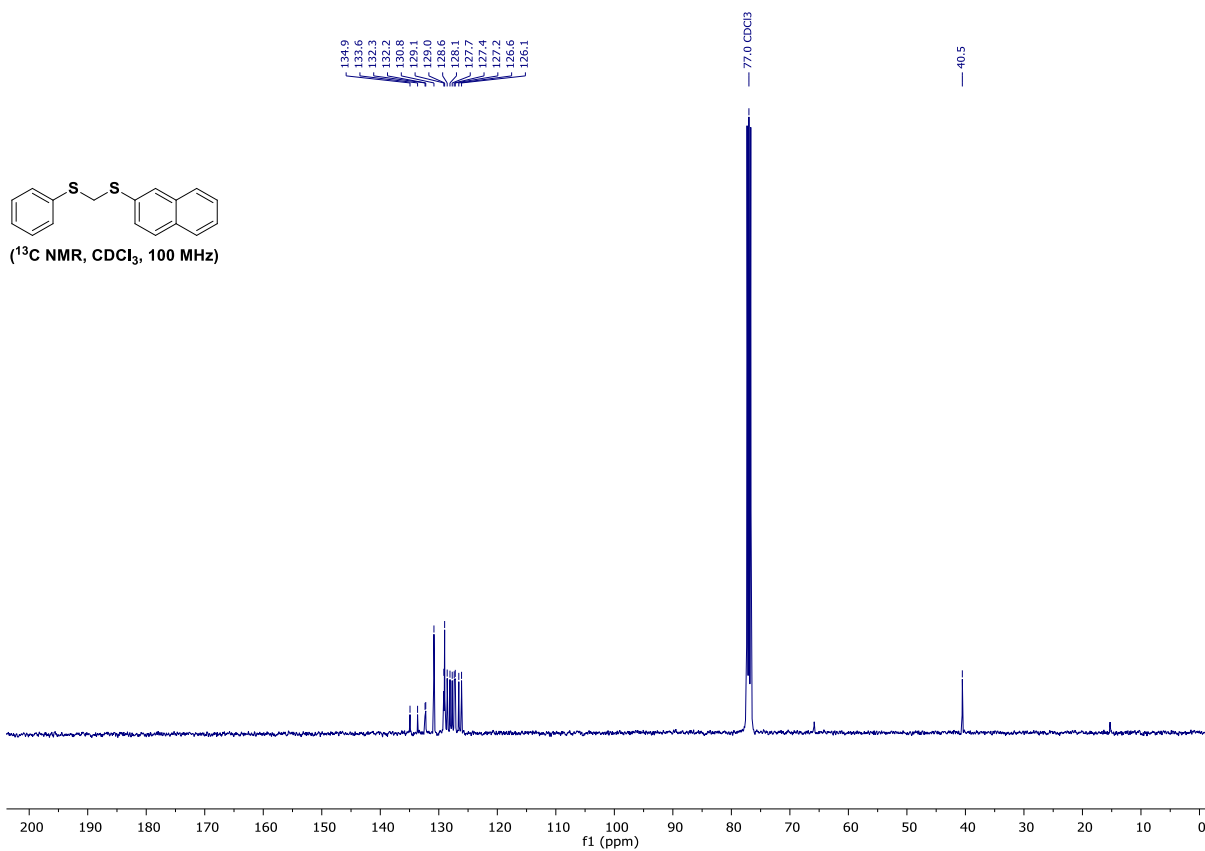

# {[(Cyclopentylsulfanyl)methyl]sulfanyl}benzene (11)

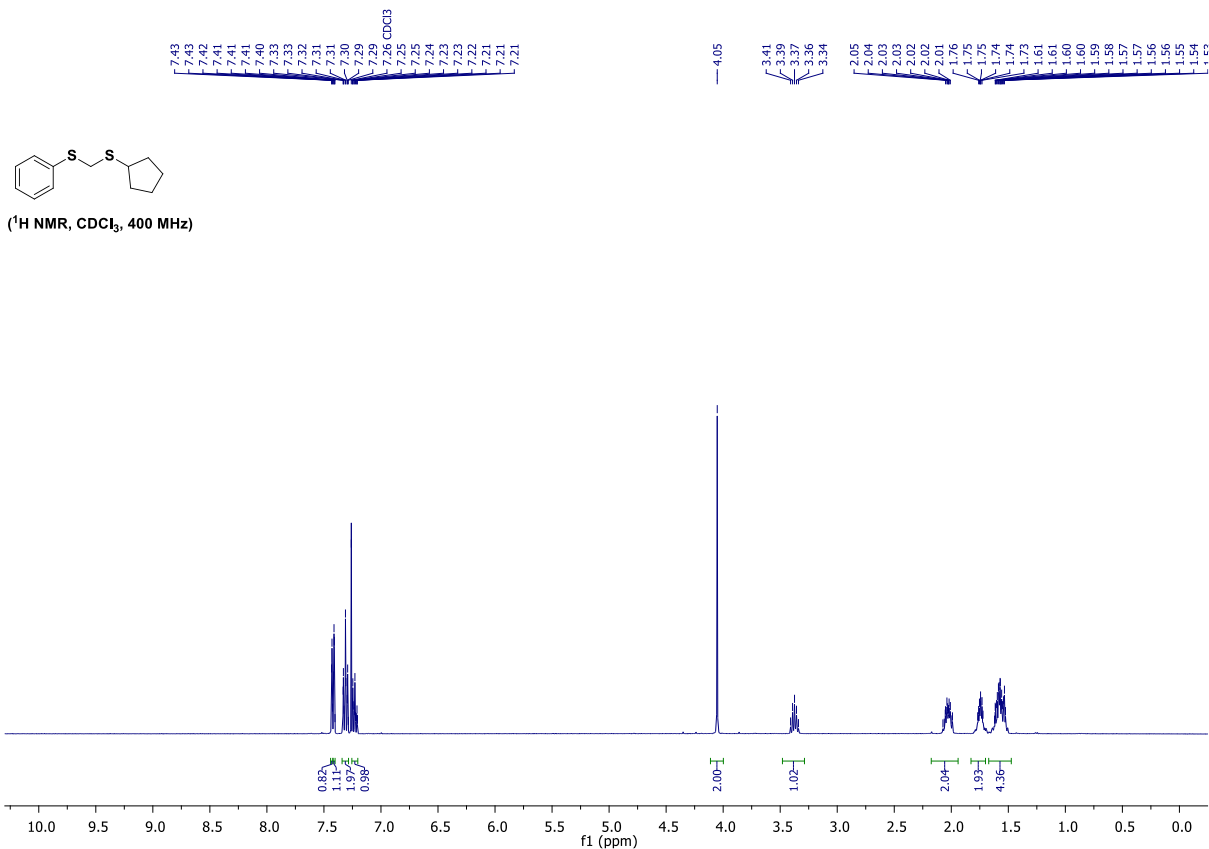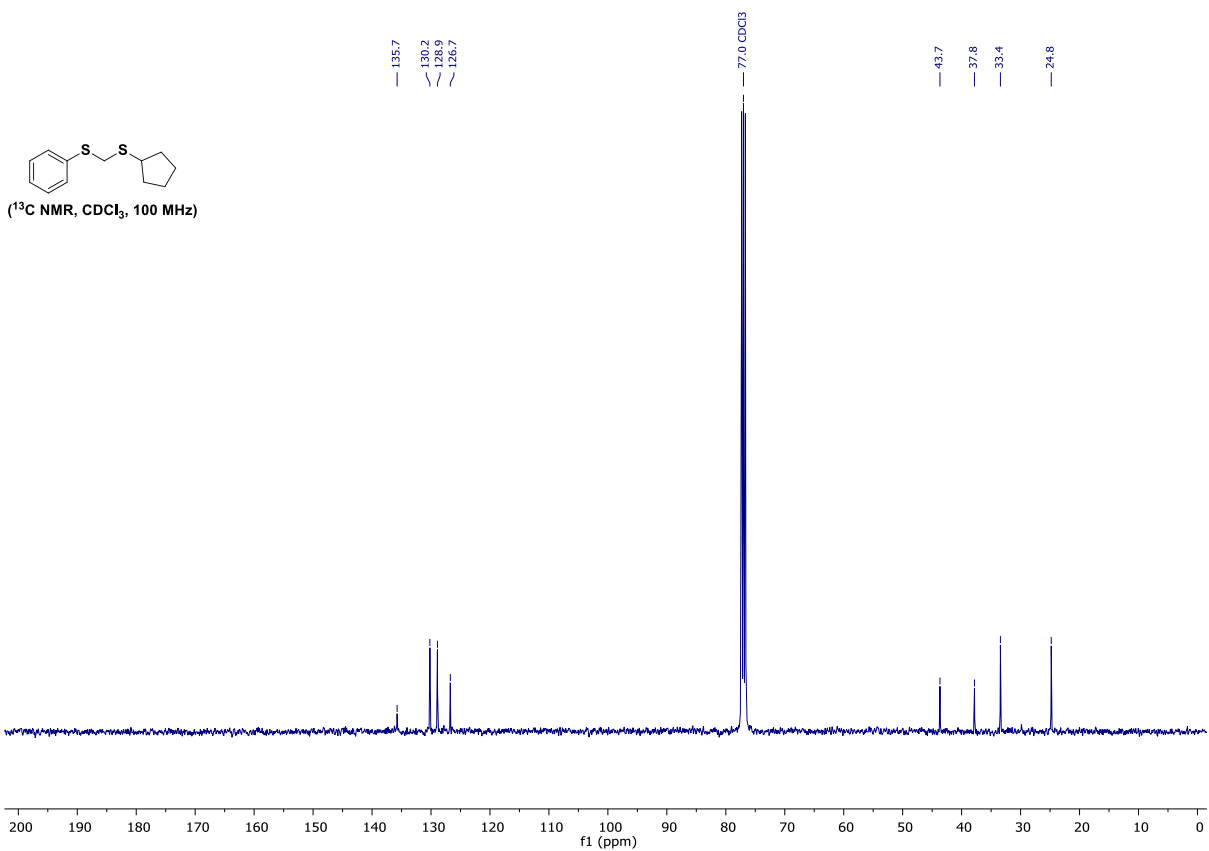

# [[[(Cyclohexylsulfanyl)methyl]sulfanyl]benzene (12)

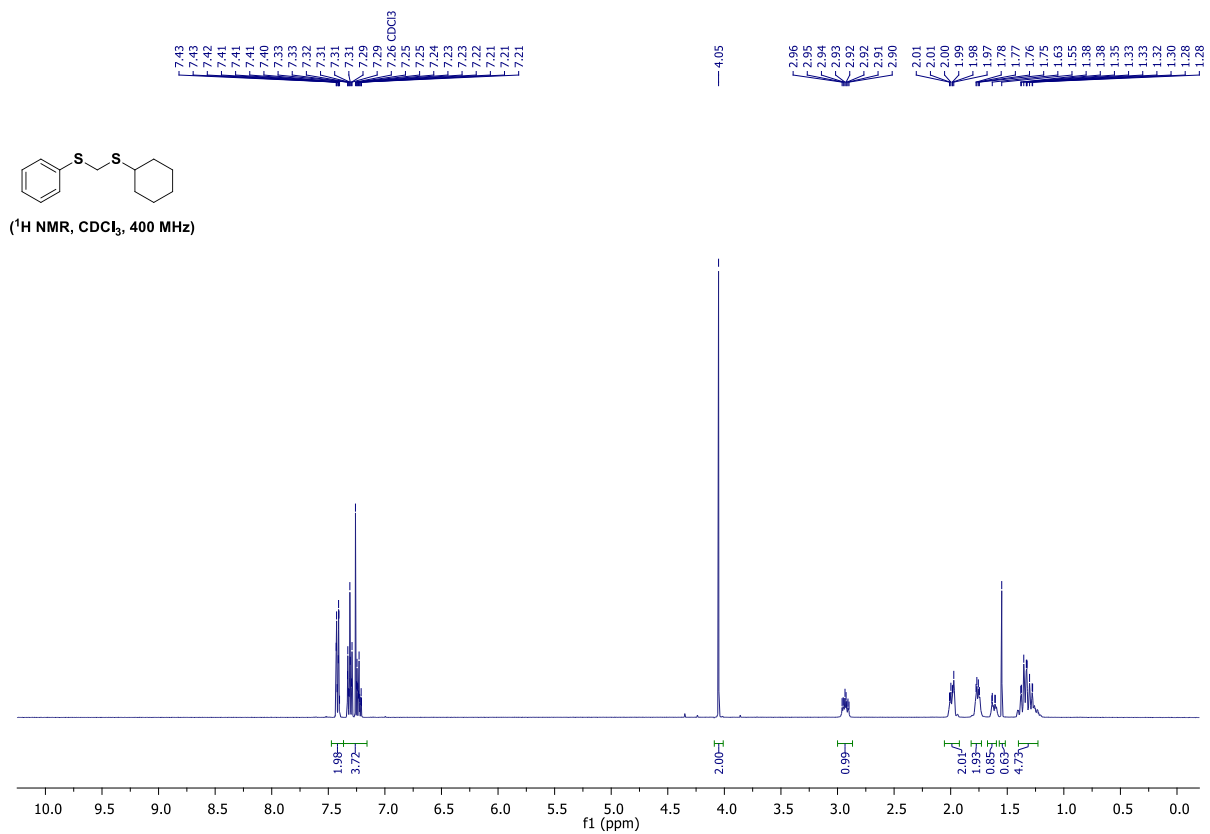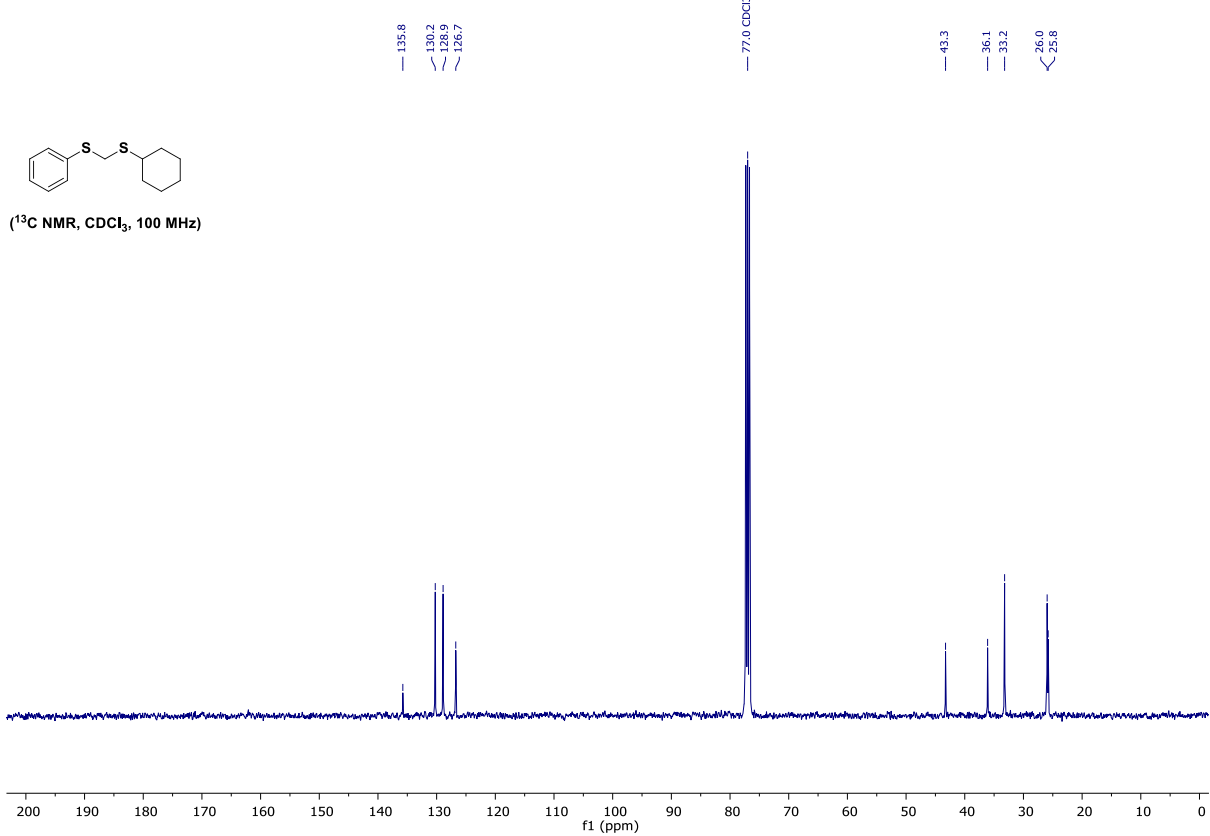

# 1,1',1''-{[[(Phenylsulfanyl)methyl]sulfanyl]methanetriyl}tribenzene (13)

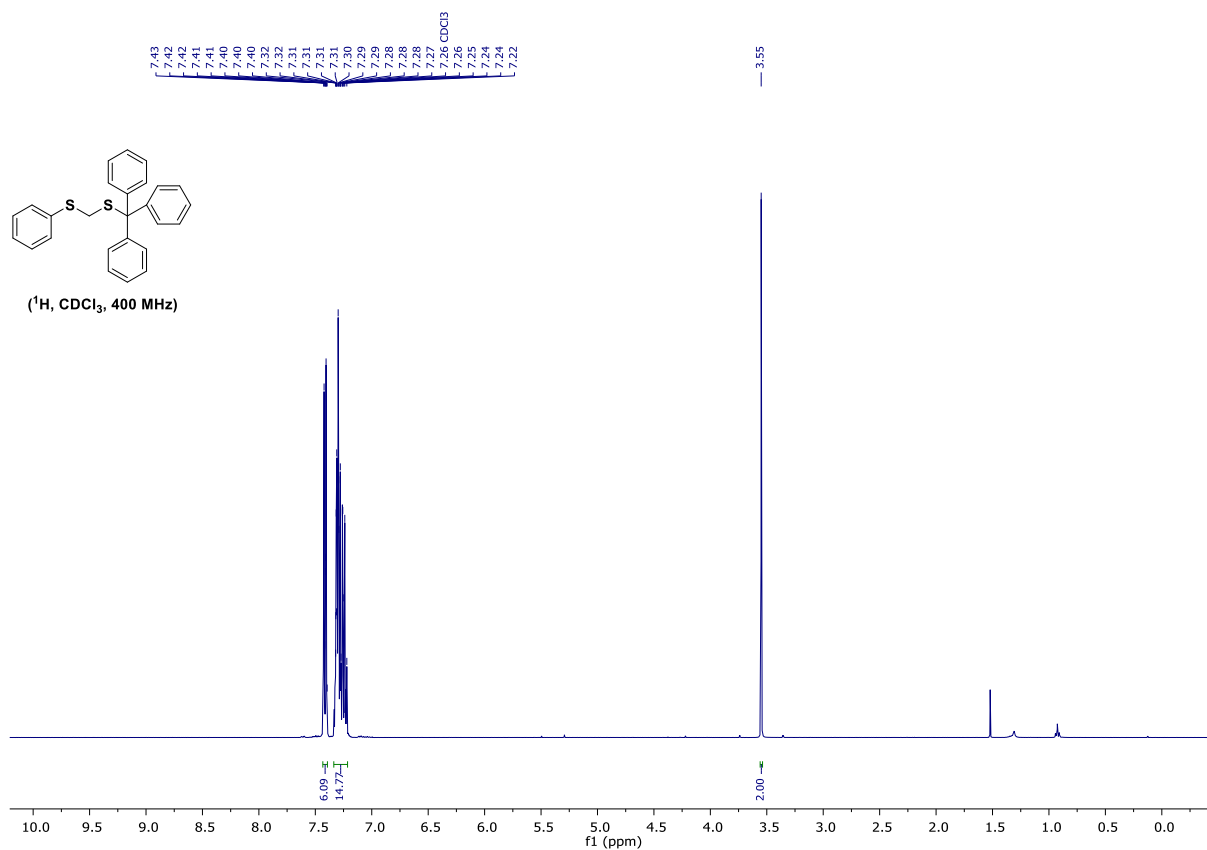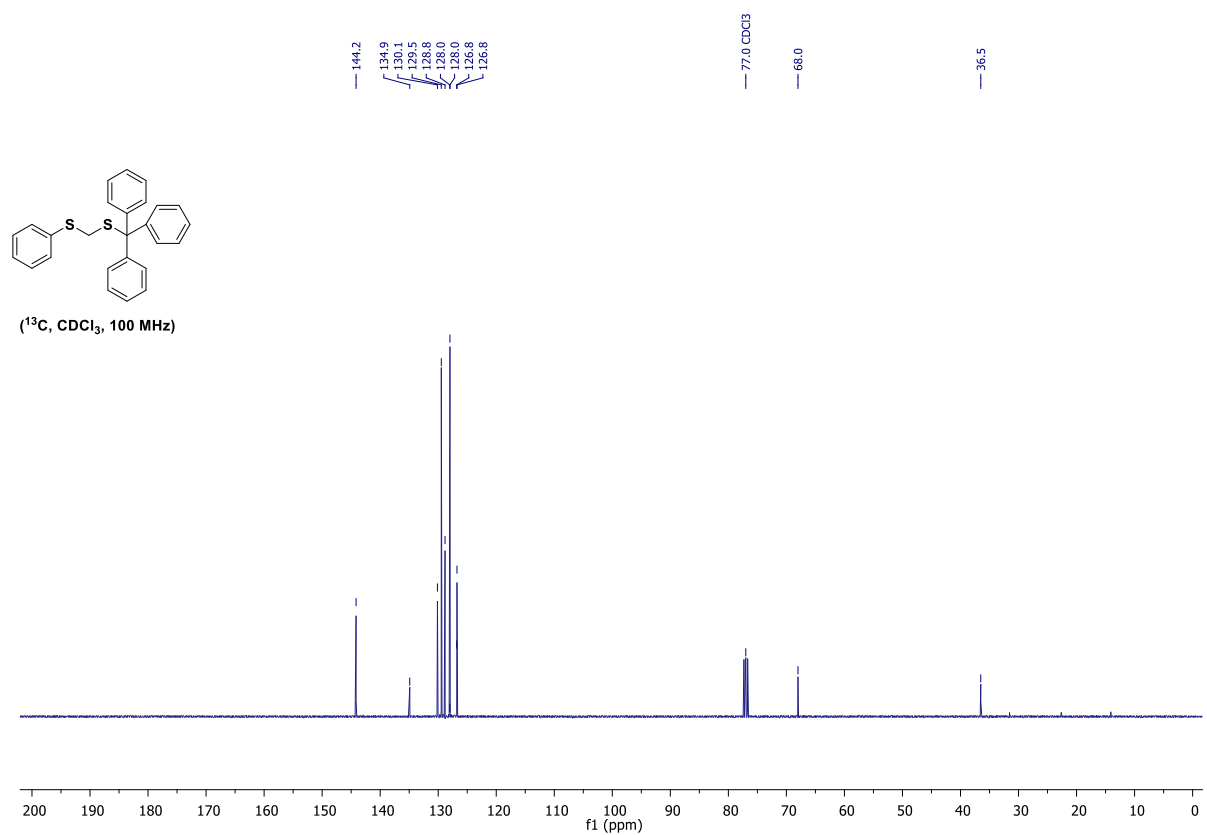



# {[(Benzylsulfanyl)methyl]sulfanyl}benzene (14)

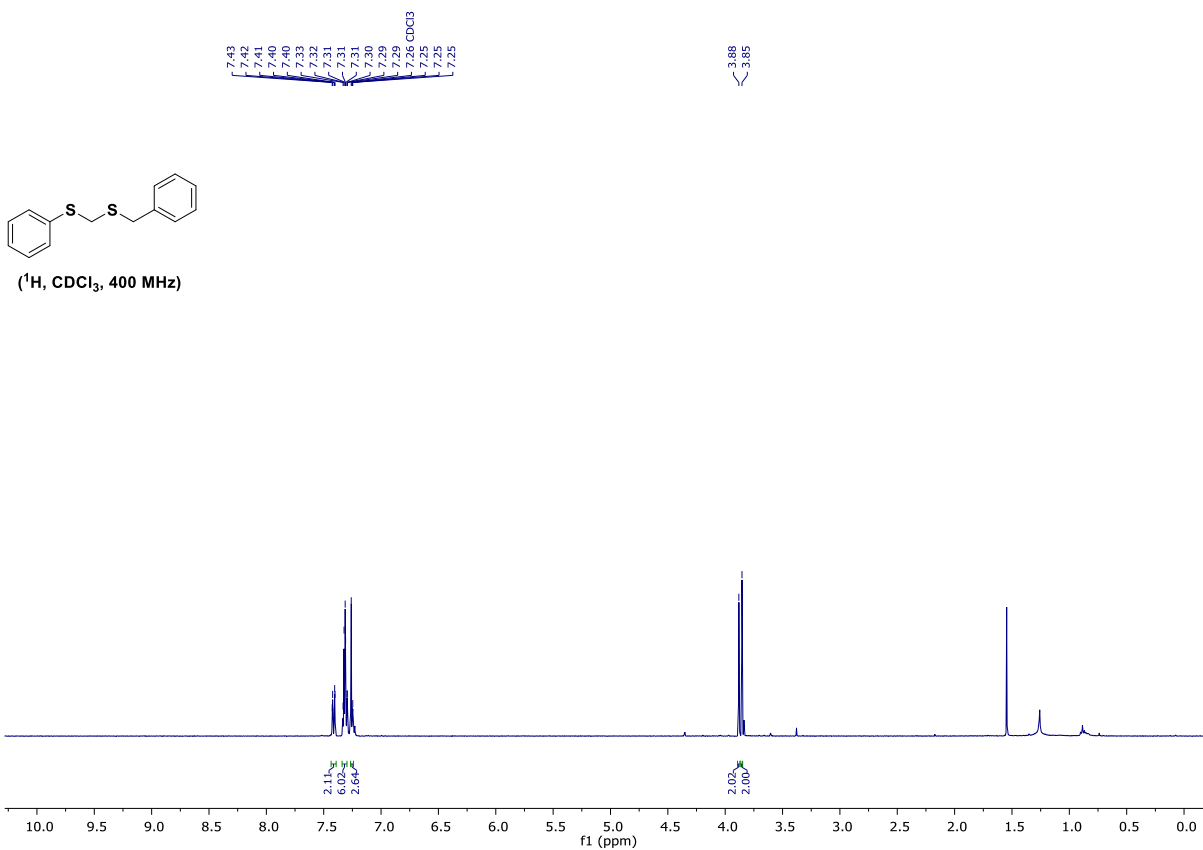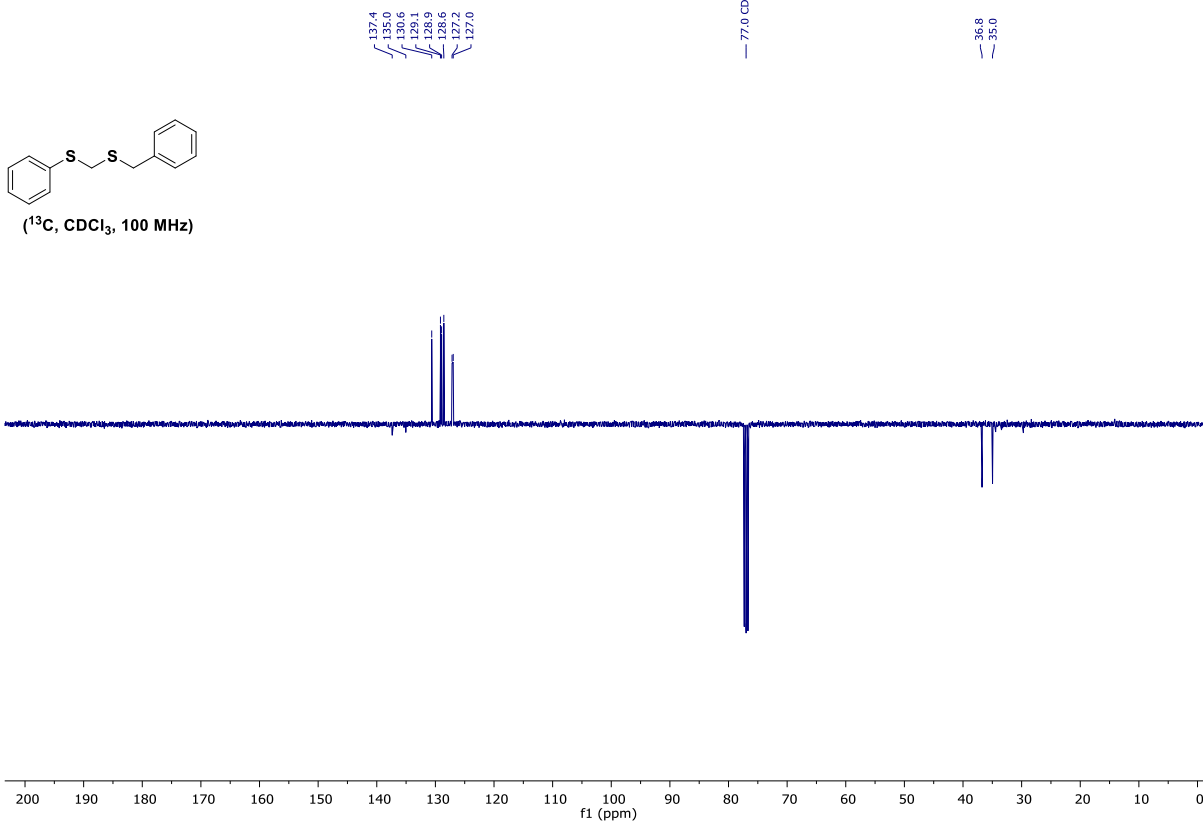

## 2-[[Phenylsulfanyl)methyl]sulfanyl]-1,3-benzoxazole (15)

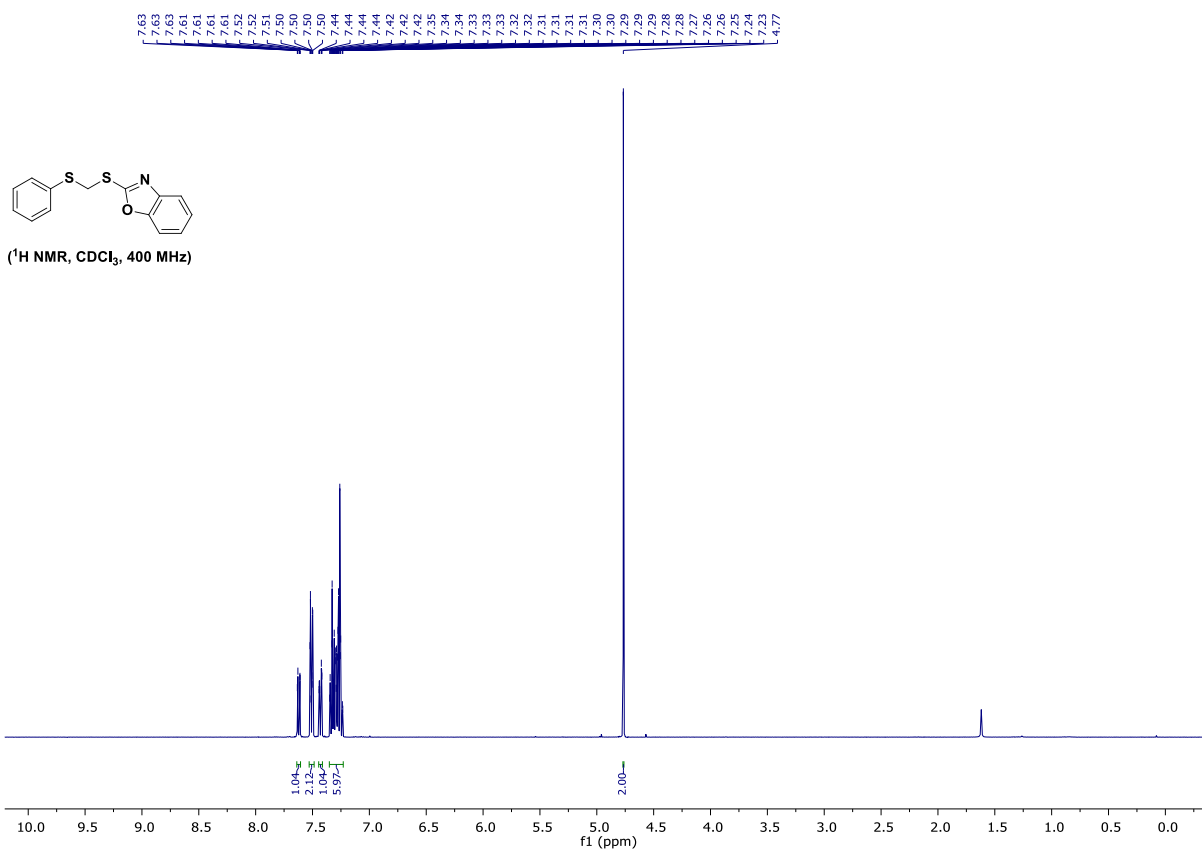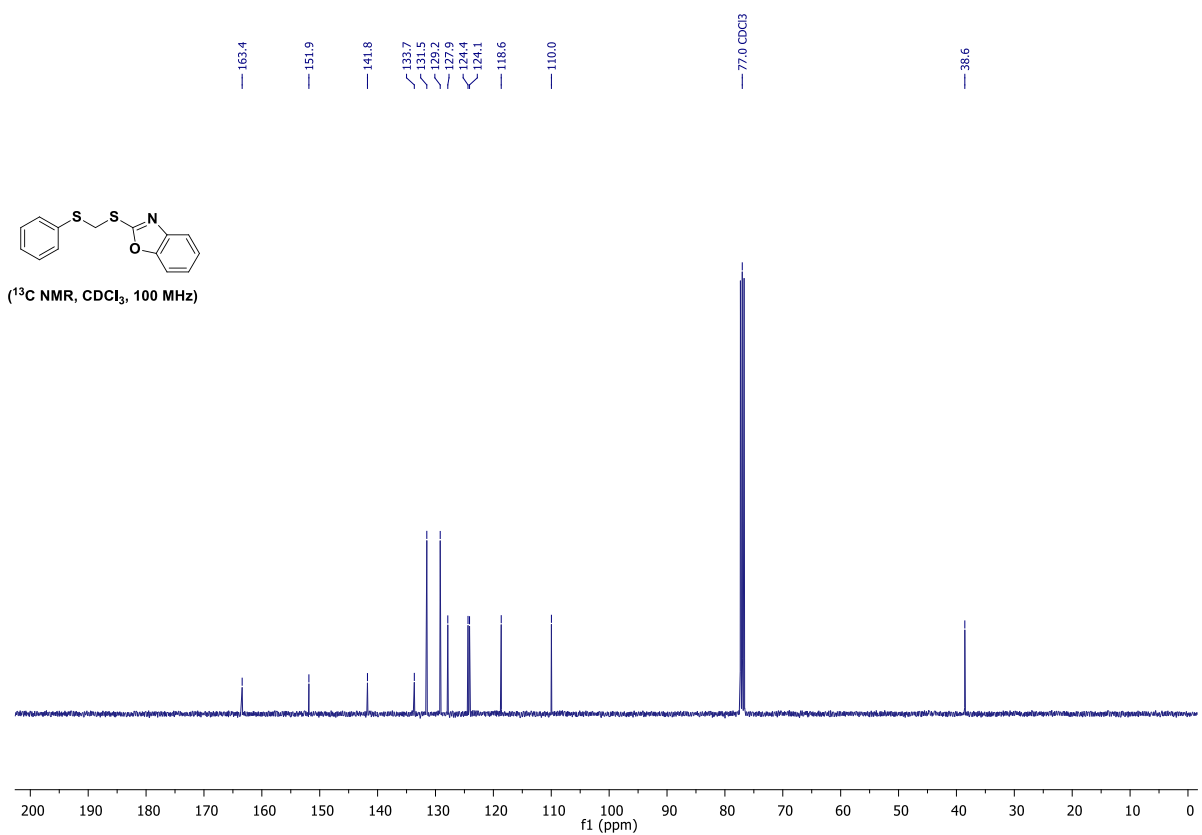

# 1-Bromo-4-[[[(methylsulfanyl)methyl]sulfanyl]benzene (16)

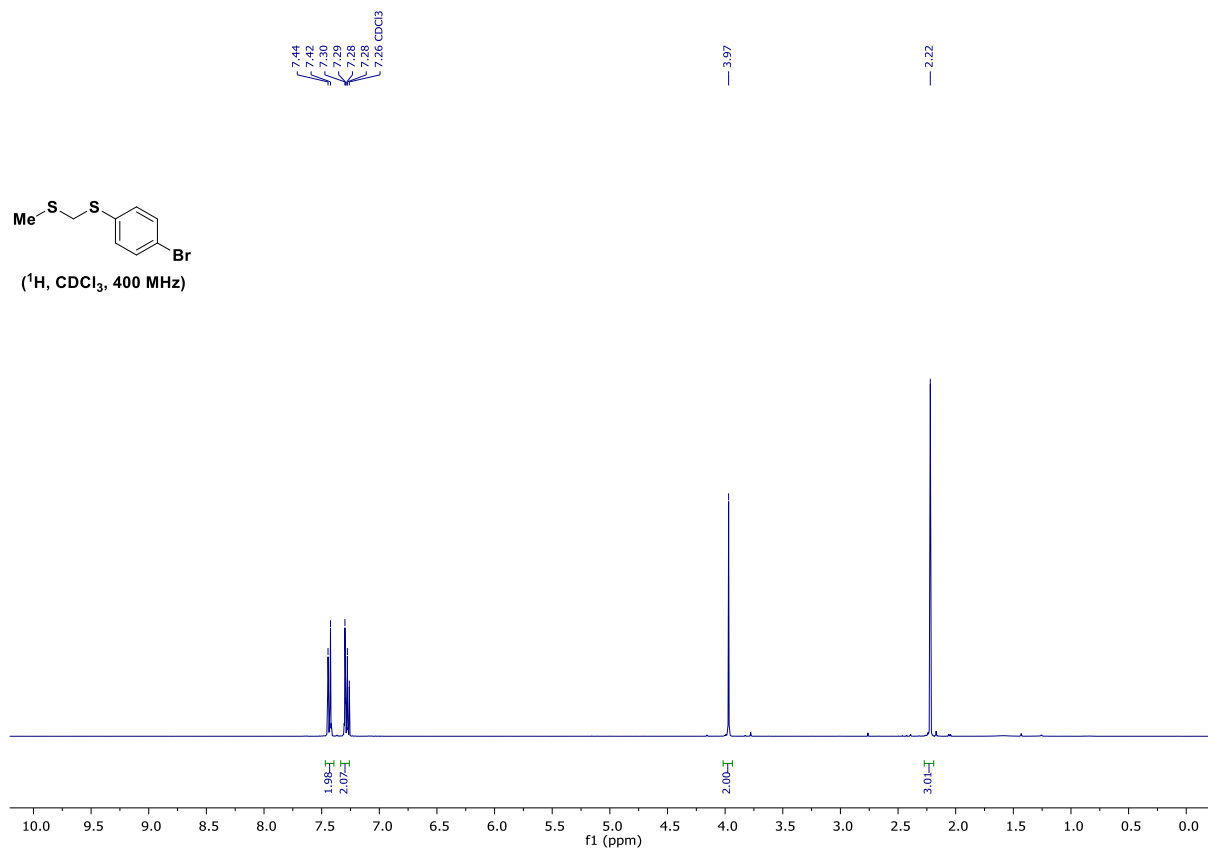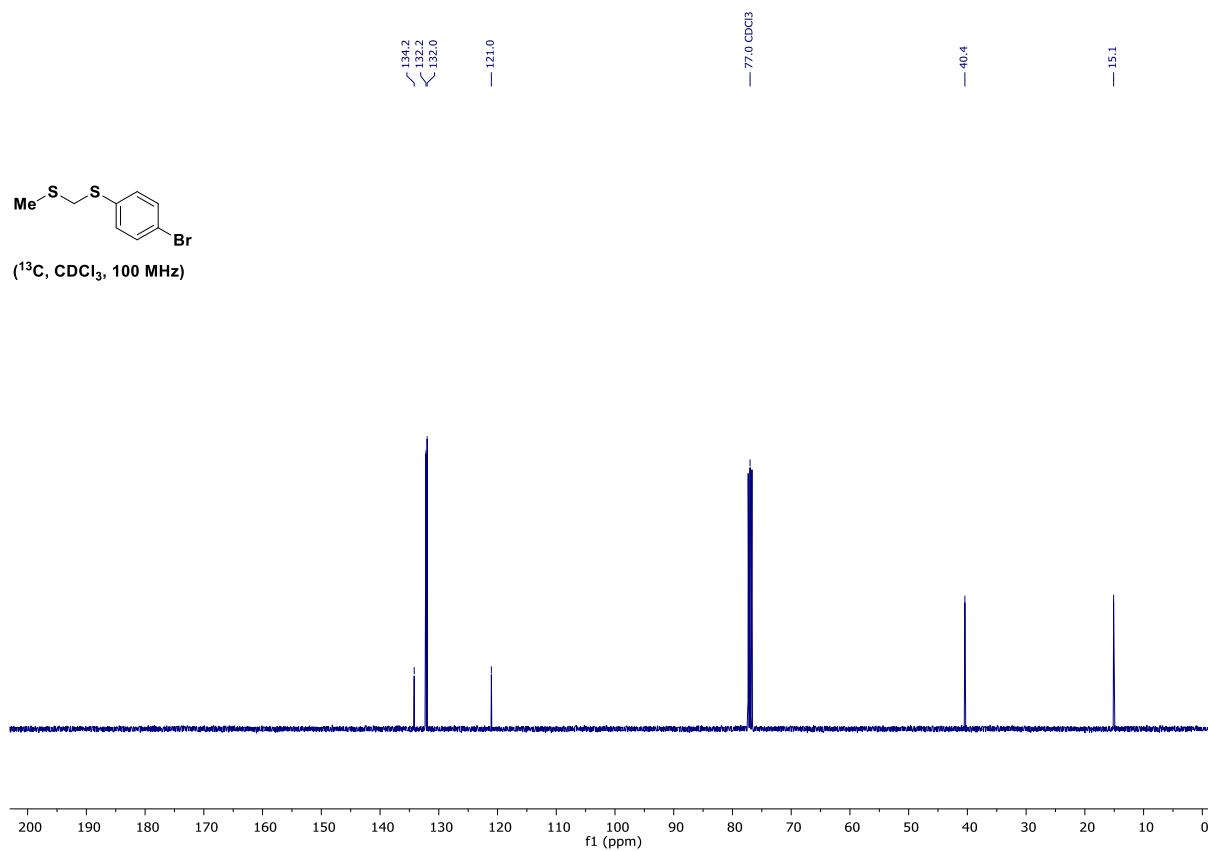

# 1-Chloro-4-[[[(methylsulfanyl)methyl]sulfanyl]benzene (17)

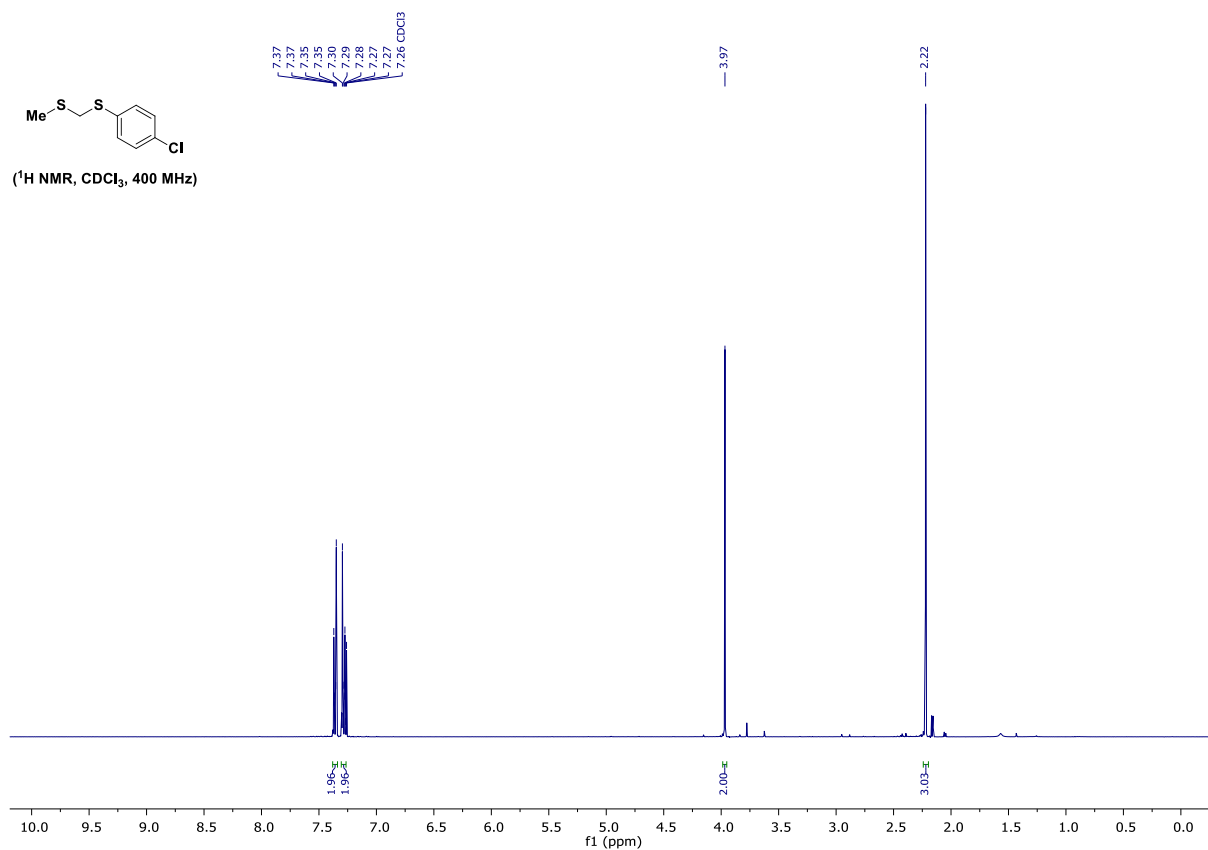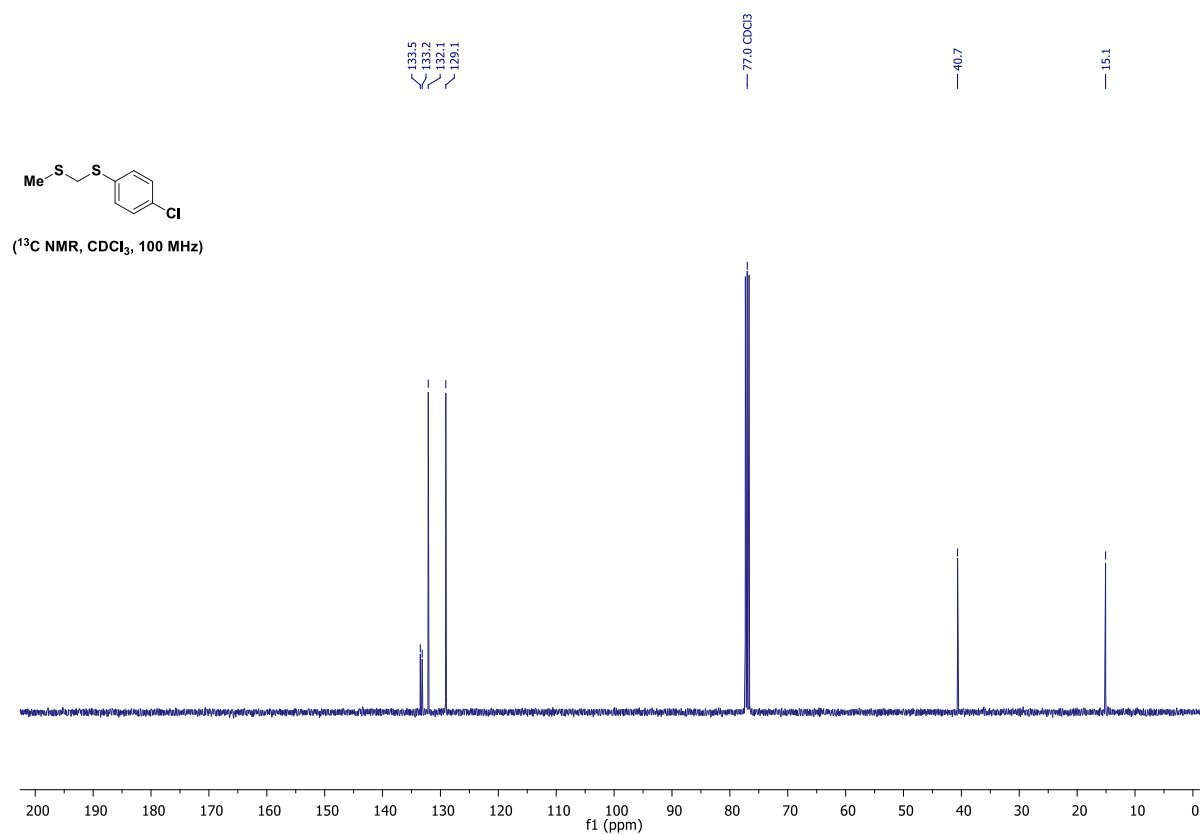

# 1,3-Dichloro-2-[[[(methylsulfonyl)methyl]sulfonyl]benzene (18)

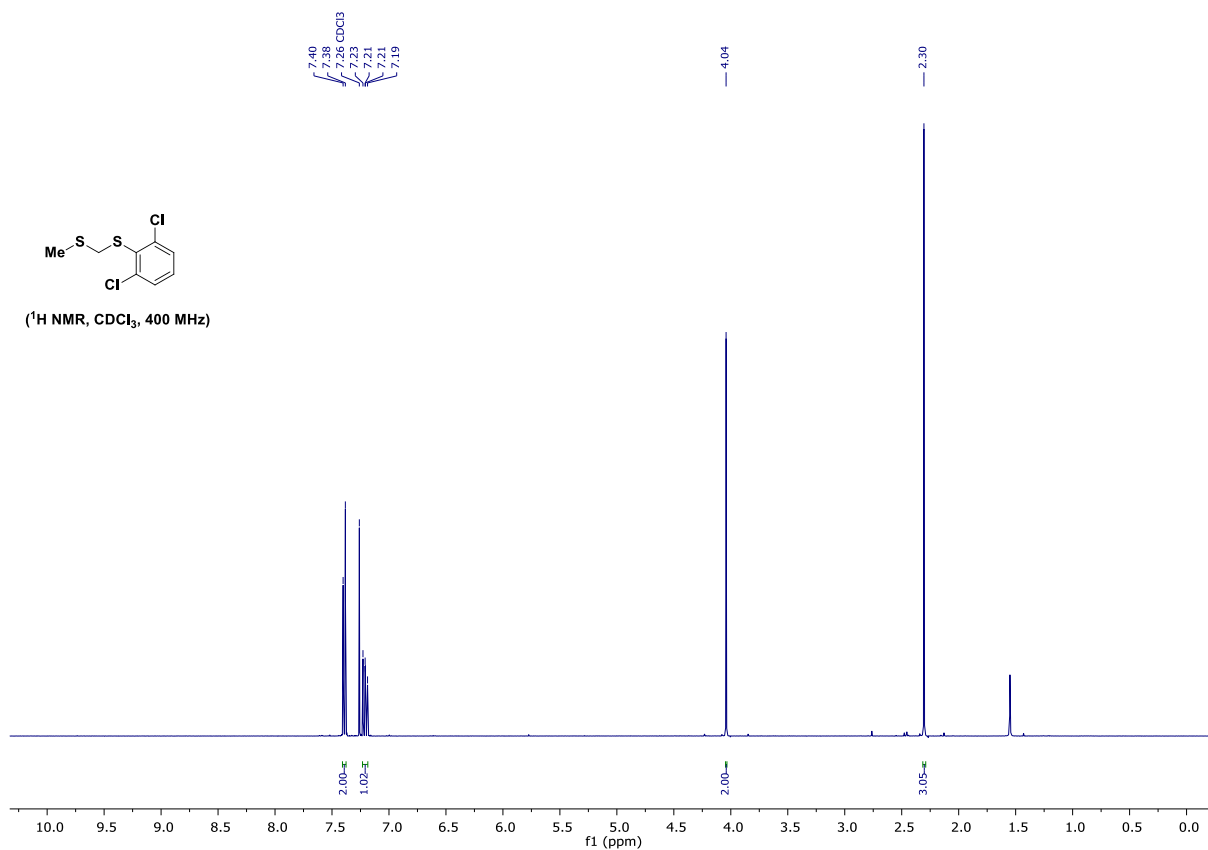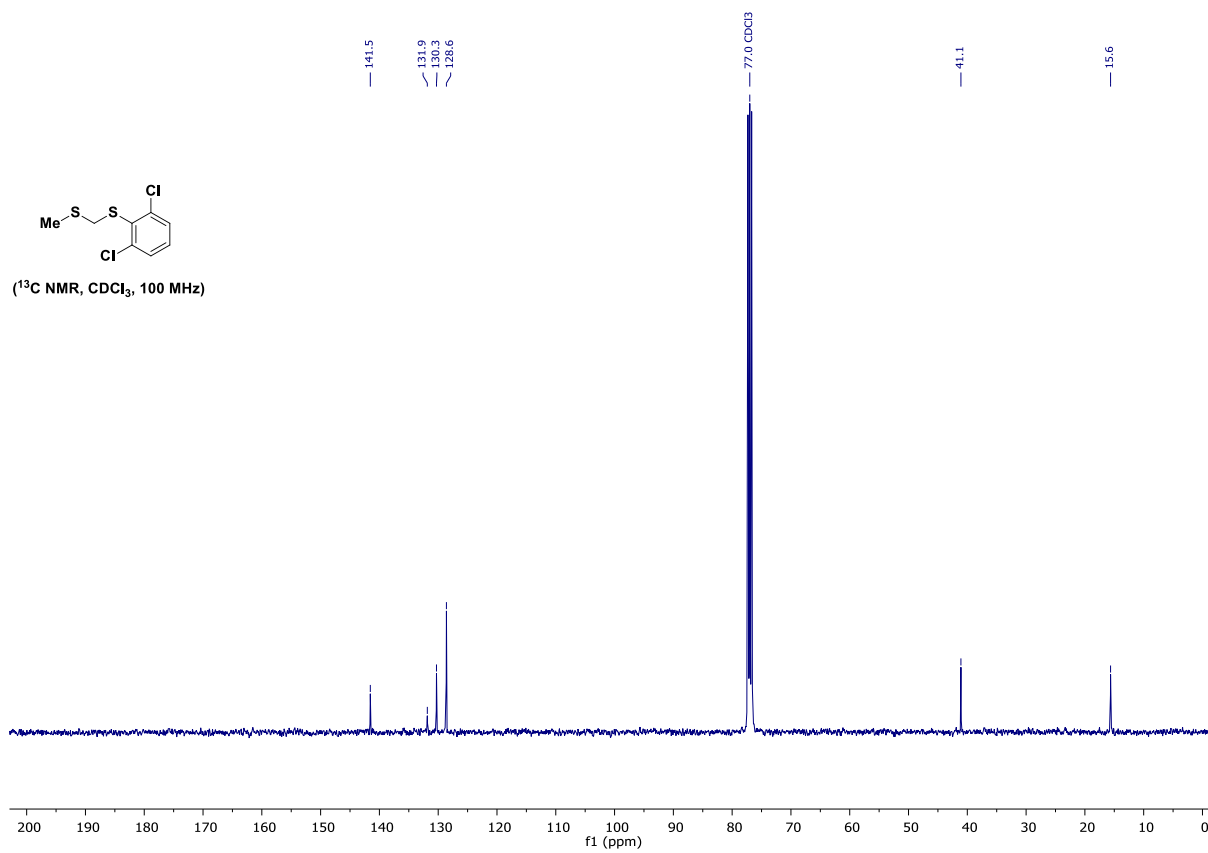

# 1-Fluoro-3-[[[(methylsulfonyl)methyl]sulfonyl]benzene (19)

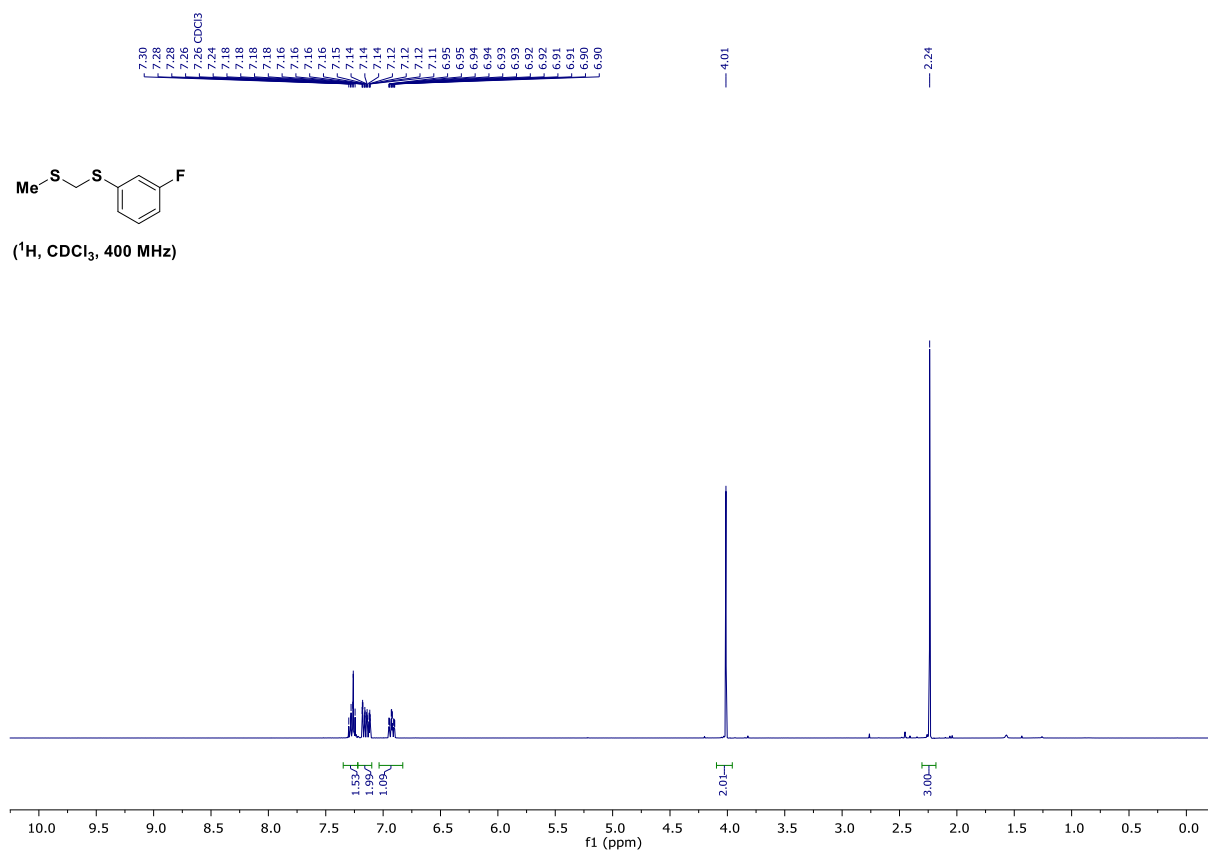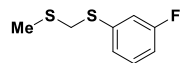

(<sup>1</sup>H, CDCl<sub>3</sub>, 400 MHz)

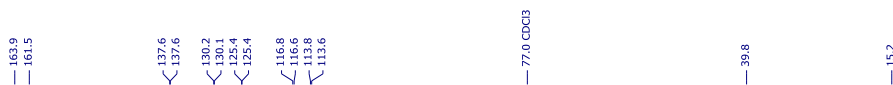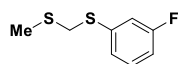

(<sup>13</sup>C, CDCl<sub>3</sub>, 100 MHz)

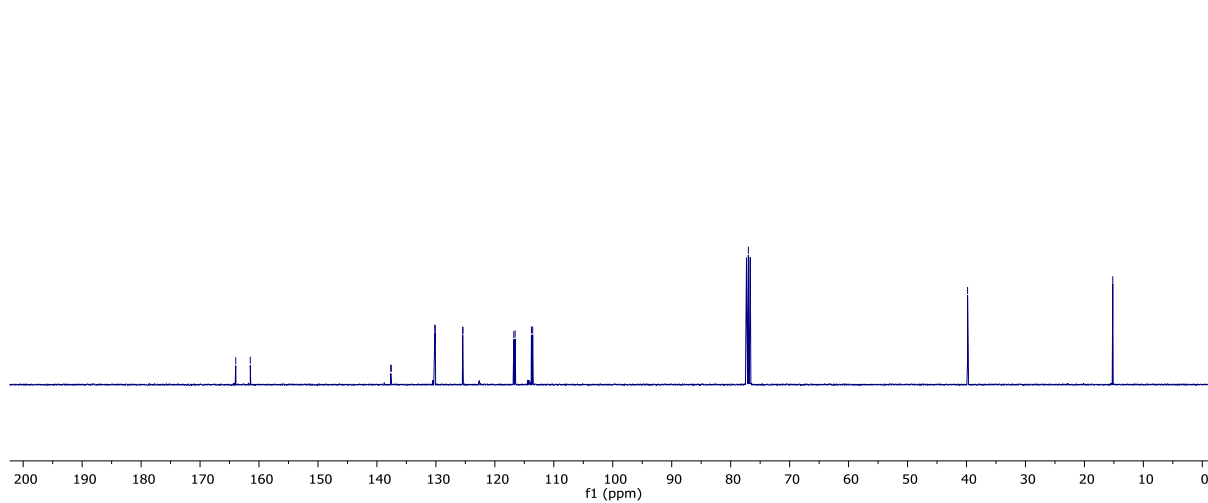

# 1-[[[(Methylsulfanyl)methyl]sulfanyl]-4-nitrobenzene (20)

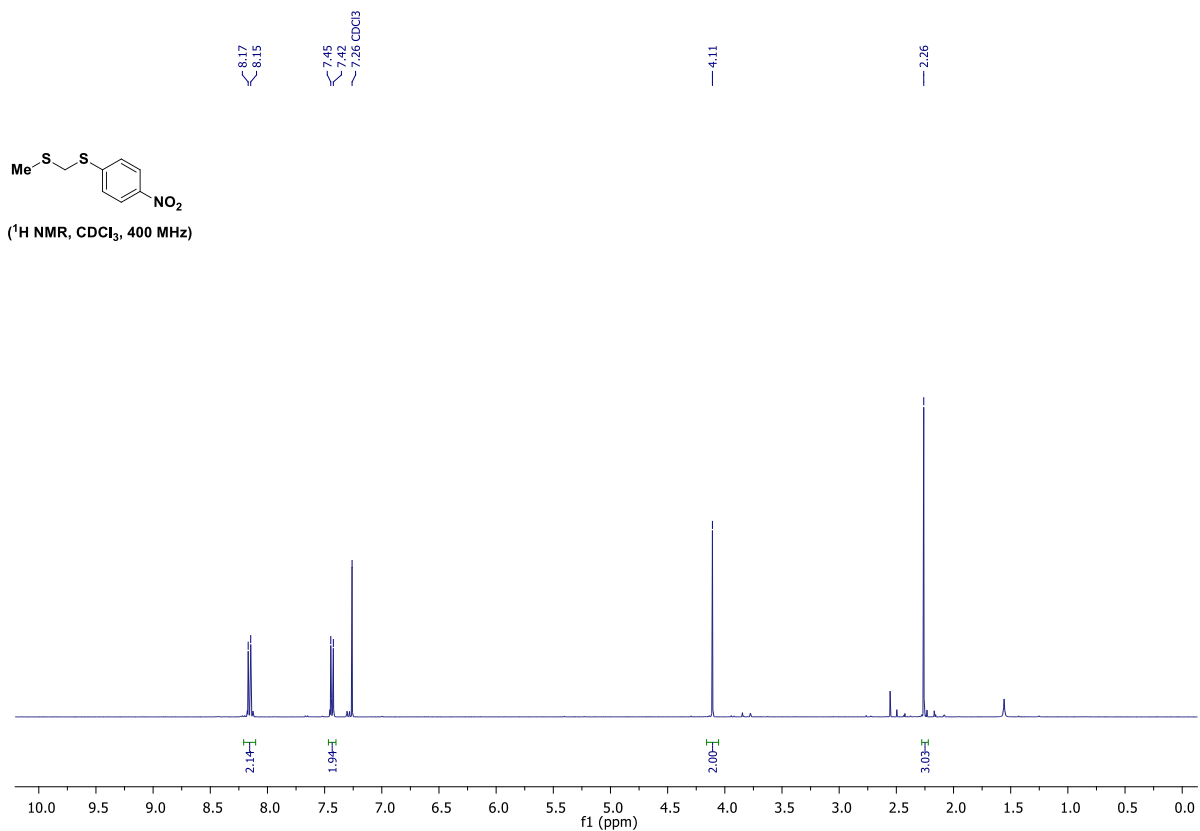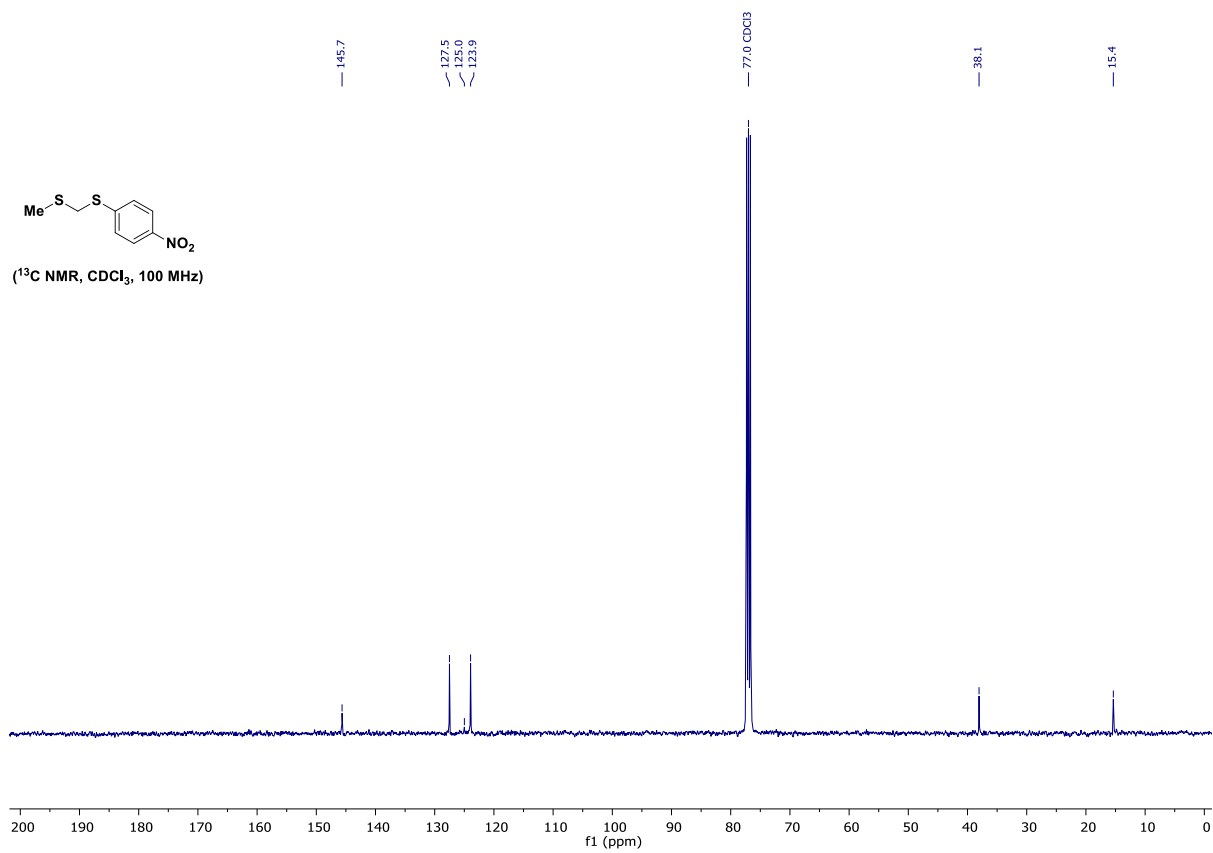

# 4-[[[(Methylsulfanyl)methyl]sulfonyl]aniline (21)

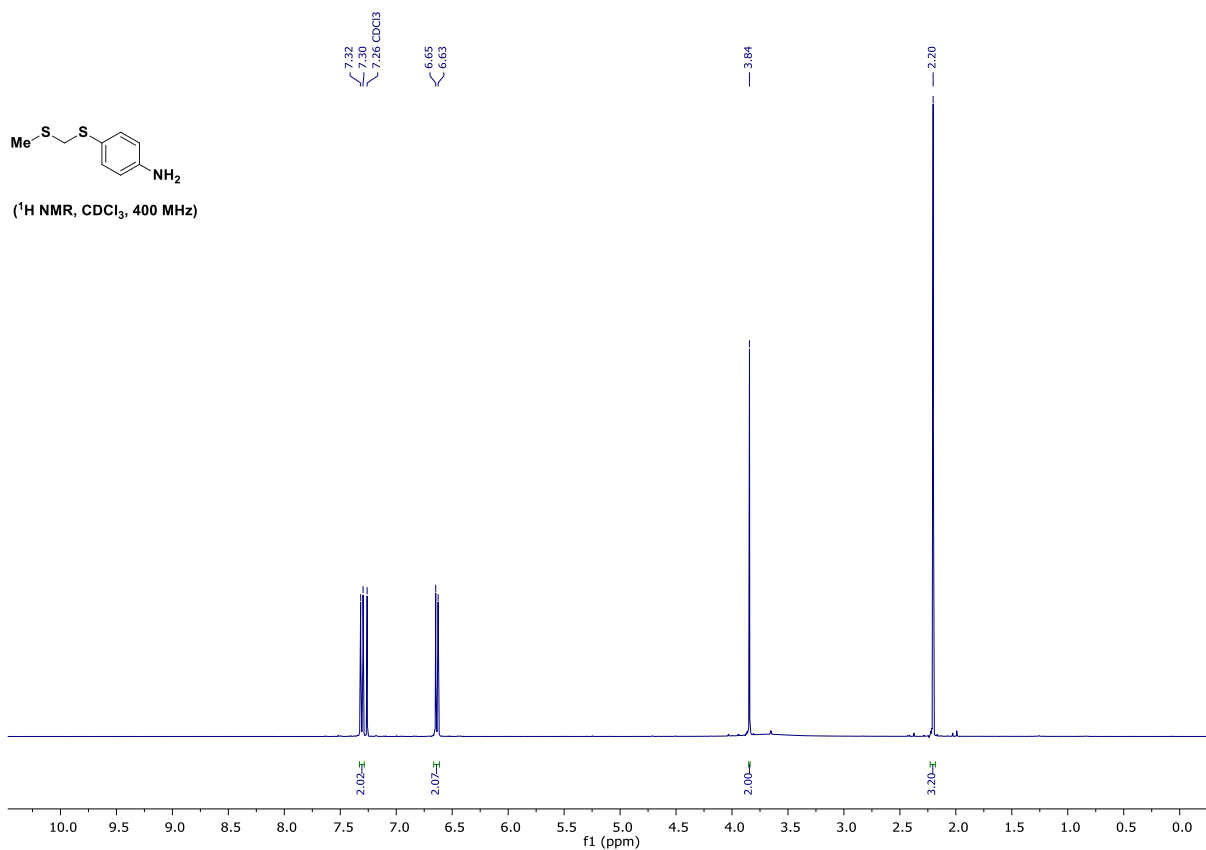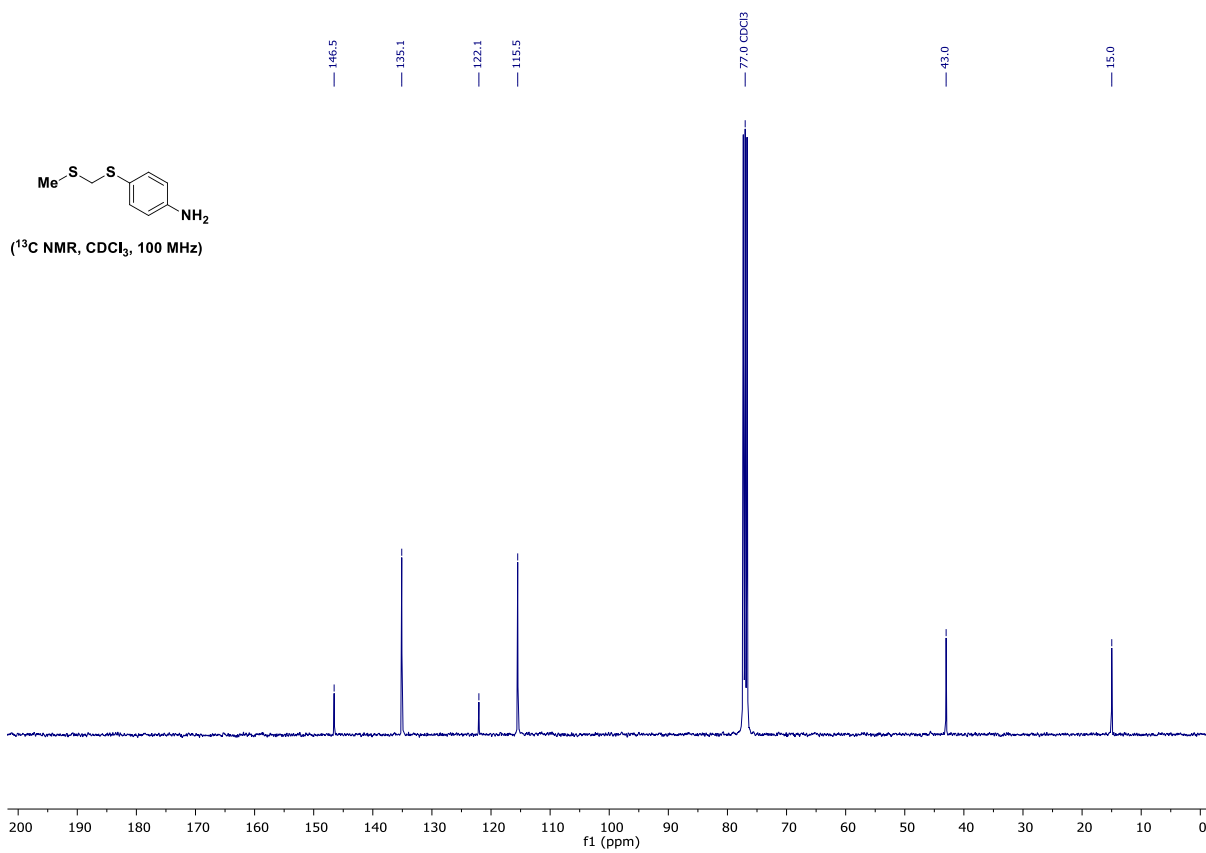



# {[(Methylsulfanyl)methyl]sulfanyl}benzene (22)

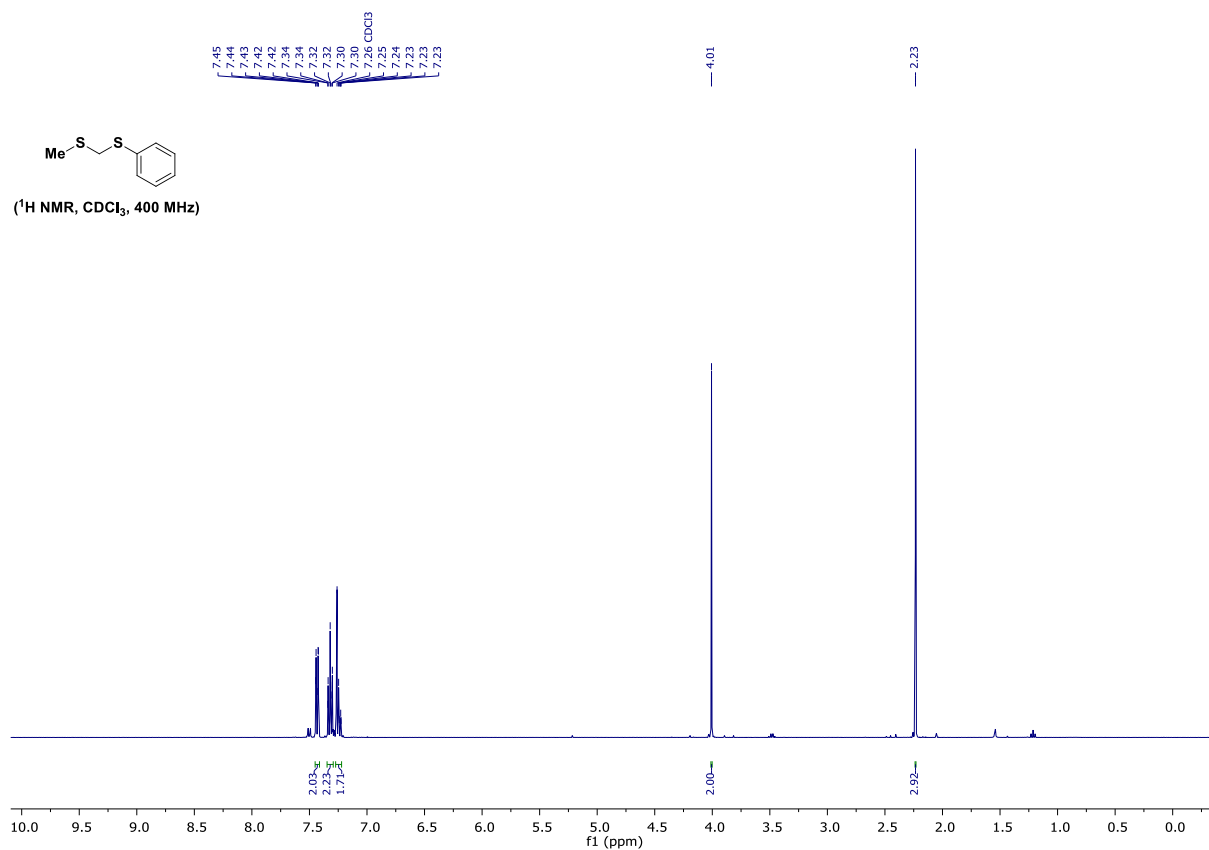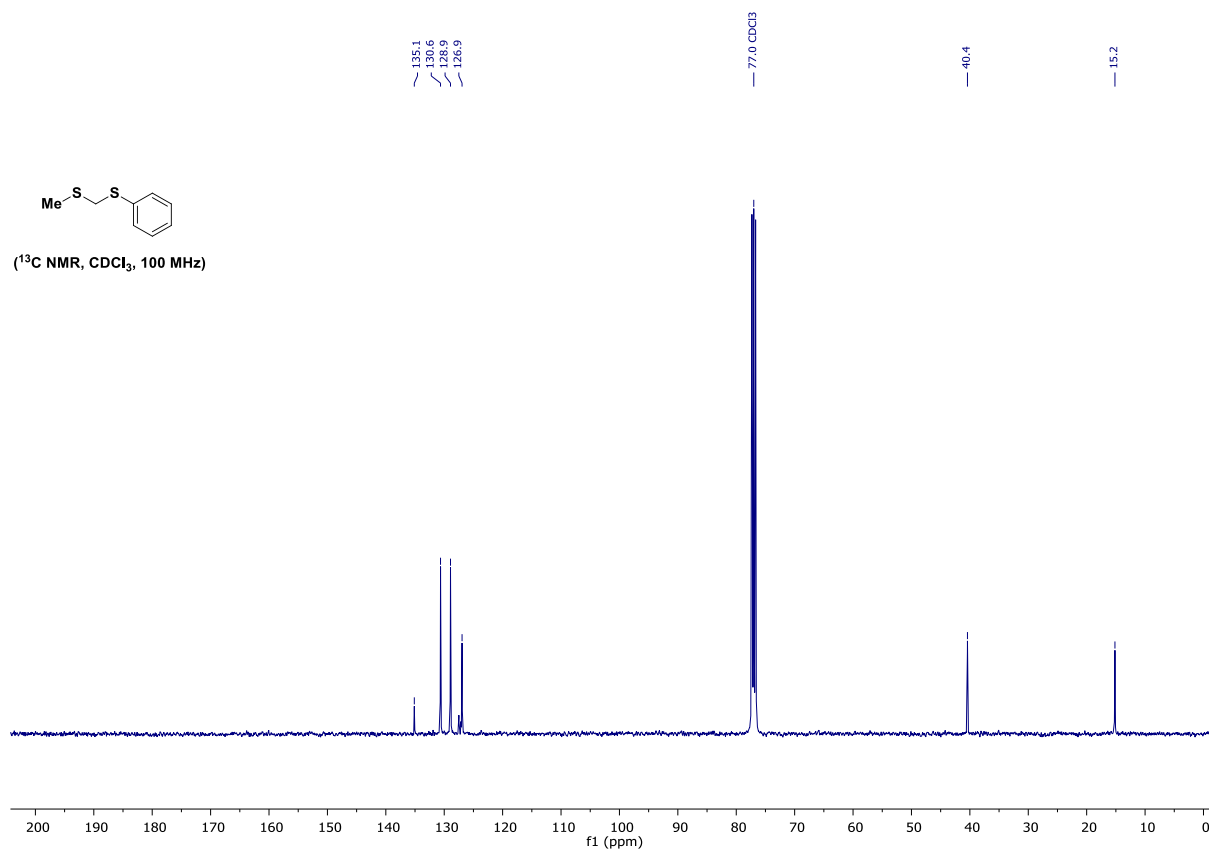

# 1-Methyl-4-[[[(methylsulfanyl)methyl]sulfanyl]benzene (23)

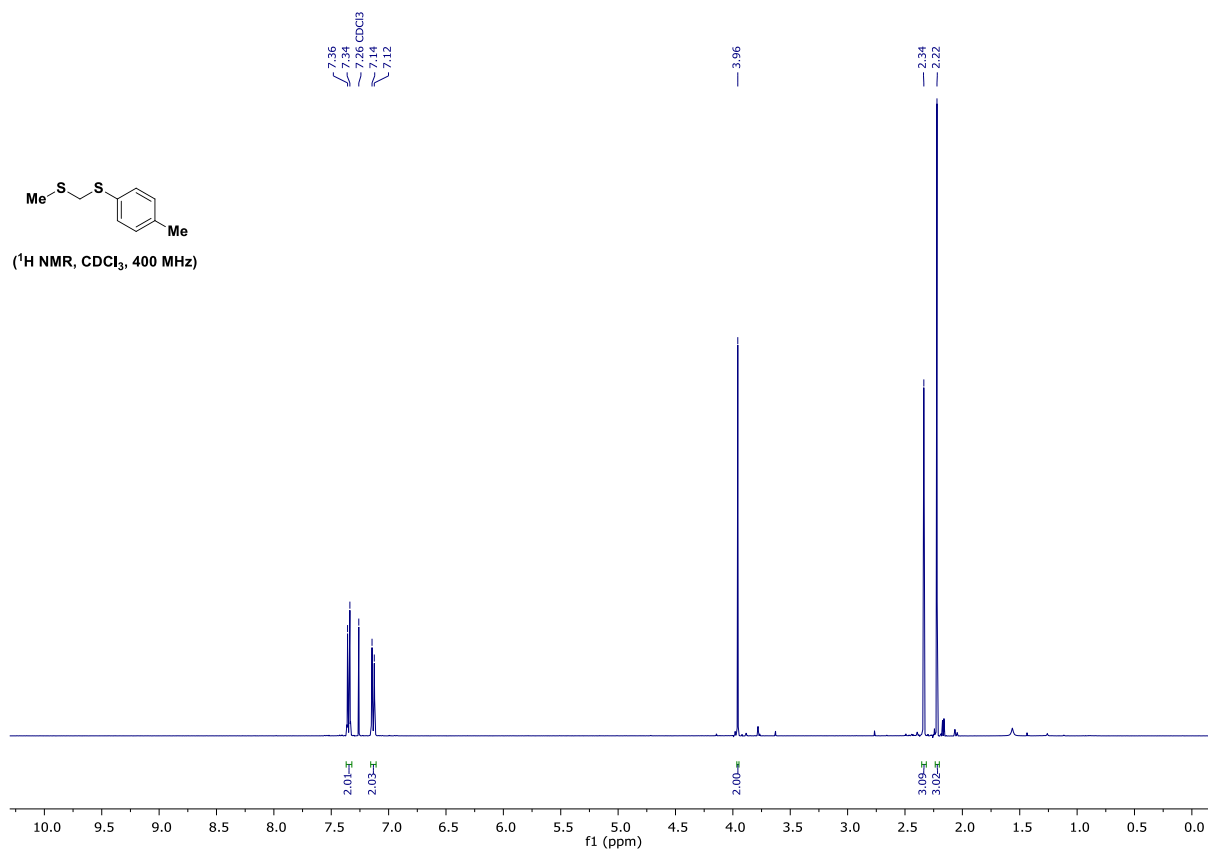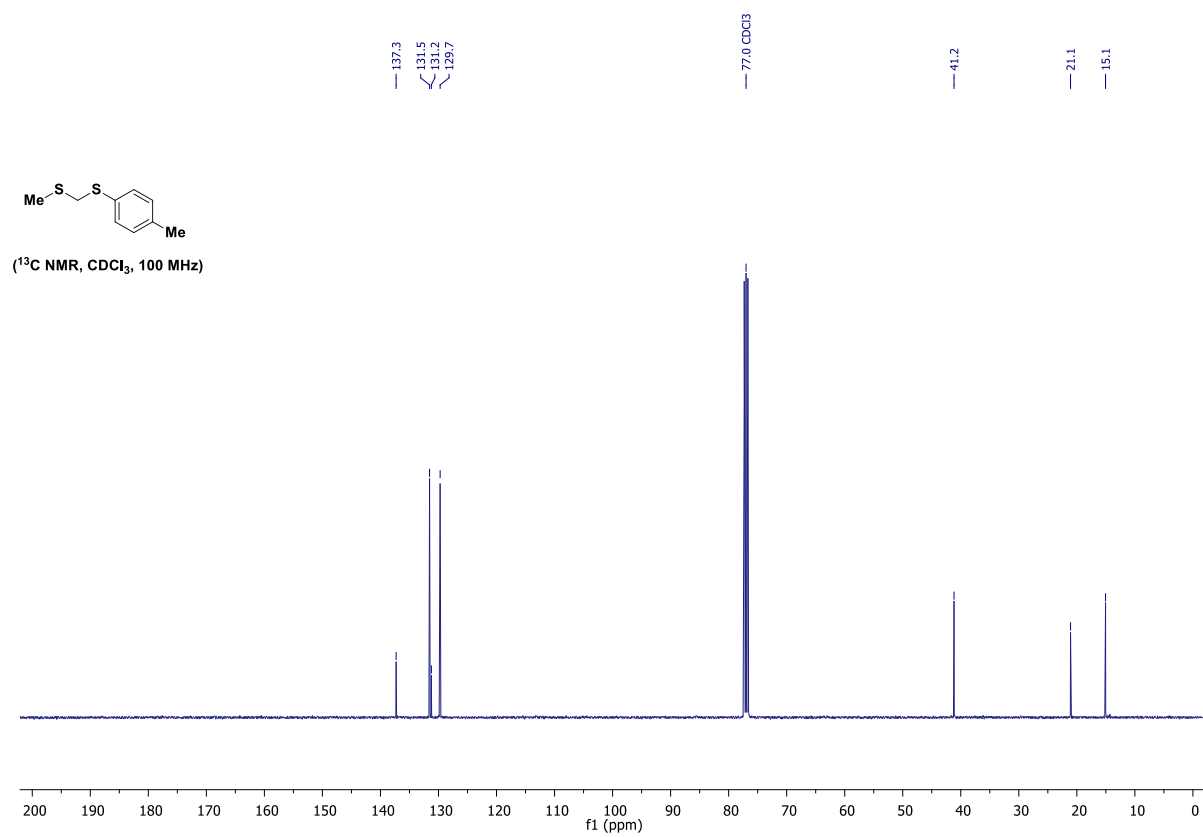

**1-(2-Methyl-2-propanyl)-4-(((methylsulfanyl)methyl)sulfanyl)methyl)benzene (24)**

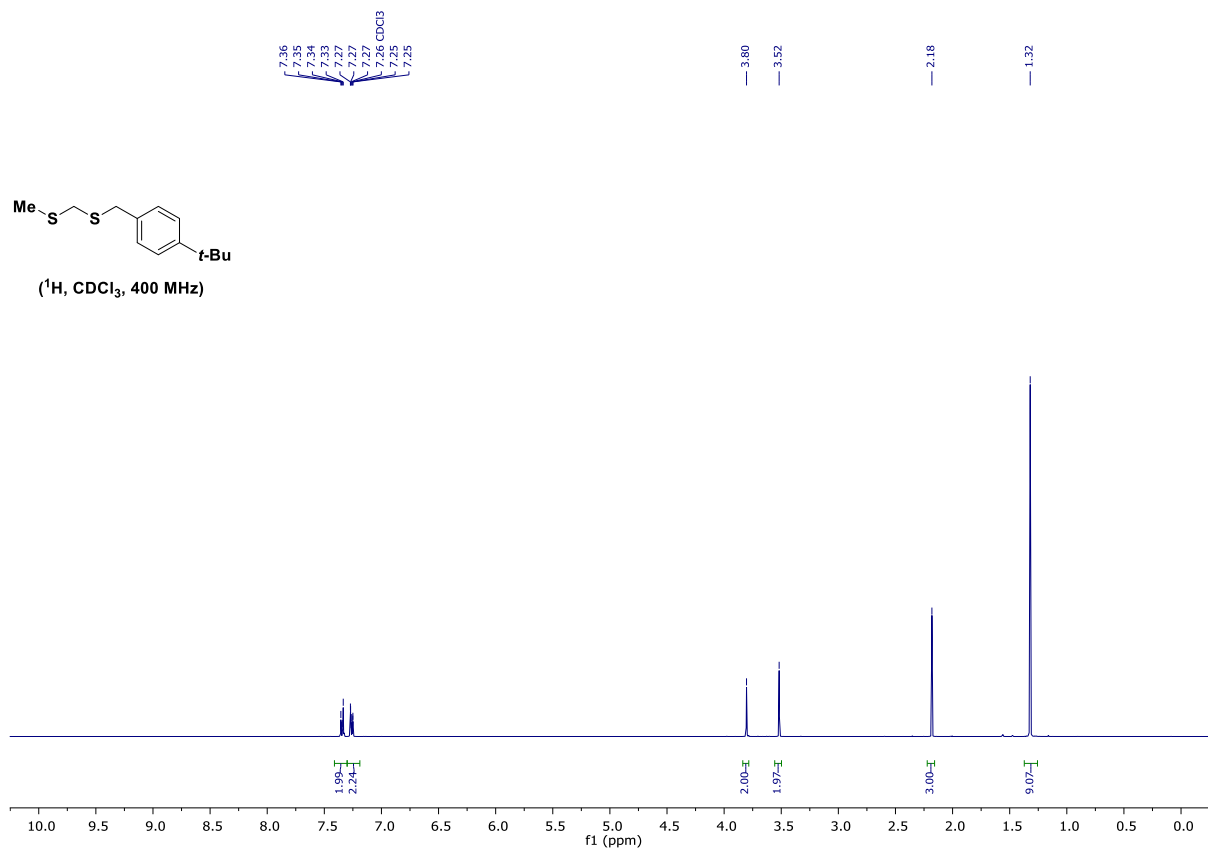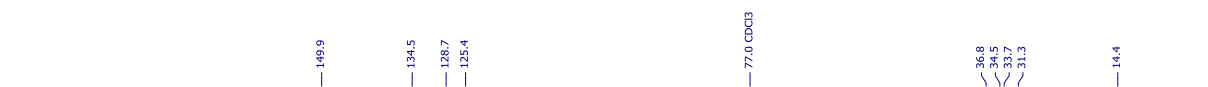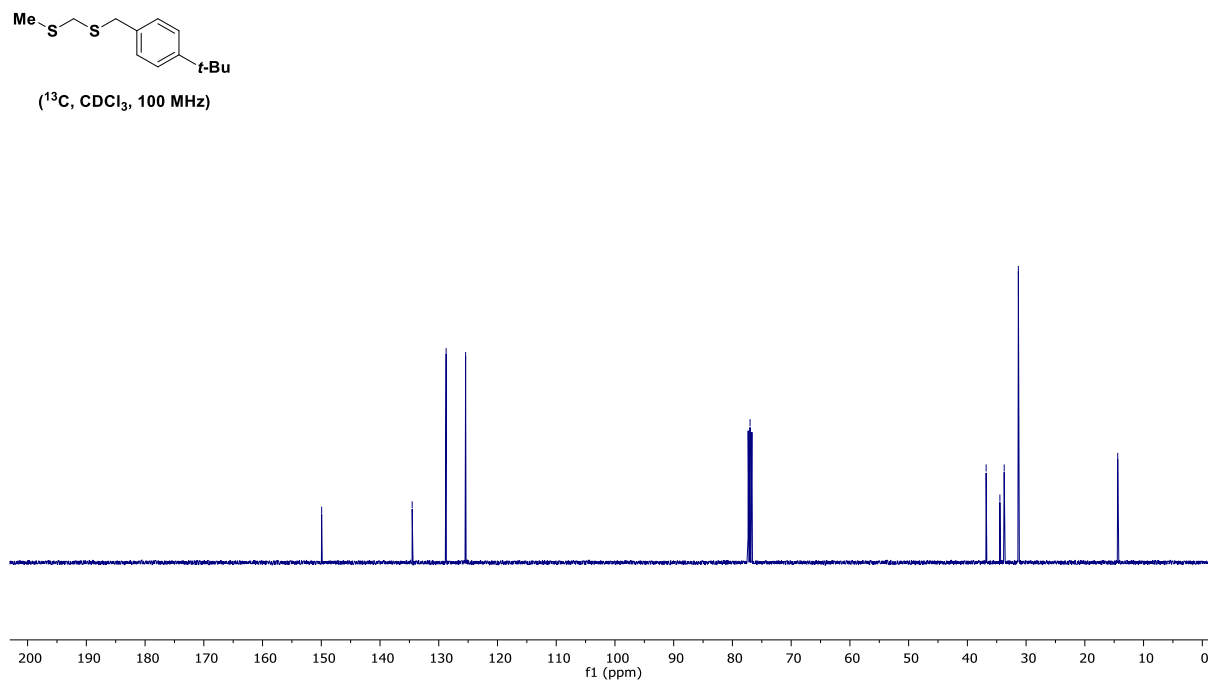

# 1-Chloro-4-(((methylsulfanyl)methyl)sulfanyl)methyl)benzene (25)

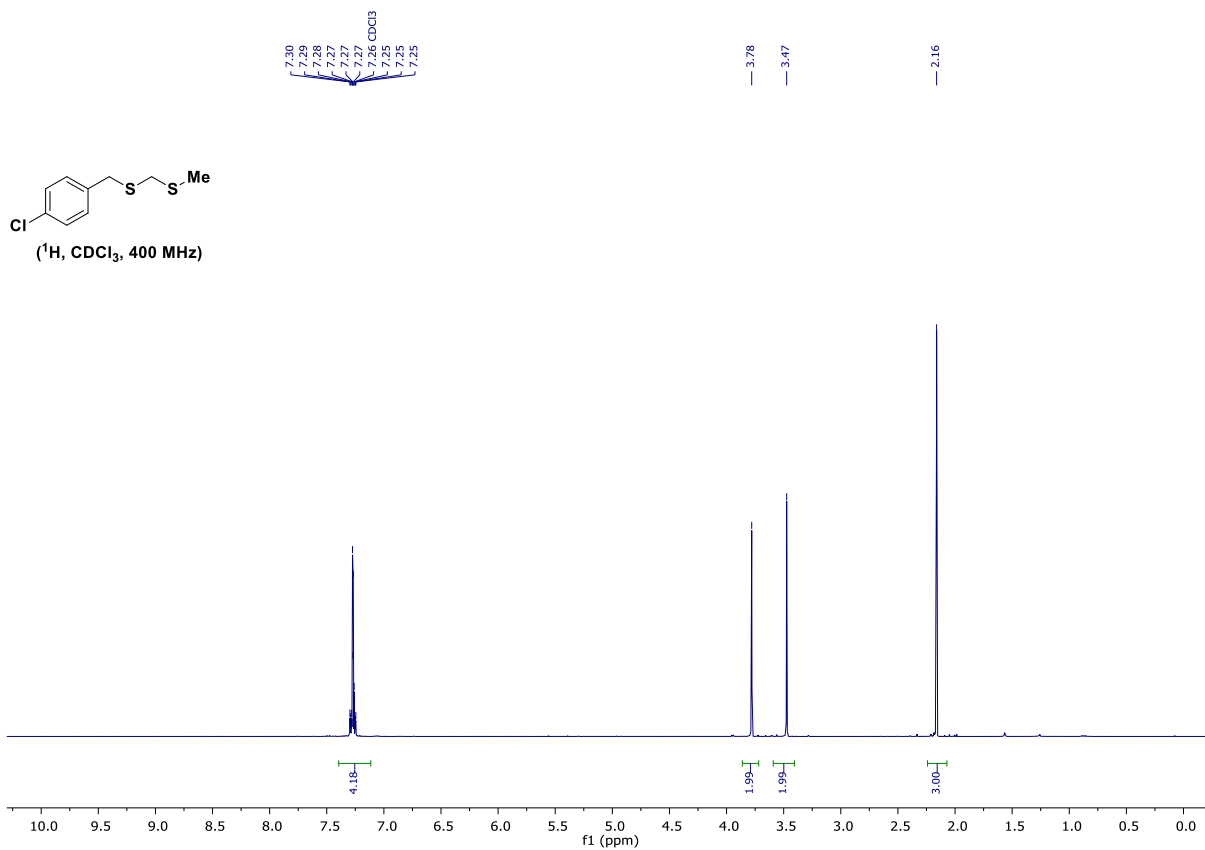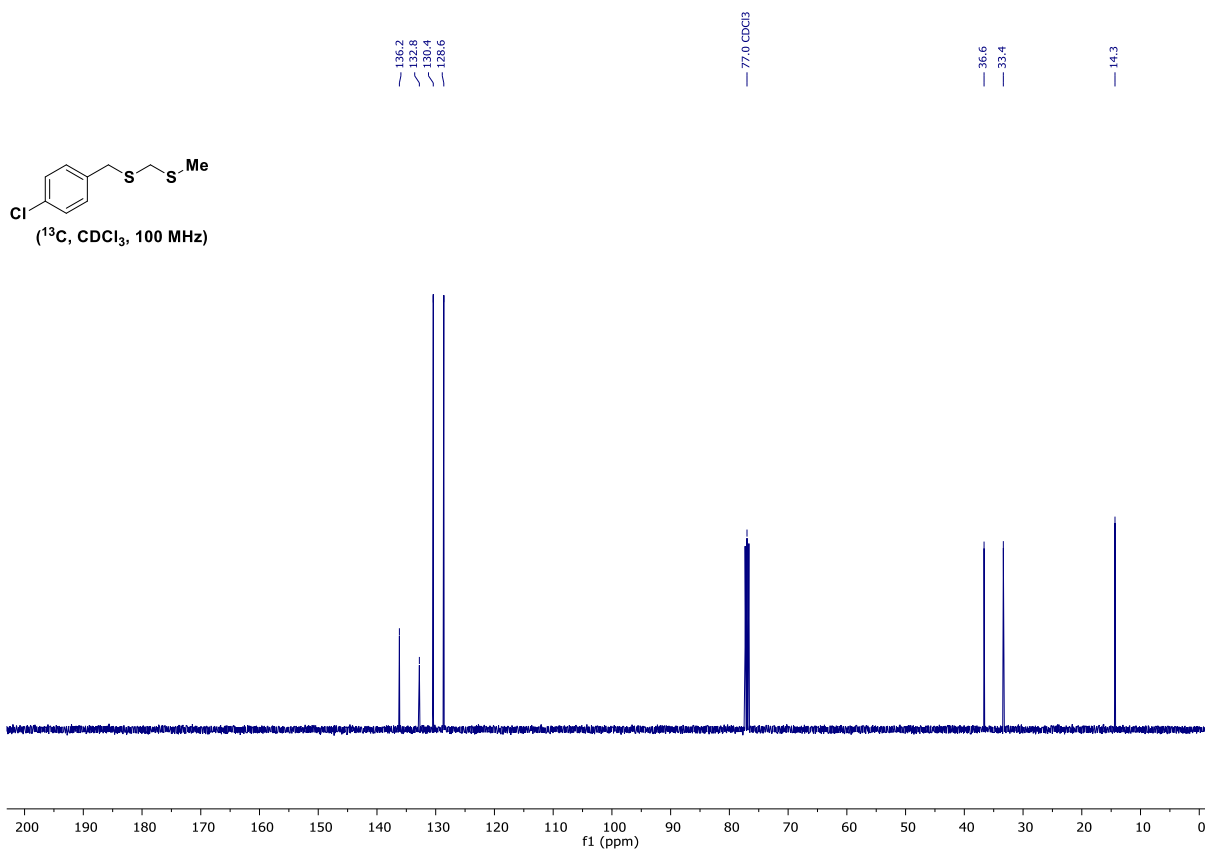

# {[(Methylsulfanyl)methyl]sulfanyl}cyclopentane (26)

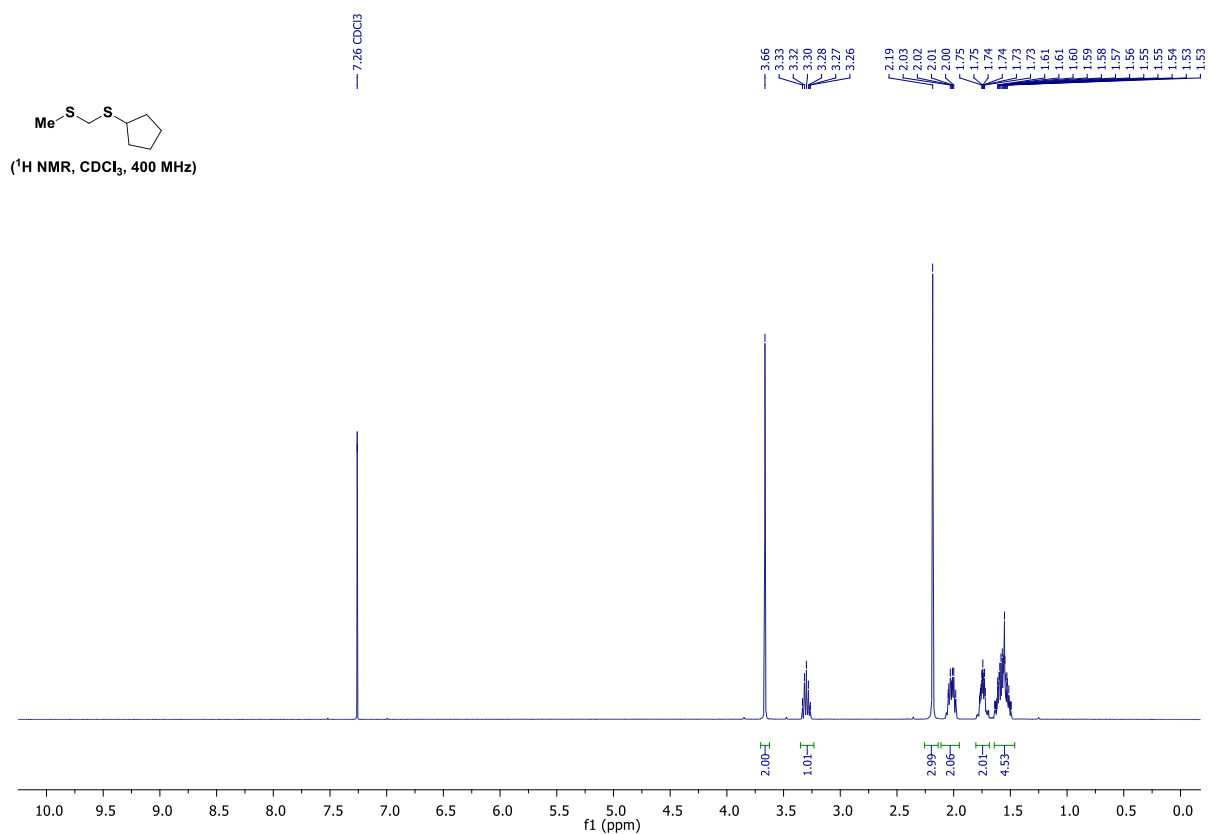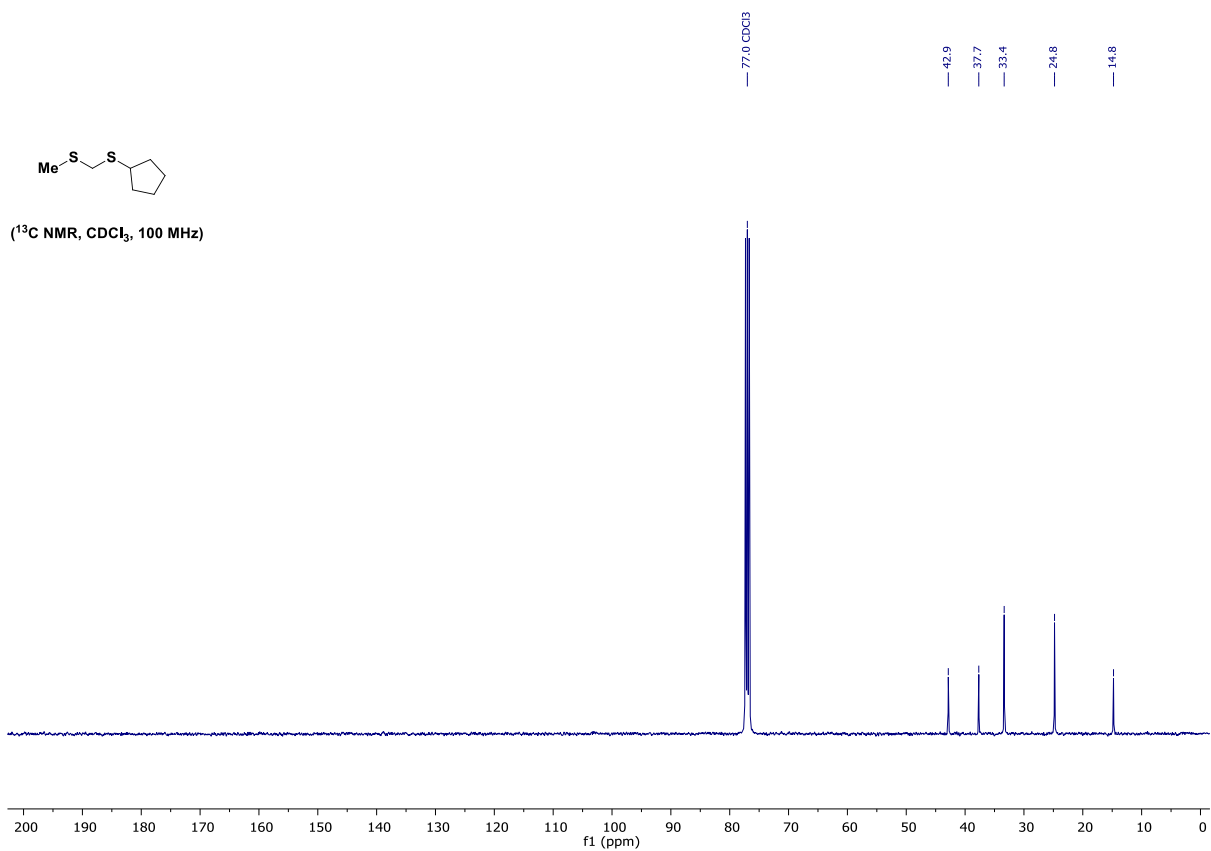

# {[(Methylsulfonyl)methyl]sulfonyl}cyclohexane (27)

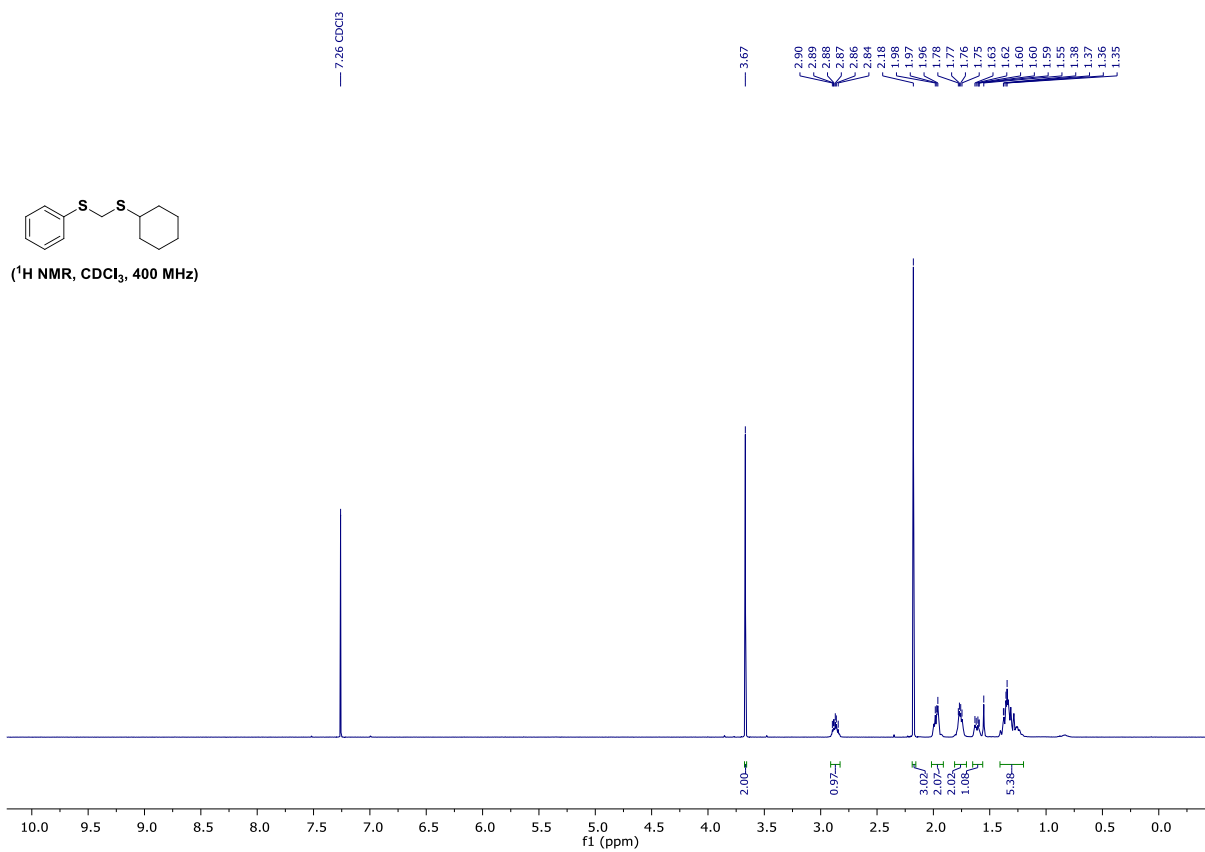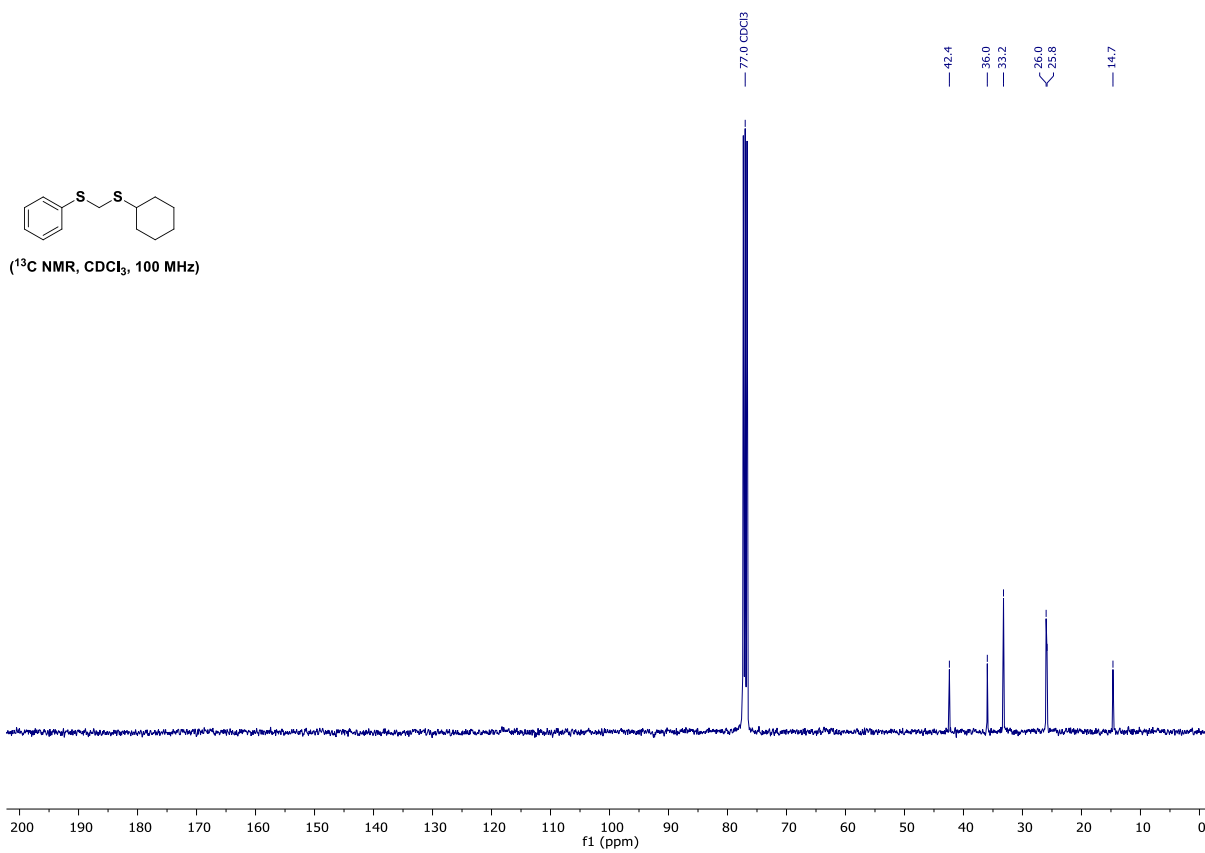

# 1,1',1''-{[(Methylsulfonyl)methyl]sulfonyl}methanetriyl)tribenzene (28)

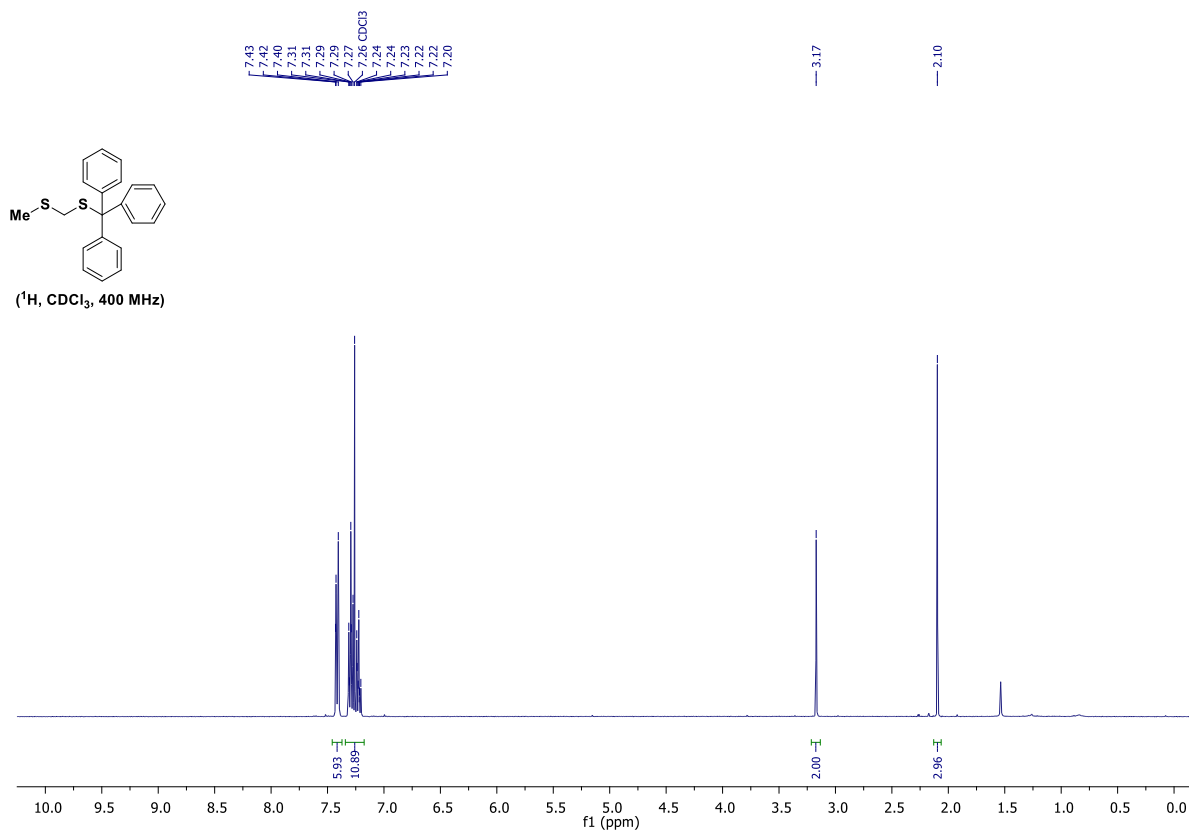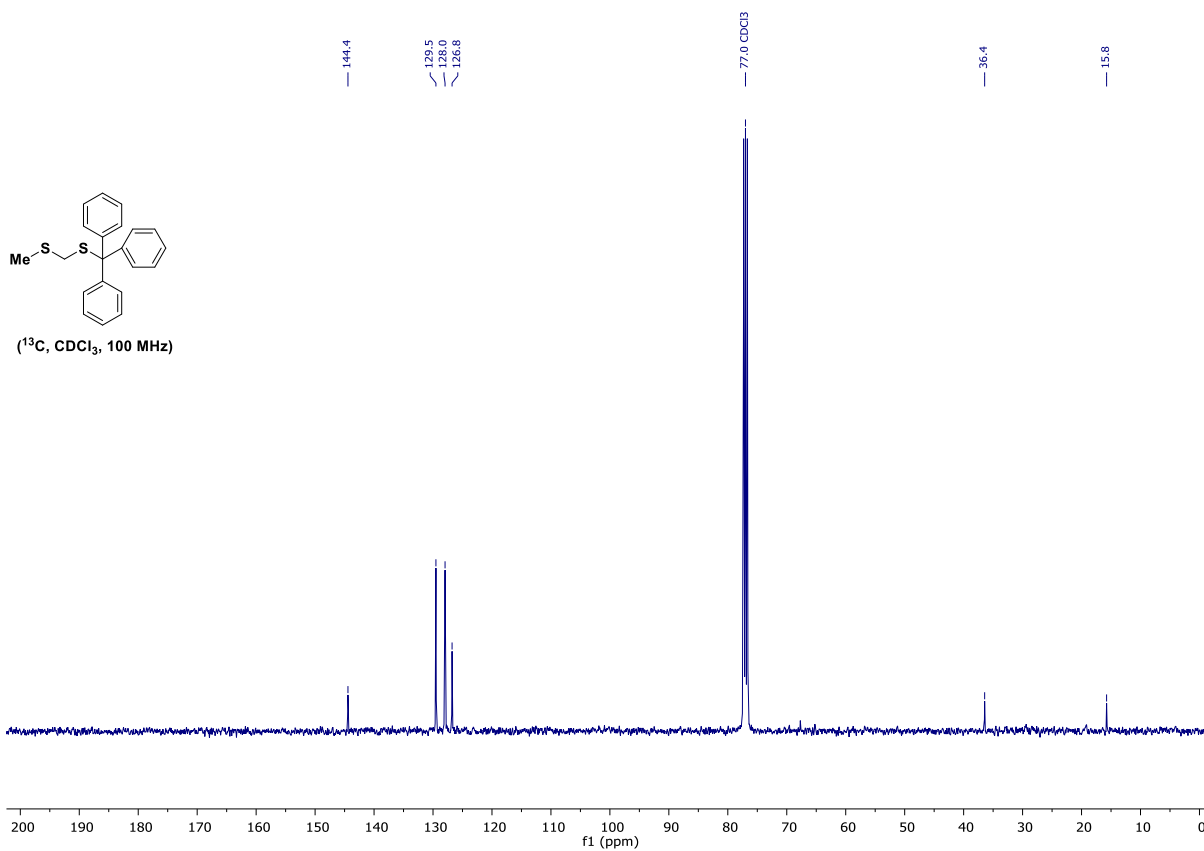

# 1-[[Methylsulfanyl)methyl]sulfanyl]adamantane (29)

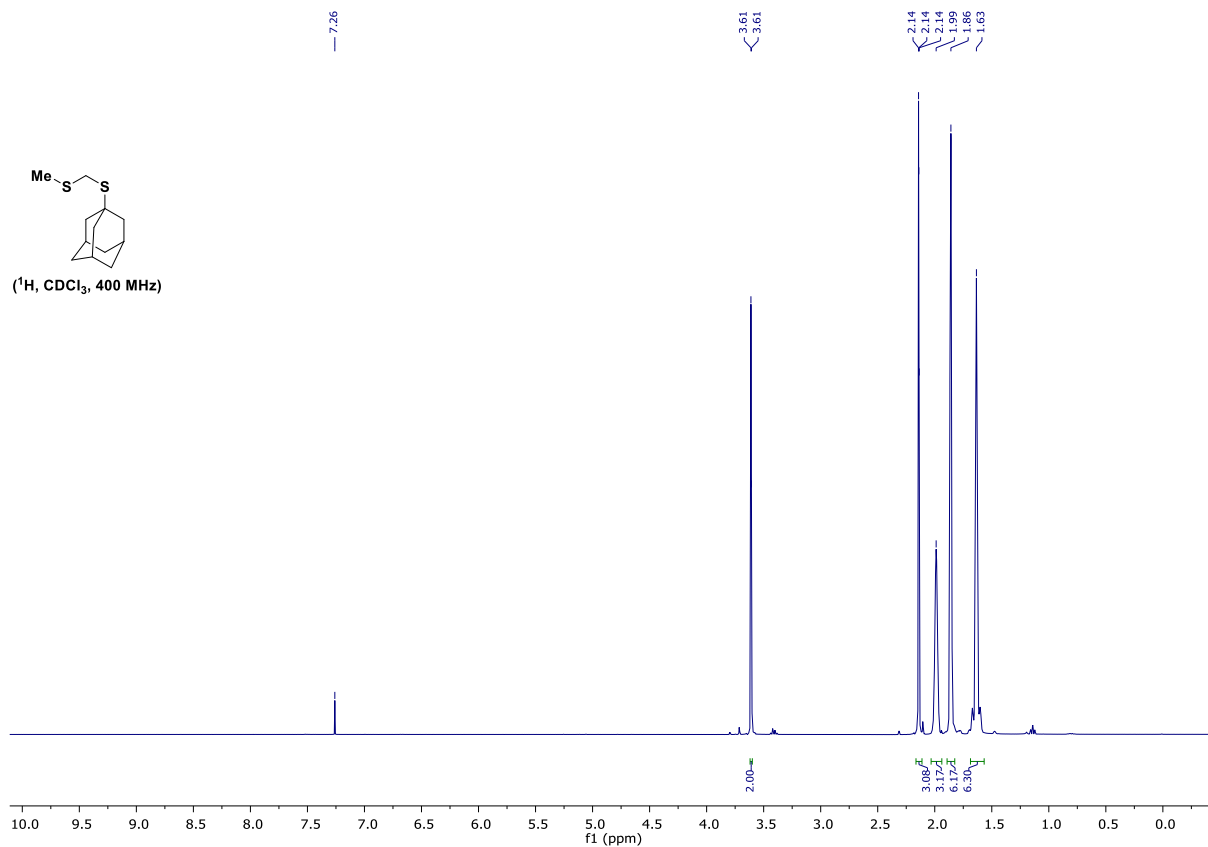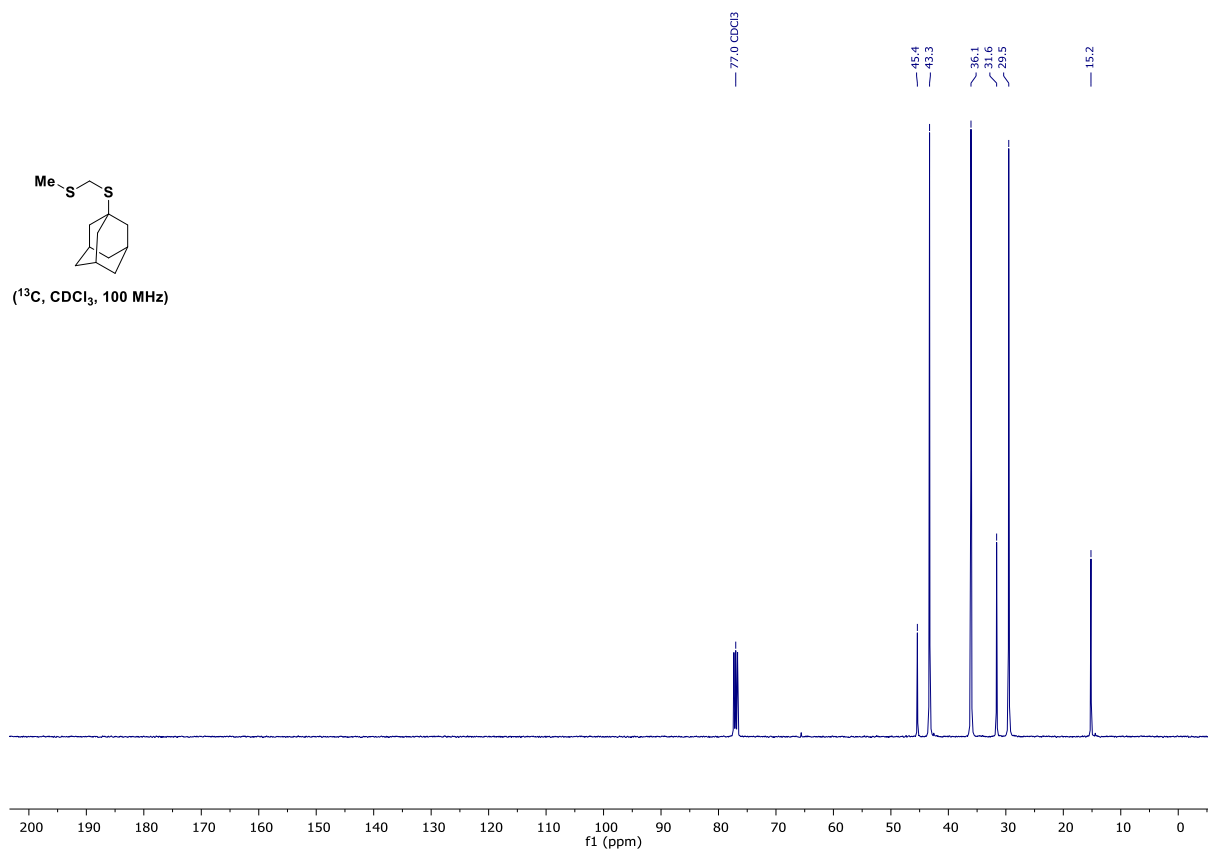



## 2-[[[(Methylsulfanyl)methyl]sulfonyl]-1,3-benzoxazole (30)

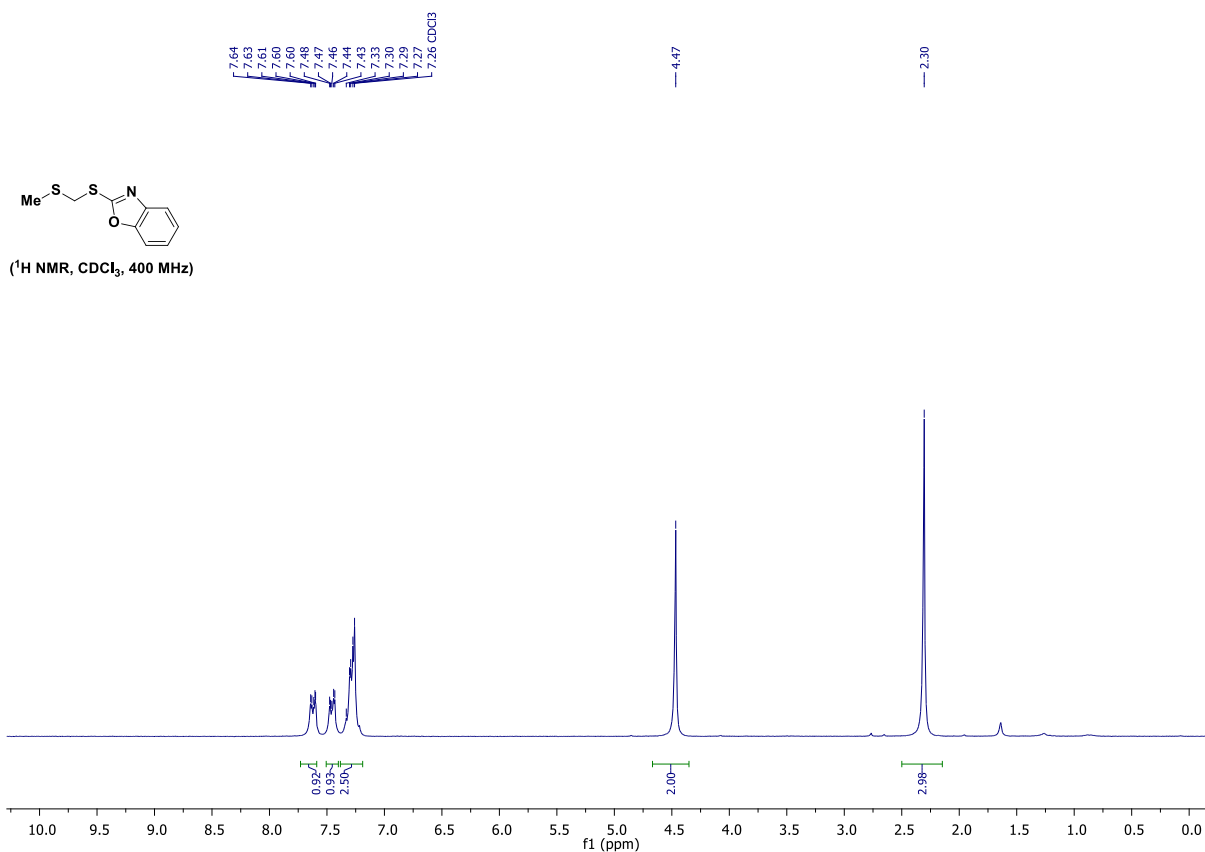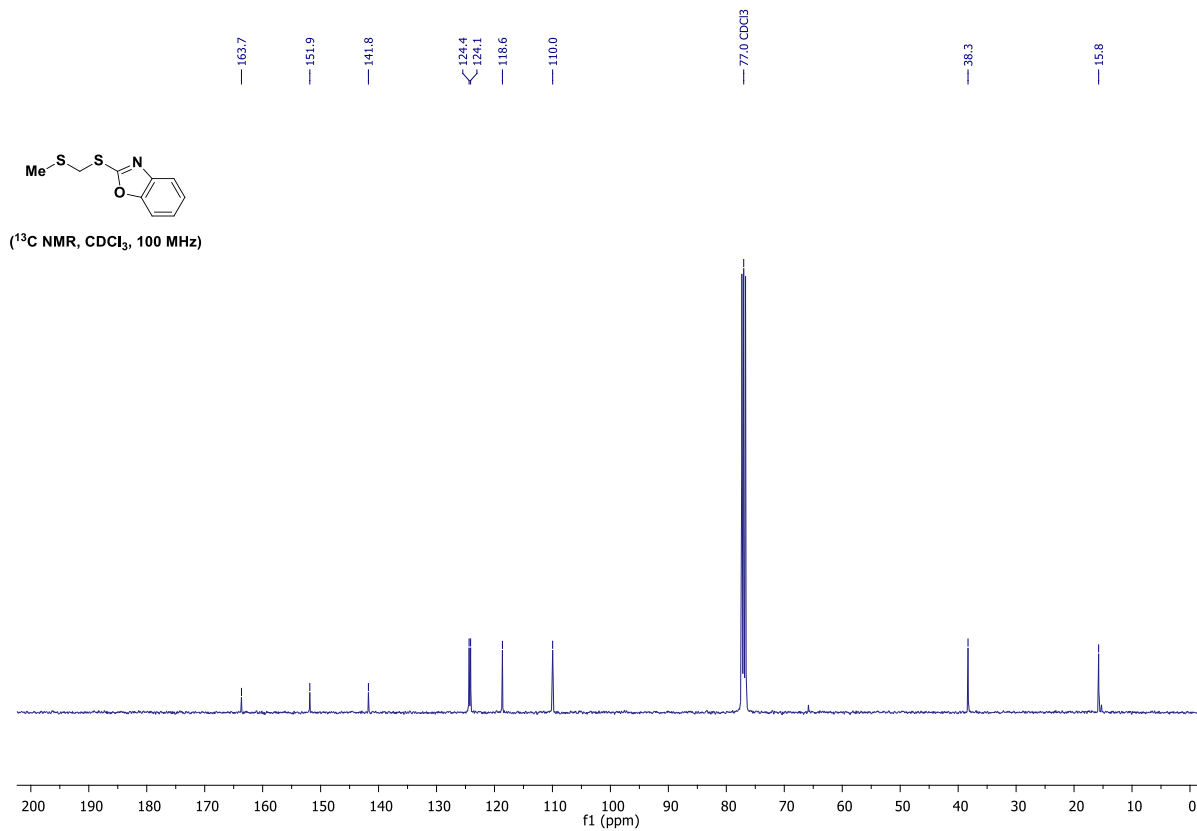

# 4,6-Dimethyl-2-[[[(methylsulfonyl)methyl]sulfonyl]pyrimidine (31)

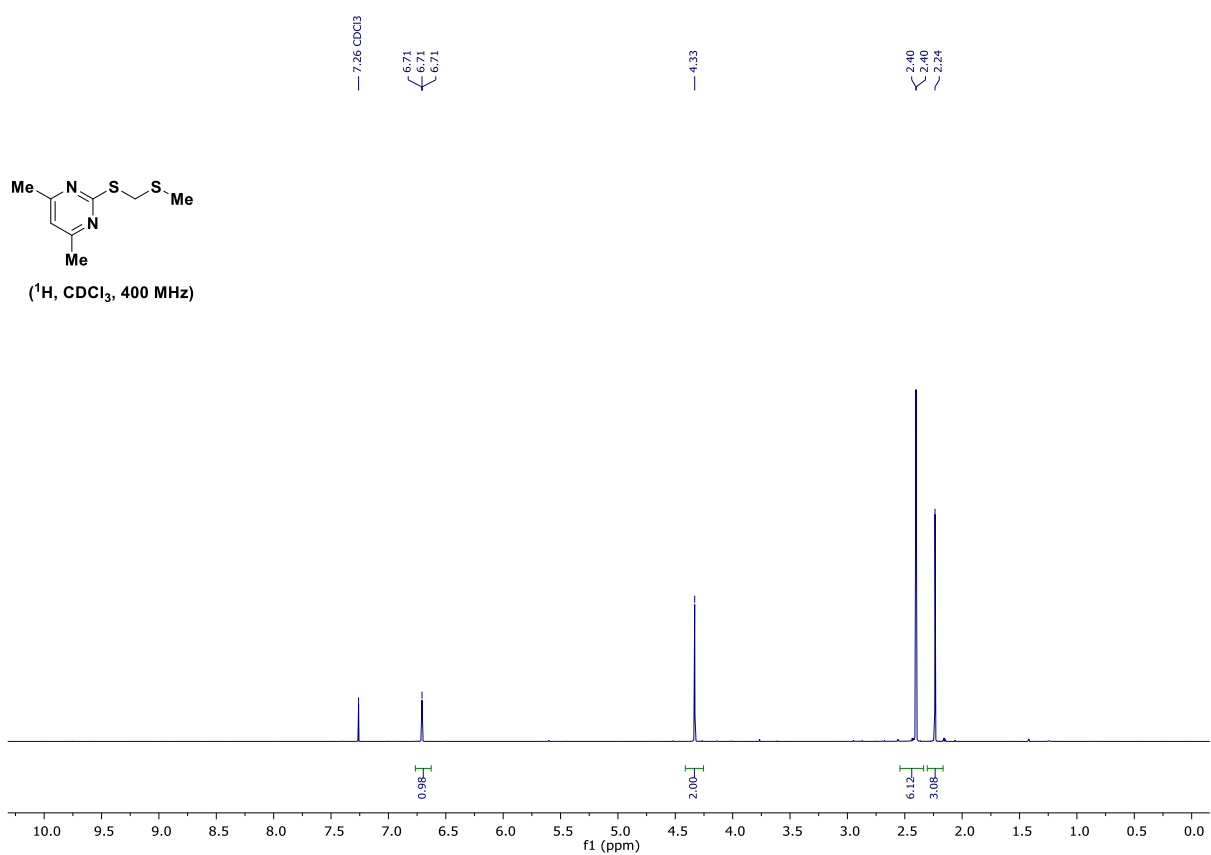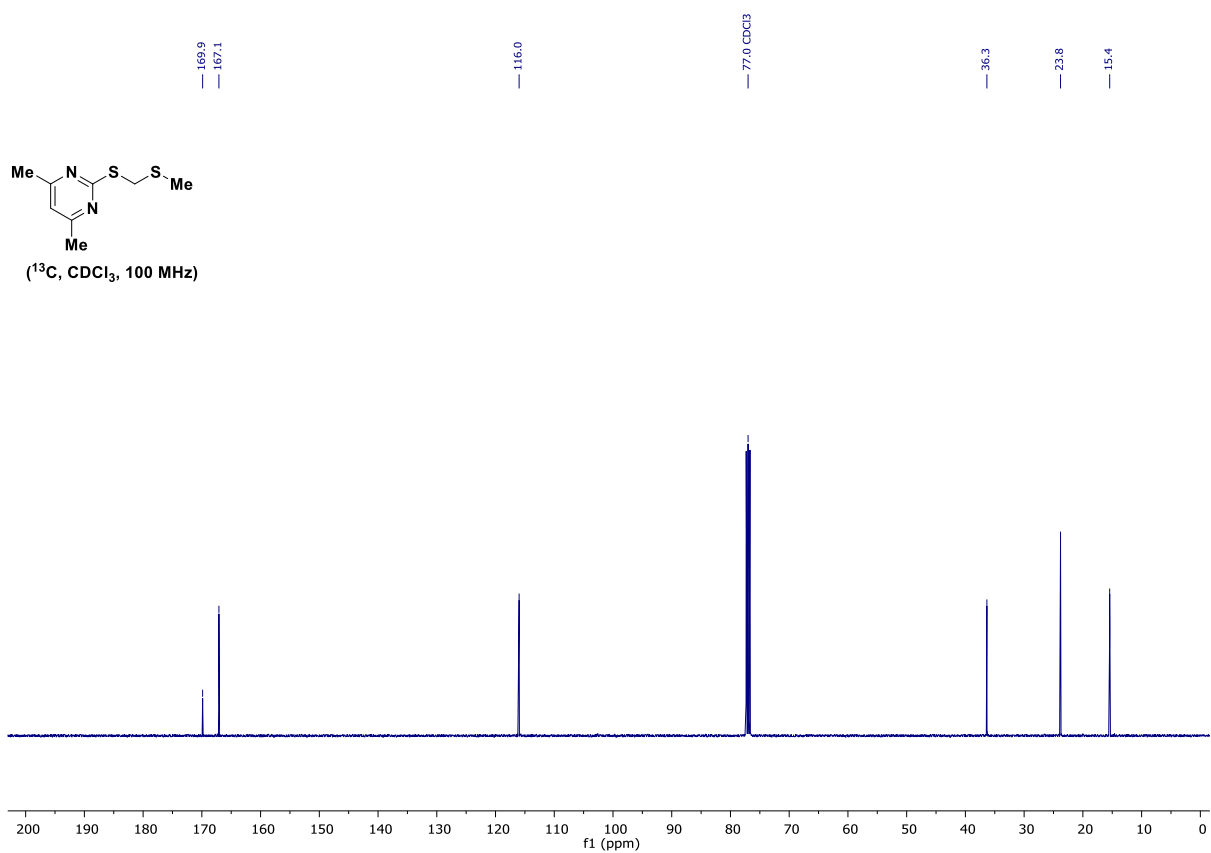

2-[[[(Methylsulfanyl)methyl]sulfanyl]-5-[[3-(trifluoromethyl)benzyl]sulfanyl]-1,3,4-thiadiazole  
(32)

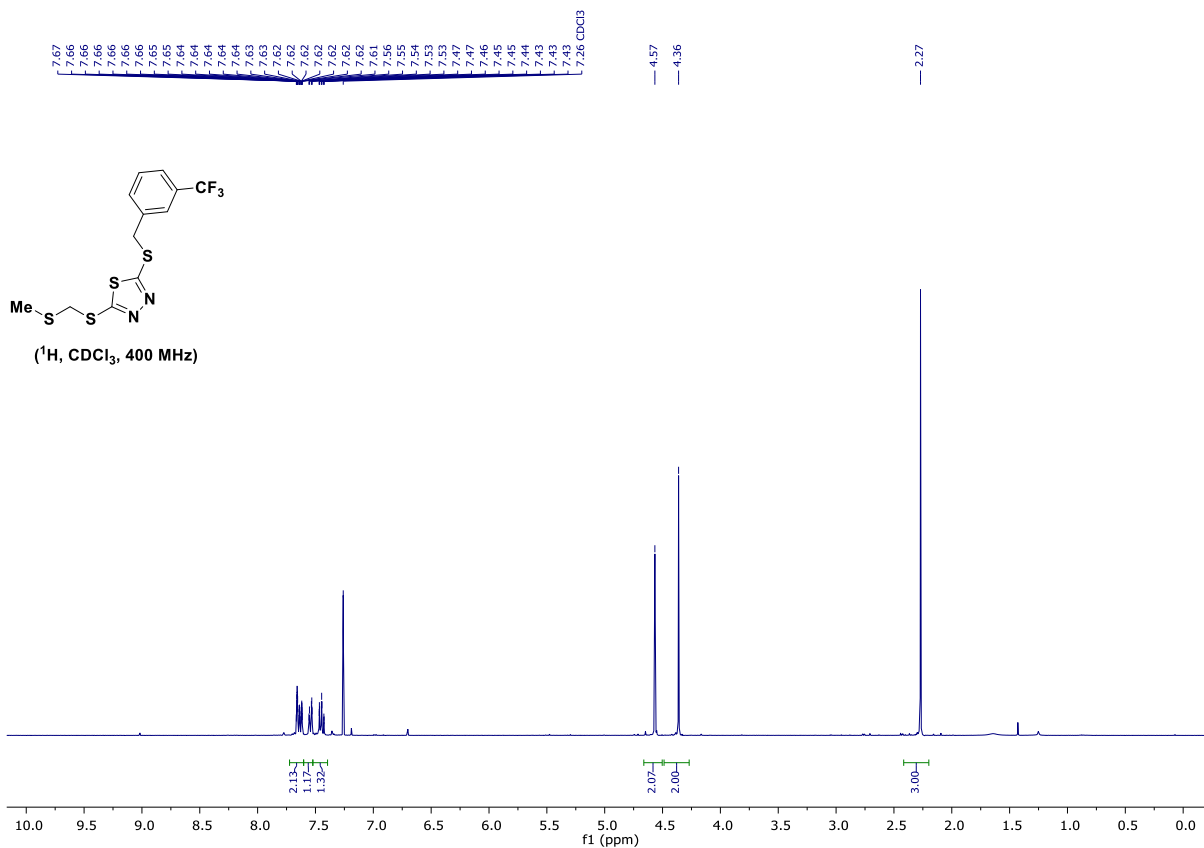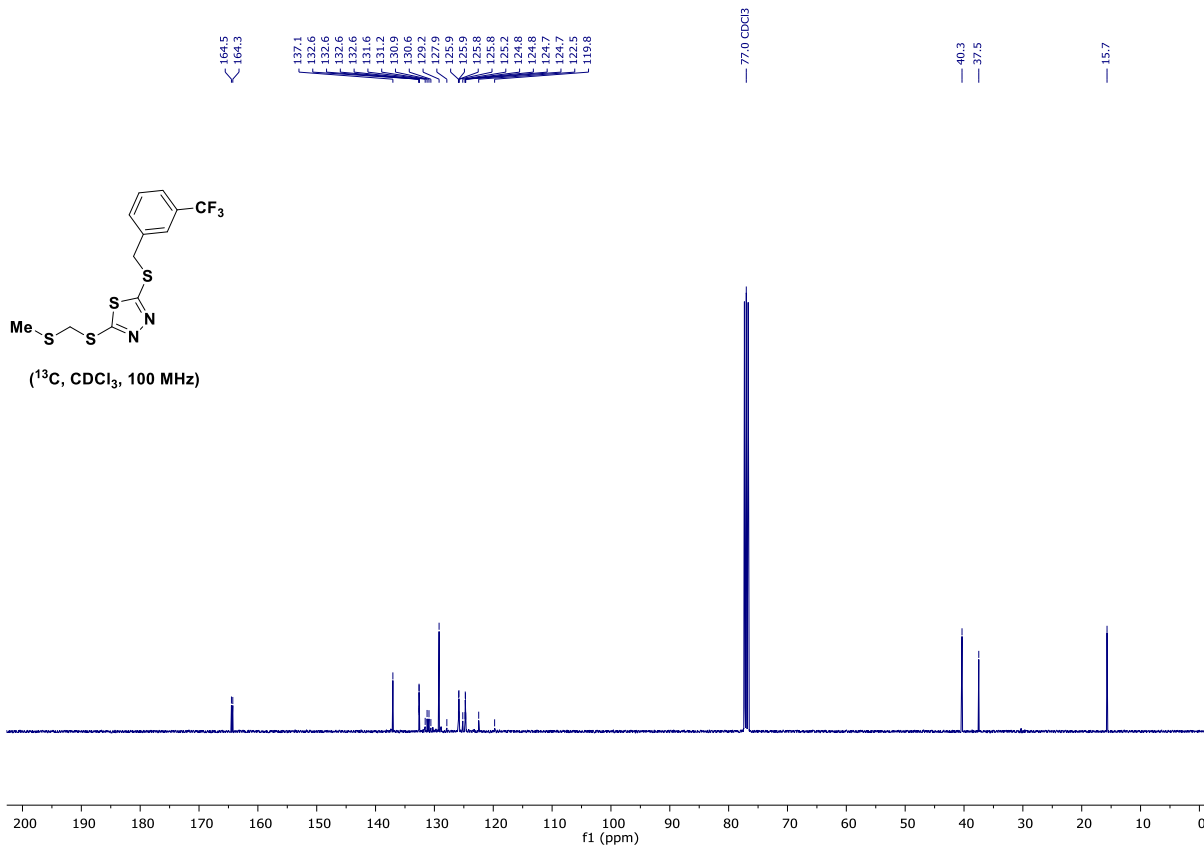

# 1-Methoxy-4-({[(phenylsulfanyl)methyl]sulfanyl)methyl}benzene (33)

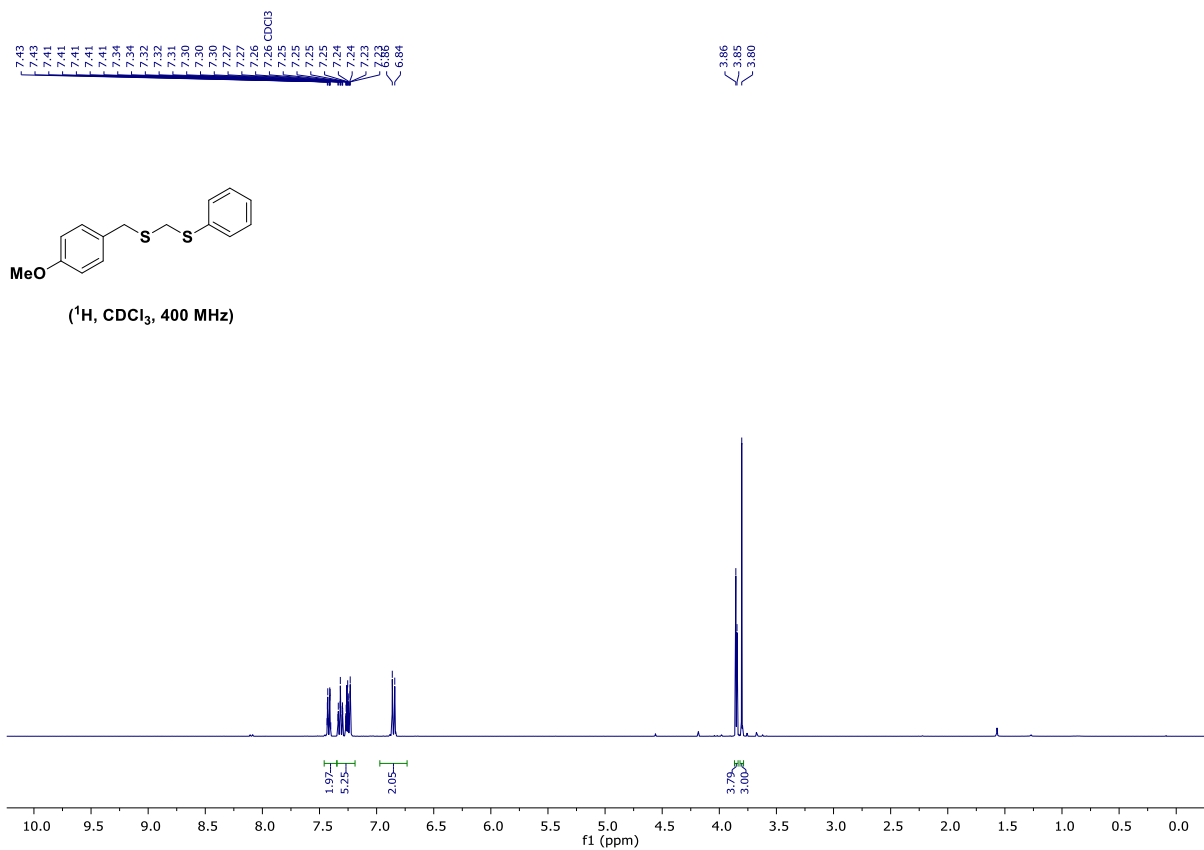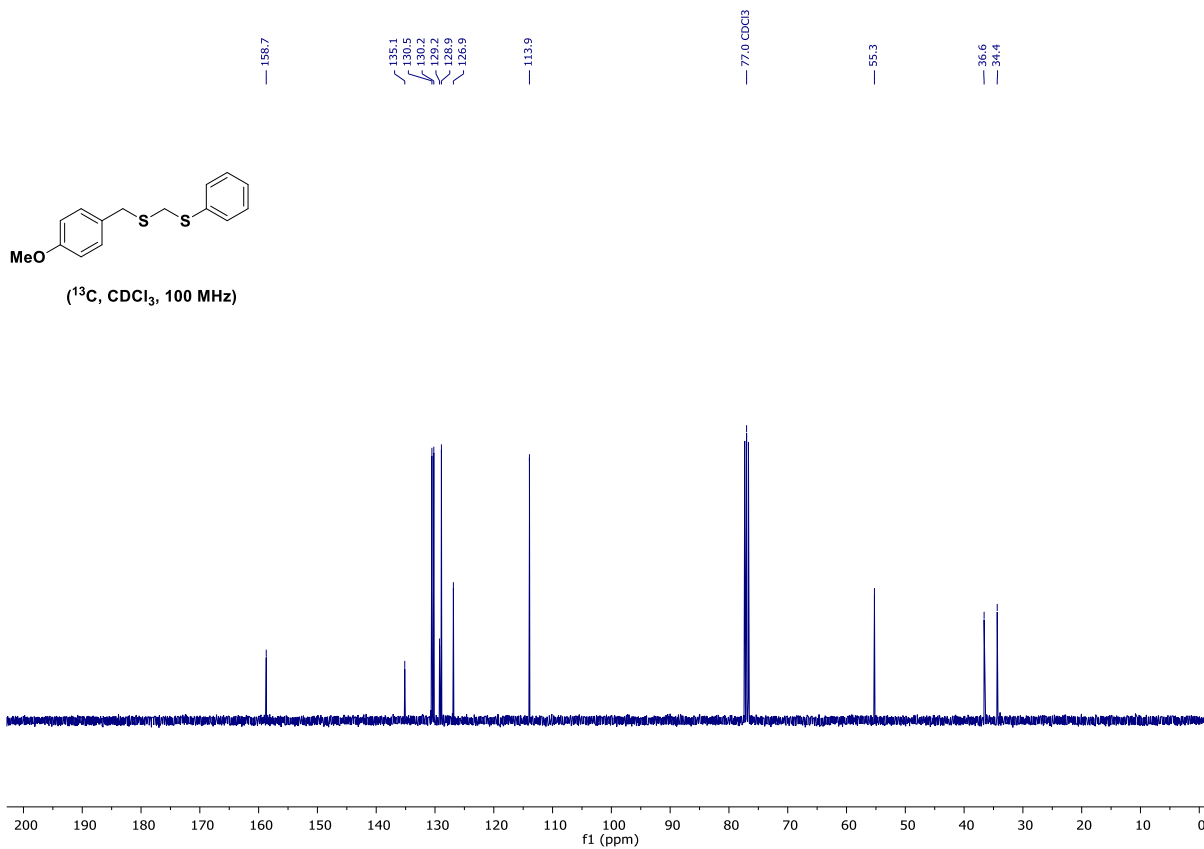

# 1,1'-[Methylenebis(sulfanedimethylene)]dibenzene (34)

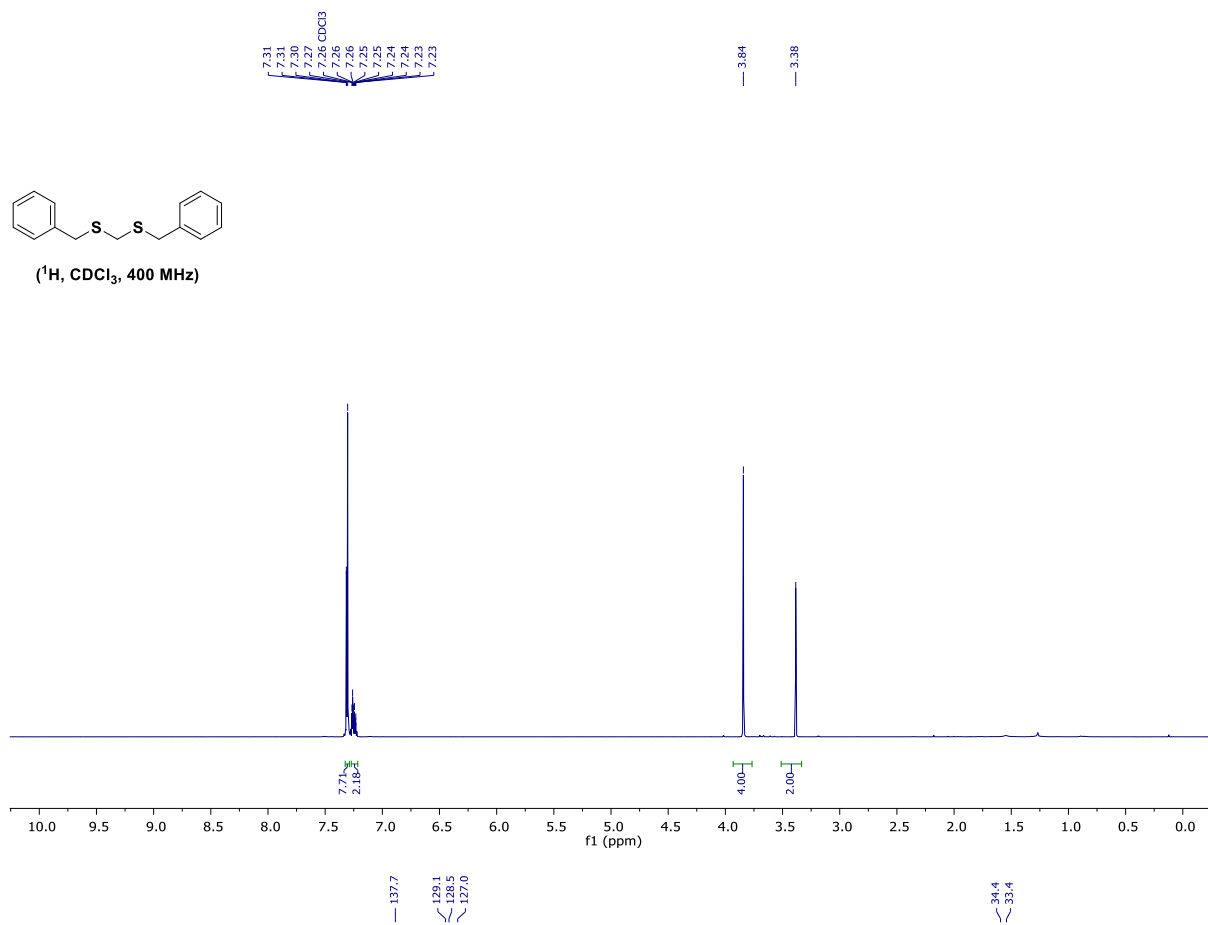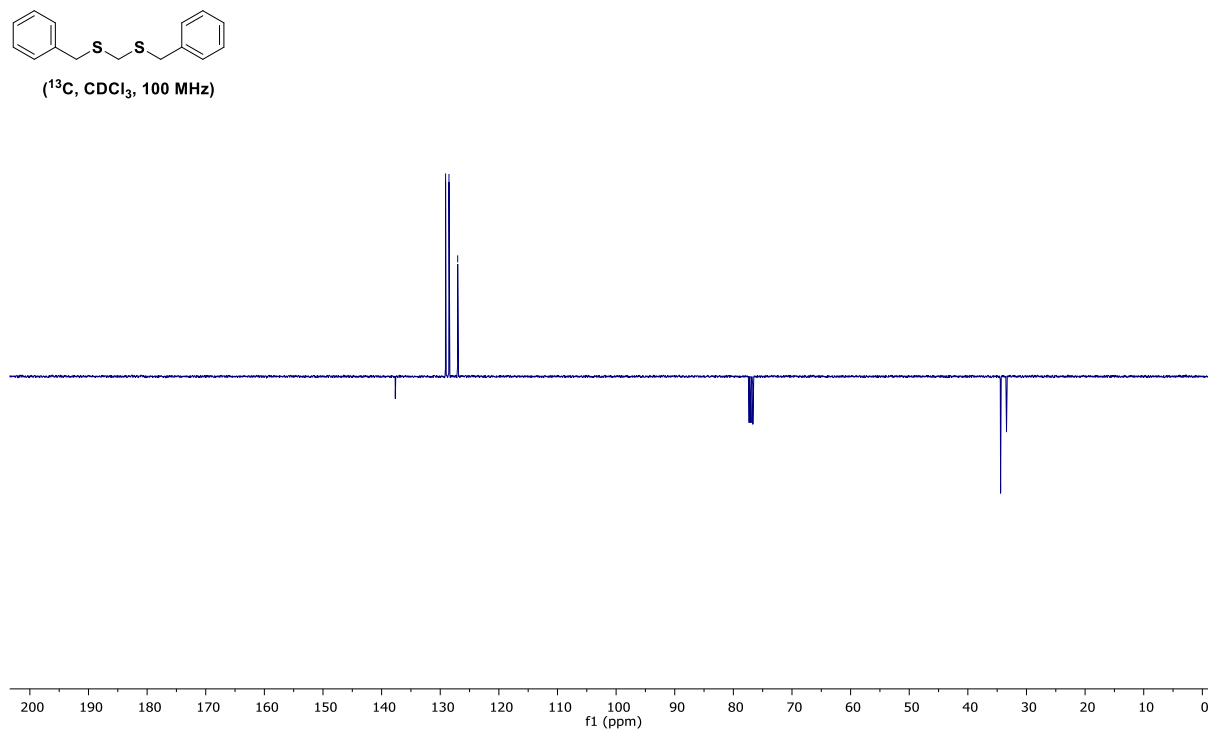

# Methyl 2-[[[(methylsulfanyl)methyl]sulfanyl]benzoate (35)

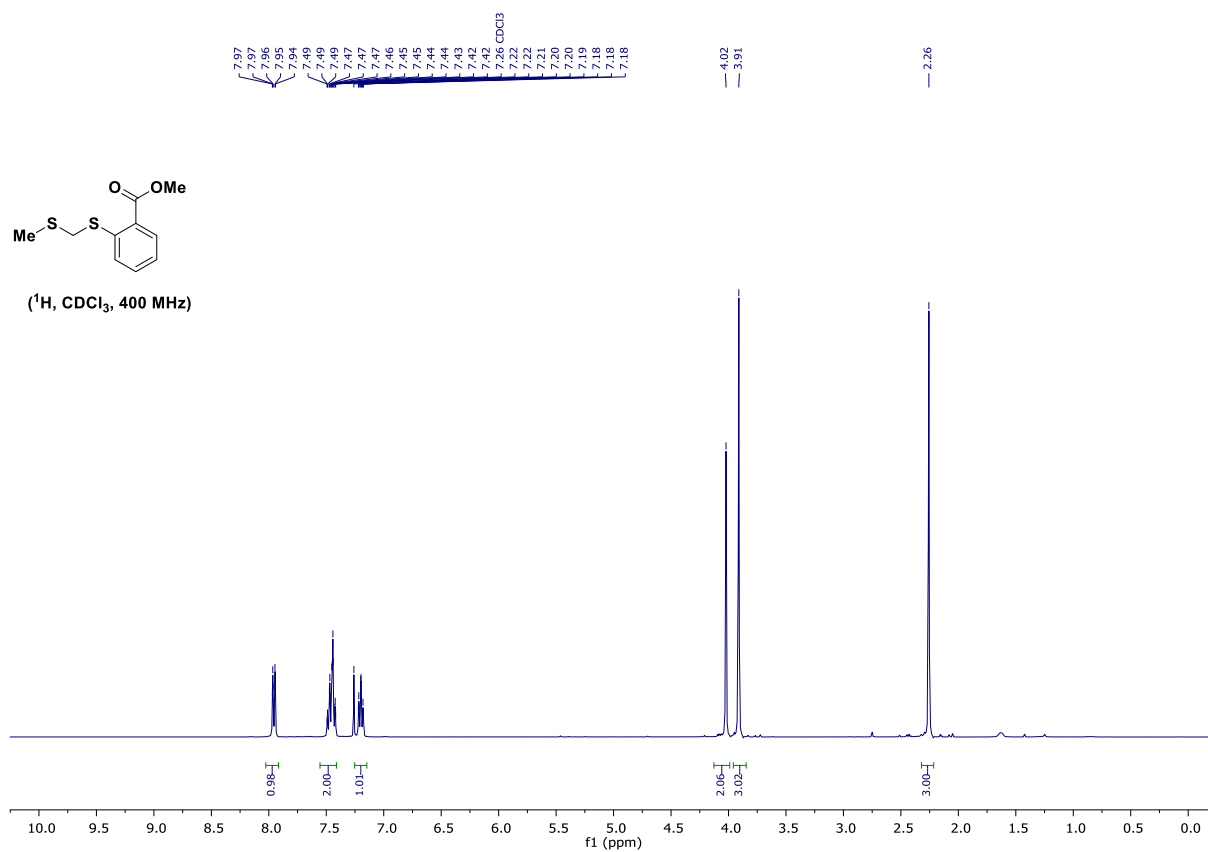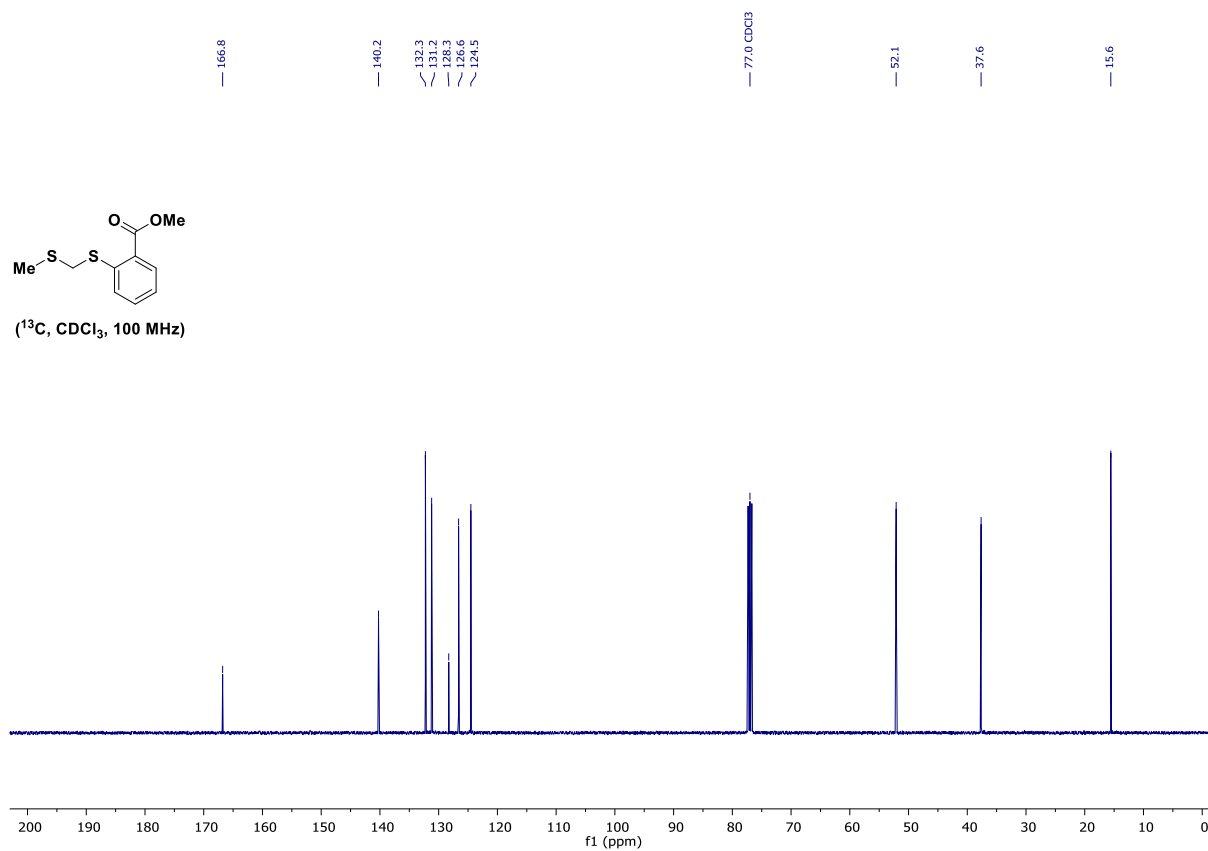

# (((Prop-2-en-1-yl)sulfanyl)methyl)sulfanyl)benzene (36)

7.47  
7.44  
7.43  
7.43  
7.38  
7.37  
7.37  
7.31  
7.30  
7.29  
7.28 CDCl<sub>3</sub>  
5.86  
5.84  
5.82  
5.81  
5.80  
5.78  
5.77  
5.76  
5.74  
5.72  
5.69  
5.19  
5.14  
5.12  
5.11  
3.99  
3.34  
3.31

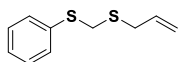

(<sup>1</sup>H, CDCl<sub>3</sub>, 200 MHz)

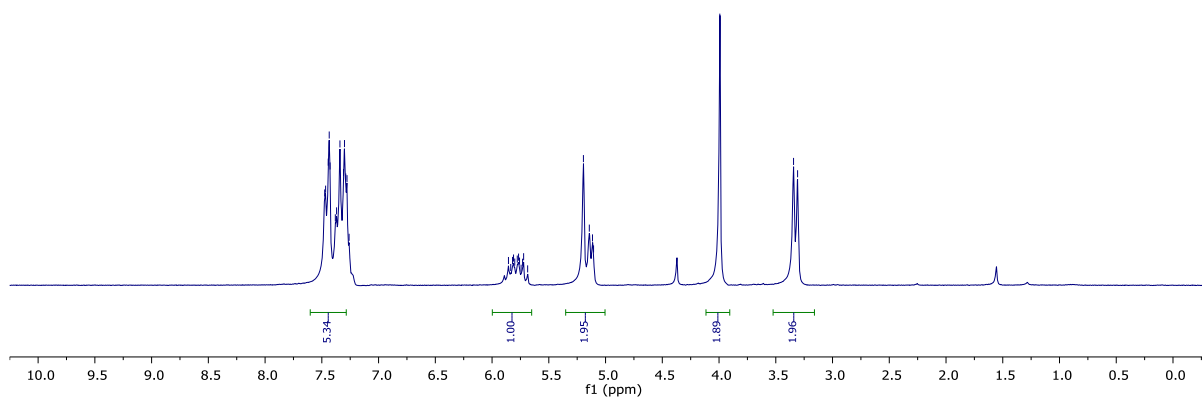

135.07  
133.12  
130.61  
128.90  
126.91  
118.08  
77.00 CDCl<sub>3</sub>  
36.26  
33.61

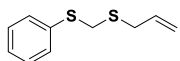

(<sup>13</sup>C, CDCl<sub>3</sub>, 50 MHz)

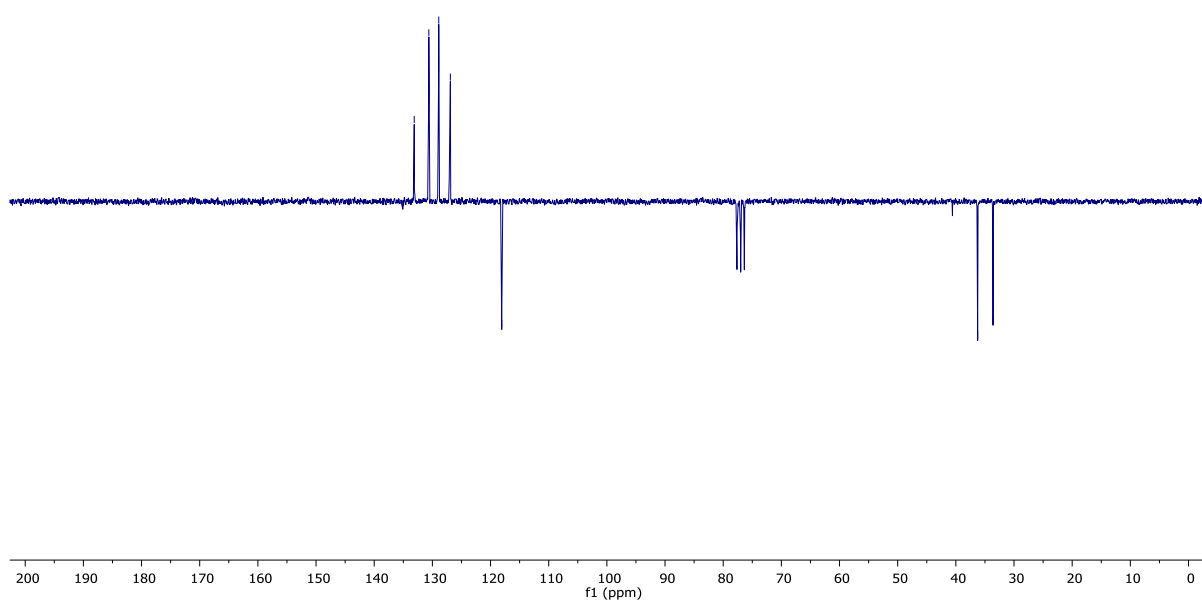

## 2,4-Dimethyl-3-(2-[[[(methylsulfanyl)methyl]sulfanyl]phenyl]-3-pentanol (37)

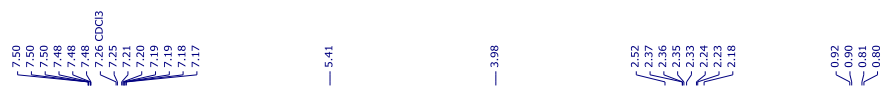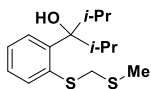

( $^1\text{H}$ , CDCl<sub>3</sub>, 400 MHz)

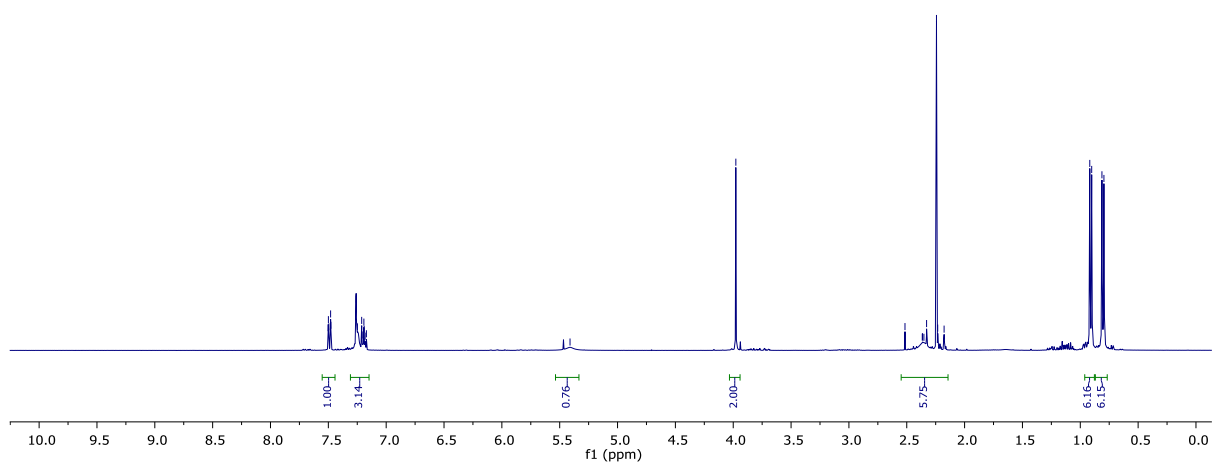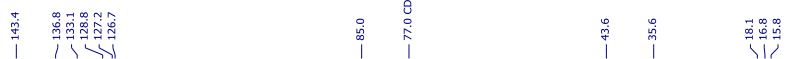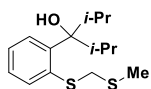

( $^{13}\text{C}$ , CDCl<sub>3</sub>, 100 MHz)

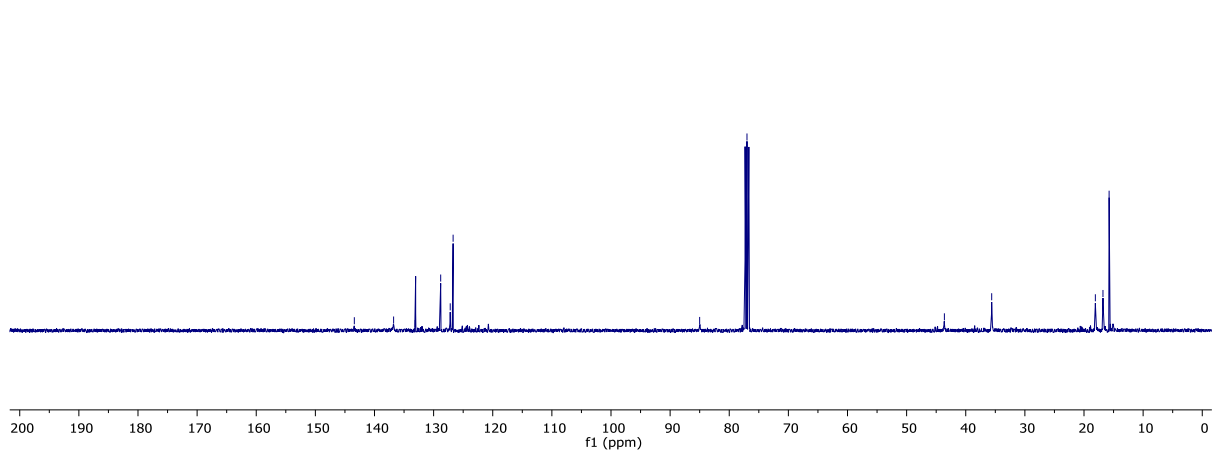



**2-Methyl-1-(2-[[[(methylsulfanyl)methyl]sulfanyl]phenyl]-1-propanone (38)**

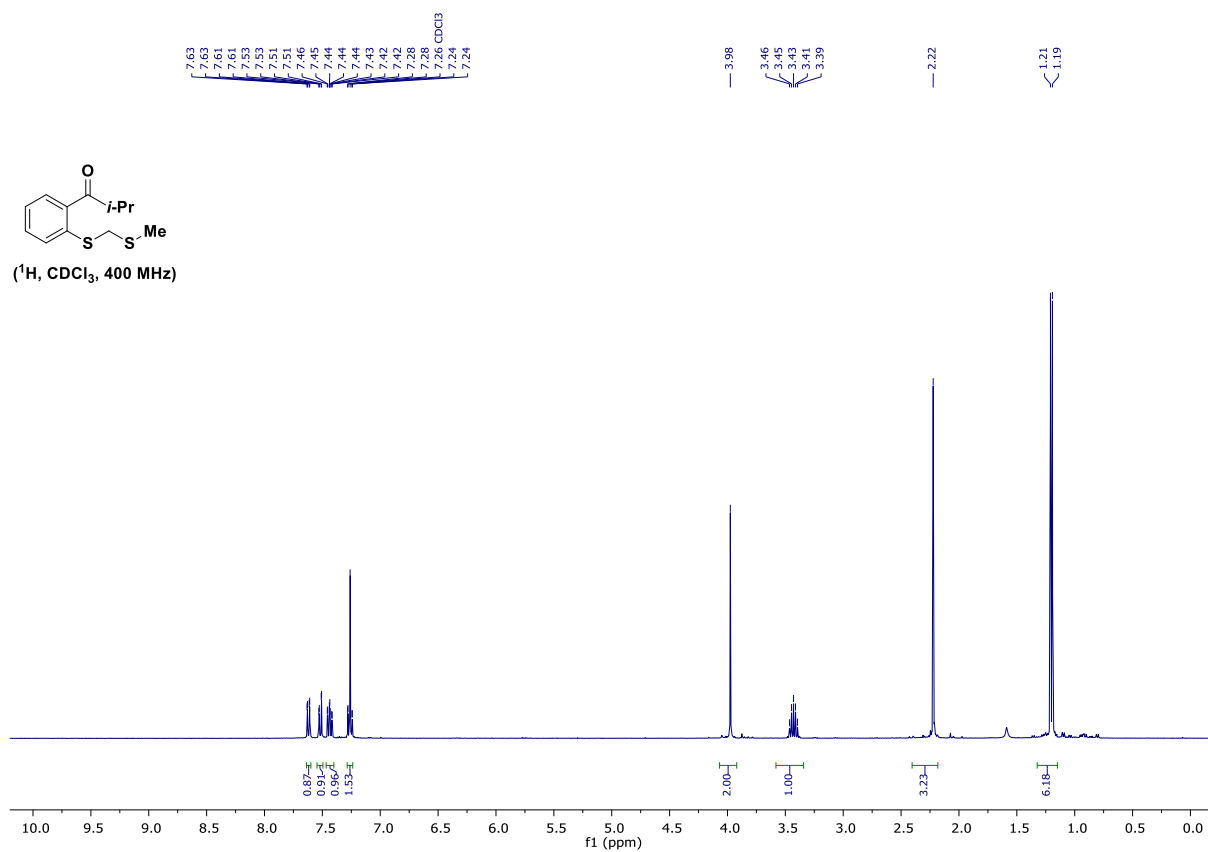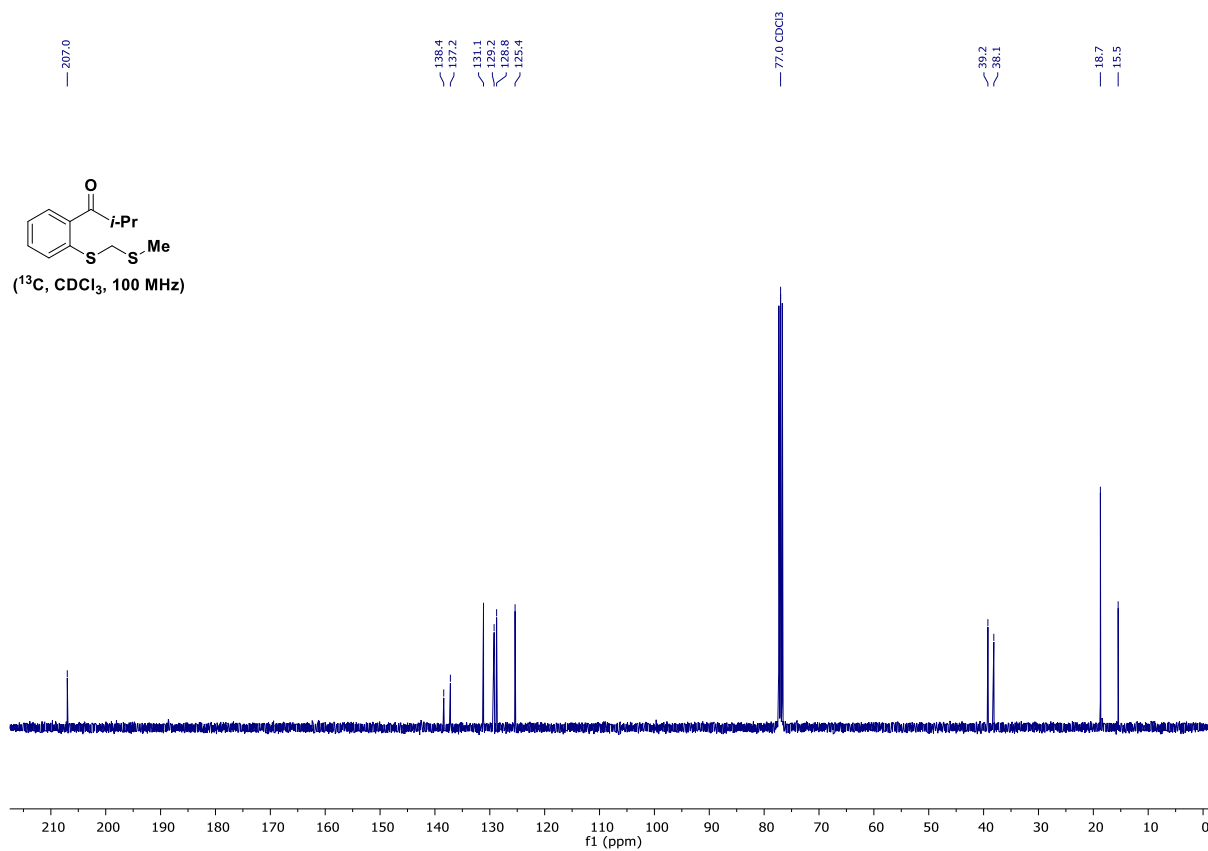

## 2-Methyl-1-(2-[[[(methylsulfonyl)methyl]sulfonyl]phenyl]-1-propanol (39)

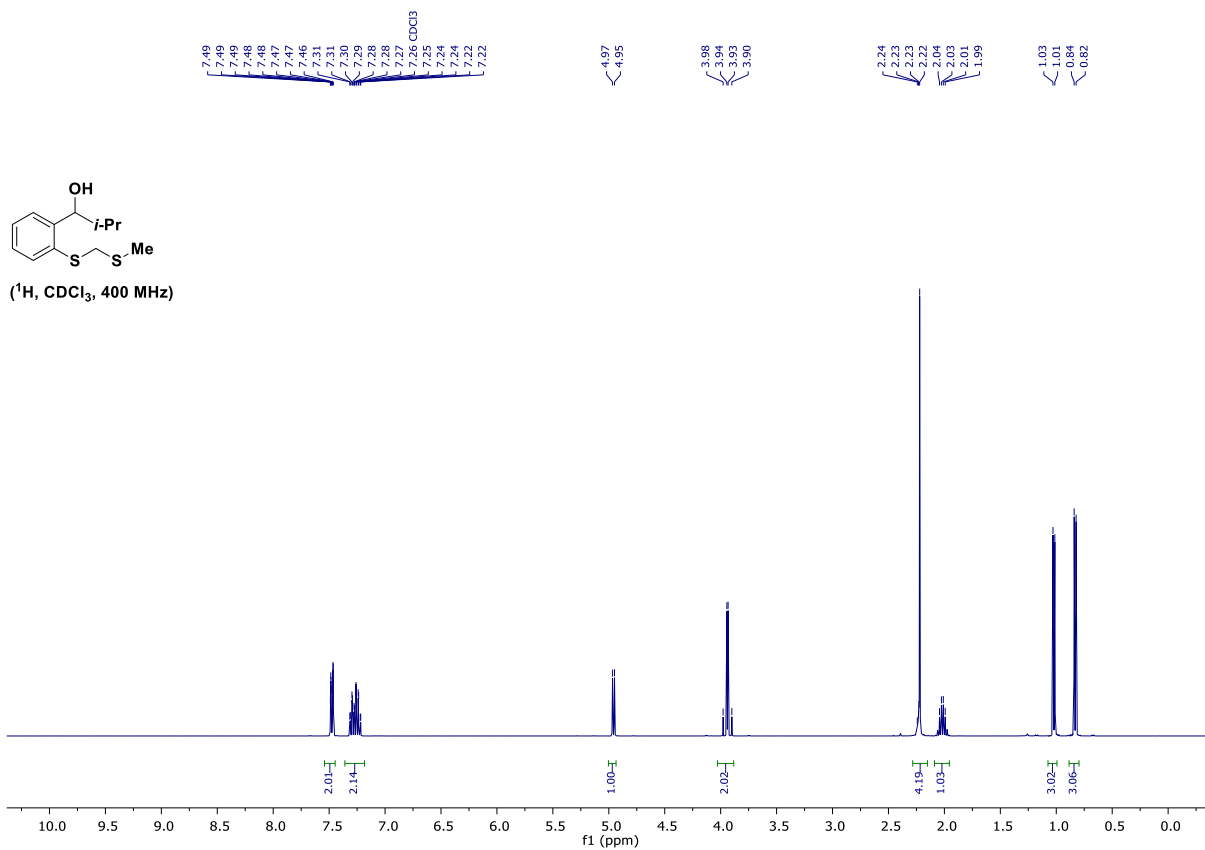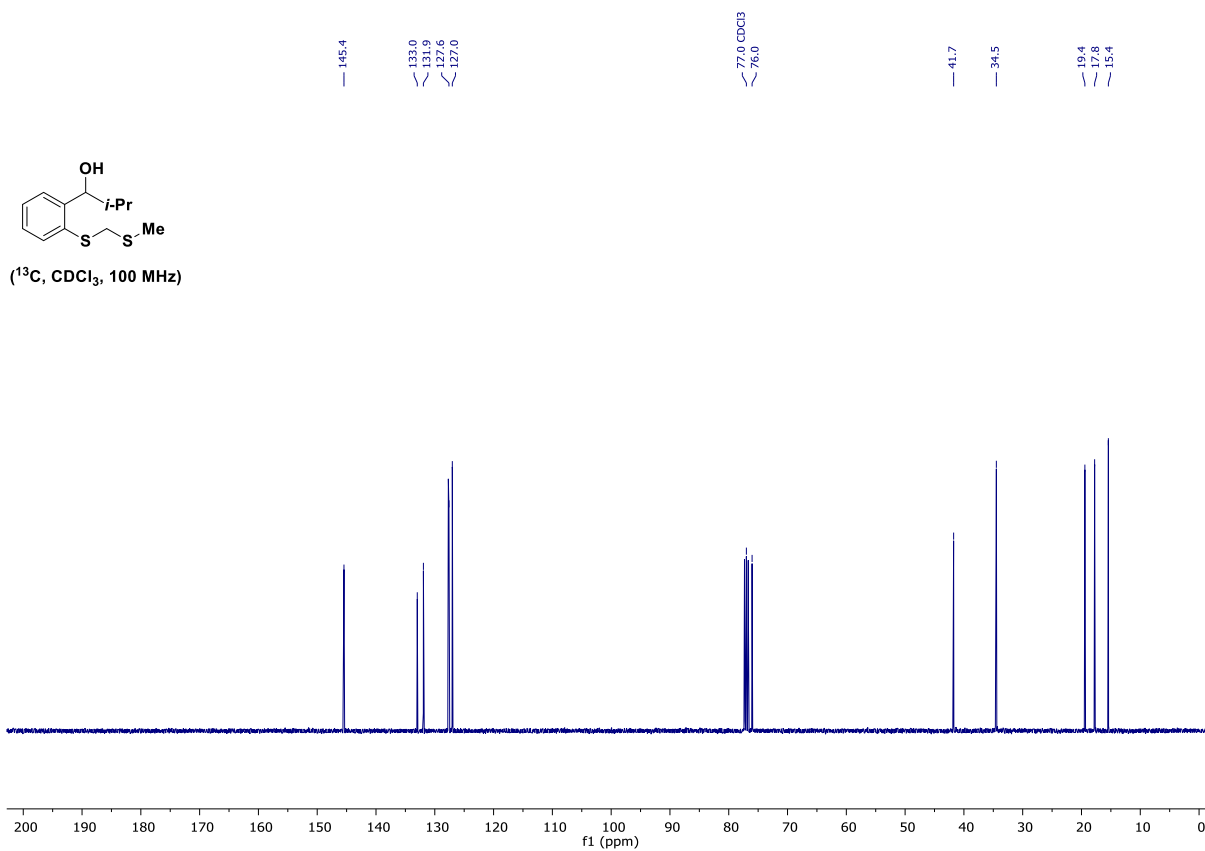

Supplement: d0cc04896h1.pdf [file d0cc04896h1.pdf]
